# Supplementary material for: The Impact of Genetic Polymorphisms in Glutamate-Cysteine Ligase, a Key Enzyme of Glutathione Biosynthesis, on Ischemic Stroke Risk and Brain Infarct Size
Source: MDPI journal article supplement (doi:10.3390/life12040602), 2022-04-18
Supplement: s1 [file s1]

**Statistics for all *mbmdr*-models of G×G and G×E interactions associated with  
brain infarct size\***

| Risk factors/SNPs     | Number of <i>n</i> -order models, n (%) |      |          |      |          |      |           |      |
|-----------------------|-----------------------------------------|------|----------|------|----------|------|-----------|------|
|                       | 2n (25)                                 | %    | 3n (109) | %    | 4n (524) | %    | 5n (2143) | %    |
| Smoking               | 4                                       | 8,0  | 34       | 10,4 | 128      | 6,1  | 565       | 5,3  |
| Alcohol               | 1                                       | 2,0  | 13       | 4,0  | 66       | 3,1  | 380       | 3,5  |
| Fruit/Vegetable       | 0                                       | 0,0  | 12       | 3,7  | 66       | 3,1  | 369       | 3,4  |
| rs12524494            | 1                                       | 2,0  | 8        | 2,4  | 54       | 2,6  | 315       | 2,9  |
| rs17883901            | 3                                       | 6,0  | 19       | 5,8  | 159      | 7,6  | 828       | 7,7  |
| rs606548              | 2                                       | 4,0  | 16       | 4,9  | 100      | 4,8  | 562       | 5,2  |
| rs636933              | 2                                       | 4,0  | 14       | 4,3  | 123      | 5,9  | 612       | 5,7  |
| rs648595              | 2                                       | 4,0  | 22       | 6,7  | 118      | 5,6  | 565       | 5,3  |
| rs761142              | 3                                       | 6,0  | 8        | 2,4  | 80       | 3,8  | 433       | 4,0  |
| rs2301022             | 3                                       | 6,0  | 19       | 5,8  | 144      | 6,9  | 727       | 6,8  |
| rs3827715             | 2                                       | 4,0  | 17       | 5,2  | 103      | 4,9  | 581       | 5,4  |
| rs7517826             | 0                                       | 0,0  | 7        | 2,1  | 72       | 3,4  | 444       | 4,1  |
| rs11556924            | 4                                       | 8,0  | 22       | 6,7  | 178      | 8,5  | 898       | 8,4  |
| rs12449964            | 1                                       | 2,0  | 10       | 3,1  | 105      | 5,0  | 536       | 5,0  |
| rs12646447            | 5                                       | 10,0 | 37       | 11,3 | 207      | 9,9  | 815       | 7,6  |
| rs2417957             | 6                                       | 12,0 | 33       | 10,1 | 182      | 8,7  | 830       | 7,7  |
| rs4322086             | 9                                       | 18,0 | 17       | 5,2  | 59       | 2,8  | 265       | 2,5  |
| rs6511720             | 0                                       | 0,0  | 2        | 0,6  | 42       | 2,0  | 306       | 2,9  |
| rs783396              | 1                                       | 2,0  | 8        | 2,4  | 44       | 2,1  | 353       | 3,3  |
| rs899997              | 1                                       | 2,0  | 9        | 2,8  | 66       | 3,1  | 331       | 3,1  |
| Summary statistics:   |                                         |      |          |      |          |      |           |      |
| Risk factors          | 5                                       | 10,0 | 59       | 18,0 | 260      | 12,4 | 1314      | 12,3 |
| <i>GCLM/GCLC</i> SNPs | 18                                      | 36,0 | 130      | 39,8 | 953      | 45,5 | 5067      | 47,3 |
| GWAS SNPs             | 27                                      | 54,0 | 138      | 42,2 | 883      | 42,1 | 4334      | 40,4 |

\*G×G (SNP×SNP) and G×E (SNP×risk factor) interactions were analyzed by the model-based multifactor dimensionality reduction (*mbmdr*) method (Calle et al, 2010).
