# Supplementary material for: The Impact of Genetic Polymorphisms in Glutamate-Cysteine Ligase, a Key Enzyme of Glutathione Biosynthesis, on Ischemic Stroke Risk and Brain Infarct Size
Source: MDPI journal article supplement (doi:10.3390/life12040602), 2022-04-18
Supplement: s1 [file s1]

Data on epigenetic regulatory potential of *GCLM* and *GCLC* gene polymorphisms

## rs12524494

| ENCODE              |            |              |            |         |            |                           |           |
|---------------------|------------|--------------|------------|---------|------------|---------------------------|-----------|
| SNP                 | Chromosome | Region Start | Region End | Feature | Type Class | Feature Type              | Epigenome |
| rs12524494          | chr6       | 53495960     | 53507640   | Histone | H3K36me3   | Monocytes-CD14+           |           |
| rs12524494          | chr6       | 53502520     | 53507600   | Histone | H3K36me3   | HMEC                      |           |
| rs12524494          | chr6       | 53502860     | 53507640   | Histone | H3K36me3   | DND-41                    |           |
| rs12524494          | chr6       | 53503800     | 53507640   | Histone | H3K36me3   | NHEK                      |           |
| rs12524494          | chr6       | 53505300     | 53507660   | Histone | H3K36me3   | HepG2                     |           |
| rs12524494          | chr6       | 53505400     | 53507580   | Histone | H3K36me3   | A549                      |           |
| rs12524494          | chr6       | 53506200     | 53507460   | Histone | H3K36me3   | NH-A*                     |           |
| Roadmap Epigenomics |            |              |            |         |            |                           |           |
| SNP                 | Chromosome | Region Start | Region End | Feature | Type Class | Feature Type              | Epigenome |
| rs12524494          | chr6       | 53495880     | 53511800   | Histone | H3K36me3   | Monocytes-CD14+ (PB)      | Roadmap   |
| rs12524494          | chr6       | 53495880     | 53511800   | Histone | H3K36me3   | Monocytes-CD14+ (PB)      | Roadmap   |
| rs12524494          | chr6       | 53496460     | 53507660   | Histone | H3K36me3   | iPS-20b                   |           |
| rs12524494          | chr6       | 53497640     | 53509680   | Histone | H3K36me3   | Natural Killer cells (PB) |           |
| rs12524494          | chr6       | 53497640     | 53509680   | Histone | H3K36me3   | Natural Killer cells (PB) |           |
| rs12524494          | chr6       | 53502080     | 53507460   | Histone | H3K36me3   | B cells (PB) Roadmap      |           |
| rs12524494          | chr6       | 53502080     | 53507460   | Histone | H3K36me3   | B cells (PB) Roadmap      |           |
| rs12524494          | chr6       | 53502860     | 53507700   | Histone | H3K36me3   | T cells (PB) Roadmap      |           |
| rs12524494          | chr6       | 53502860     | 53507700   | Histone | H3K36me3   | T cells (PB) Roadmap      |           |
| rs12524494          | chr6       | 53503720     | 53507640   | Histone | H3K36me3   | Fetal Adrenal Gland       |           |
| rs12524494          | chr6       | 53503720     | 53507640   | Histone | H3K36me3   | Fetal Adrenal Gland       |           |
| rs12524494          | chr6       | 53503760     | 53507660   | Histone | H3K36me3   | Fetal Thymus              |           |
| rs12524494          | chr6       | 53503760     | 53507660   | Histone | H3K36me3   | Fetal Thymus              |           |
| rs12524494          | chr6       | 53503800     | 53507580   | Histone | H3K36me3   | Placenta                  |           |
| rs12524494          | chr6       | 53503800     | 53507580   | Histone | H3K36me3   | Placenta                  |           |
| rs12524494          | chr6       | 53506640     | 53507560   | Histone | H3K36me3   | Fetal Muscle Leg          |           |
| rs12524494          | chr6       | 53506640     | 53507560   | Histone | H3K36me3   | Fetal Muscle Leg          |           |
| rs12524494          | chr6       | 53506660     | 53507640   | Histone | H3K36me3   | Fetal Intestine Large     |           |
| rs12524494          | chr6       | 53506660     | 53507640   | Histone | H3K36me3   | Fetal Intestine Large     |           |

## rs17883901

| ENCODE     |            |              |            |            |            |                 |           |
|------------|------------|--------------|------------|------------|------------|-----------------|-----------|
| SNP        | Chromosome | Region Start | Region End | Feature    | Type Class | Feature Type    | Epigenome |
| rs17883901 | chr6       | 53539900     | 53545880   | Histone    | H3K4me1    | Monocytes-CD14+ |           |
| rs17883901 | chr6       | 53540344     | 53545981   | Histone    | H3K4me3    | A549            |           |
| rs17883901 | chr6       | 53541755     | 53545672   | Histone    | H3K4me3    | HMEC            |           |
| rs17883901 | chr6       | 53542340     | 53546360   | Histone    | H3K4me1    | K562            |           |
| rs17883901 | chr6       | 53542872     | 53545995   | Histone    | H3K4me2    | DND-41          |           |
| rs17883901 | chr6       | 53542881     | 53545907   | Histone    | H3K4me2    | HMEC            |           |
| rs17883901 | chr6       | 53542884     | 53545328   | Polymerase | PolIII     | NHEK            |           |
| rs17883901 | chr6       | 53542887     | 53545770   | Histone    | H3K4me3    | HepG2           |           |
| rs17883901 | chr6       | 53542888     | 53545831   | Histone    | H3K4me2    | HepG2           |           |
| rs17883901 | chr6       | 53542892     | 53545800   | Histone    | H3K4me3    | NHEK            |           |
| rs17883901 | chr6       | 53542893     | 53545947   | Histone    | H3K4me3    | DND-41          |           |
| rs17883901 | chr6       | 53542899     | 53545656   | Histone    | H3K4me3    | GM12878         |           |
| rs17883901 | chr6       | 53542968     | 53545614   | Histone    | H3K9ac     | HepG2           |           |
| rs17883901 | chr6       | 53542990     | 53545505   | Histone    | H3K4me3    | HeLa-S3         |           |
| rs17883901 | chr6       | 53543037     | 53545515   | Histone    | H3K4me3    | NHLF            |           |
| rs17883901 | chr6       | 53543044     | 53545836   | Histone    | H3K27ac    | HepG2           |           |
| rs17883901 | chr6       | 53543044     | 53545524   | Histone    | H3K9ac     | NHEK            |           |
| rs17883901 | chr6       | 53543045     | 53545649   | Histone    | H3K4me2    | Osteobl         |           |
| rs17883901 | chr6       | 53543060     | 53545756   | Histone    | H3K4me2    | NHDF-AD         |           |
| rs17883901 | chr6       | 53543091     | 53545740   | Histone    | H3K4me2    | NH-A            |           |

|            |      |          |          |                       |                 |         |
|------------|------|----------|----------|-----------------------|-----------------|---------|
| rs17883901 | chr6 | 53543188 | 53545637 | Histone H3K27ac       | NHEK            |         |
| rs17883901 | chr6 | 53543259 | 53545690 | Histone H3K4me3       | NHDF-AD         |         |
| rs17883901 | chr6 | 53543313 | 53545858 | Histone H3K4me3       | Monocytes-CD14+ |         |
| rs17883901 | chr6 | 53543362 | 53545813 | Histone H3K9ac        | DND-41          |         |
| rs17883901 | chr6 | 53543364 | 53545567 | Histone H3K4me3       | K562            |         |
| rs17883901 | chr6 | 53543392 | 53545569 | Histone H3K4me3       | H1ESC           |         |
| rs17883901 | chr6 | 53543426 | 53545562 | Histone H2AZ          | GM12878         |         |
| rs17883901 | chr6 | 53543448 | 53545499 | Histone H3K4me3       | HUVEC           |         |
| rs17883901 | chr6 | 53543486 | 53545794 | Histone H3K4me2       | Monocytes-CD14+ |         |
| rs17883901 | chr6 | 53543534 | 53545604 | Histone H3K4me3       | Osteobl         |         |
| rs17883901 | chr6 | 53543535 | 53545806 | Histone H2AZ          | K562            |         |
| rs17883901 | chr6 | 53543537 | 53545638 | Histone H3K9ac        | K562            |         |
| rs17883901 | chr6 | 53543551 | 53545417 | Transcription Factor  | HEY1HepG2       |         |
| rs17883901 | chr6 | 53543643 | 53545434 | Histone H3K4me3       | NH-A            |         |
| rs17883901 | chr6 | 53543710 | 53545583 | Histone H2AZ          | HSMM            |         |
| rs17883901 | chr6 | 53543783 | 53545567 | Histone H3K4me3       | HSMM            |         |
| rs17883901 | chr6 | 53543953 | 53545511 | Transcription Factor  | Sin3Ak20        | HepG2   |
| rs17883901 | chr6 | 53544032 | 53545336 | Transcription Factor  | Sin3Ak20        | H1ESC   |
| rs17883901 | chr6 | 53544067 | 53545400 | Polymerase PolII      | H1ESC           |         |
| rs17883901 | chr6 | 53544079 | 53545311 | Transcription Factor  | Rad21           | HepG2   |
| rs17883901 | chr6 | 53544085 | 53545525 | Histone H2AZ          | HSMMtube        |         |
| rs17883901 | chr6 | 53544118 | 53545400 | Transcription Factor  | Ini1            | HeLa-S3 |
| rs17883901 | chr6 | 53544130 | 53545325 | Polymerase PolII      | HeLa-S3         |         |
| rs17883901 | chr6 | 53544142 | 53545338 | Transcription Factor  | Jund            | H1ESC   |
| rs17883901 | chr6 | 53544165 | 53545391 | Transcription Factor  | CTCF            | HepG2   |
| rs17883901 | chr6 | 53544195 | 53545339 | Transcription Factor  | ZBTB7A          | K562    |
| rs17883901 | chr6 | 53544199 | 53545349 | Transcription Factor  | ETS1            | K562    |
| rs17883901 | chr6 | 53544206 | 53545429 | Open Chromatin DNase1 | HepG2           |         |
| rs17883901 | chr6 | 53544306 | 53545398 | Transcription Factor  | TAF1            | HepG2   |
| rs17883901 | chr6 | 53544314 | 53545431 | Open Chromatin DNase1 | H1ESC           |         |
| rs17883901 | chr6 | 53544325 | 53545354 | Transcription Factor  | ELF1            | GM12878 |
| rs17883901 | chr6 | 53544347 | 53545297 | Transcription Factor  | Yy1             | HepG2   |
| rs17883901 | chr6 | 53544361 | 53545260 | Transcription Factor  | TAF1            | HeLa-S3 |
| rs17883901 | chr6 | 53544368 | 53545511 | Transcription Factor  | Pax5            | GM12878 |
| rs17883901 | chr6 | 53544371 | 53545383 | Open Chromatin DNase1 | HUVEC           |         |
| rs17883901 | chr6 | 53544382 | 53545323 | Polymerase PolII      | K562            |         |
| rs17883901 | chr6 | 53544393 | 53545270 | Transcription Factor  | Yy1             | GM12891 |
| rs17883901 | chr6 | 53544399 | 53545268 | Transcription Factor  | Yy1             | H1ESC   |
| rs17883901 | chr6 | 53544413 | 53545267 | Transcription Factor  | ETS1            | GM12878 |
| rs17883901 | chr6 | 53544428 | 53545337 | Open Chromatin DNase1 | Monocytes-CD14+ |         |
| rs17883901 | chr6 | 53544429 | 53545355 | Polymerase PolII      | GM12878         |         |
| rs17883901 | chr6 | 53544437 | 53545370 | Transcription Factor  | USF1            | SKNSHRA |
| rs17883901 | chr6 | 53544462 | 53545327 | Open Chromatin DNase1 | NHDF-AD         |         |
| rs17883901 | chr6 | 53544470 | 53545242 | Transcription Factor  | Rad21           | H1ESC   |
| rs17883901 | chr6 | 53544471 | 53545372 | Open Chromatin DNase1 | GM12878         |         |
| rs17883901 | chr6 | 53544480 | 53545271 | Transcription Factor  | Sin3Ak20        | K562    |
| rs17883901 | chr6 | 53544487 | 53545338 | Transcription Factor  | TAF7            | H1ESC   |
| rs17883901 | chr6 | 53544493 | 53545403 | Open Chromatin DNase1 | HSMMtube        |         |
| rs17883901 | chr6 | 53544497 | 53545440 | Transcription Factor  | Yy1             | SKNSHRA |
| rs17883901 | chr6 | 53544507 | 53545256 | Transcription Factor  | p300            | HepG2   |
| rs17883901 | chr6 | 53544512 | 53545336 | Transcription Factor  | Yy1             | HCT116  |
| rs17883901 | chr6 | 53544515 | 53545366 | Open Chromatin DNase1 | NH-A            |         |
| rs17883901 | chr6 | 53544519 | 53545409 | Open Chromatin DNase1 | K562            |         |
| rs17883901 | chr6 | 53544531 | 53545394 | Open Chromatin DNase1 | NHLF            |         |
| rs17883901 | chr6 | 53544555 | 53545288 | Transcription Factor  | Rad21           | SKNSHRA |
| rs17883901 | chr6 | 53544579 | 53545291 | Transcription Factor  | Pax5            | GM12892 |
| rs17883901 | chr6 | 53544611 | 53545367 | Transcription Factor  | ELF1            | HepG2   |
| rs17883901 | chr6 | 53544617 | 53545339 | Transcription Factor  | SP1             | H1ESC   |
| rs17883901 | chr6 | 53544622 | 53545267 | Transcription Factor  | Pax5            | GM12891 |
| rs17883901 | chr6 | 53544630 | 53545380 | Transcription Factor  | Nrsf            | Panc1   |
| rs17883901 | chr6 | 53544702 | 53545353 | Transcription Factor  | SP1             | GM12878 |
| rs17883901 | chr6 | 53544761 | 53545797 | Histone H3K4me2       | H1ESC           |         |
| rs17883901 | chr6 | 53544804 | 53545282 | Transcription Factor  | Srf             | K562    |

|            |      |          |          |                       |        |         |
|------------|------|----------|----------|-----------------------|--------|---------|
| rs17883901 | chr6 | 53544850 | 53545381 | Transcription Factor  | ZBTB33 | HCT116  |
| rs17883901 | chr6 | 53544859 | 53545488 | Open Chromatin DNase1 | HSMM   |         |
| rs17883901 | chr6 | 53544867 | 53545260 | Transcription Factor  | ELF1   | K562    |
| rs17883901 | chr6 | 53544921 | 53545351 | Open Chromatin DNase1 | A549   |         |
| rs17883901 | chr6 | 53544922 | 53545420 | Transcription Factor  | Jund   | HepG2   |
| rs17883901 | chr6 | 53544933 | 53545357 | Transcription Factor  | HNf4G  | HepG2   |
| rs17883901 | chr6 | 53544957 | 53545385 | Transcription Factor  | SP1    | K562    |
| rs17883901 | chr6 | 53544970 | 53545513 | Transcription Factor  | Egr1   | K562    |
| rs17883901 | chr6 | 53544972 | 53545771 | Histone H3K4me2       | NHEK   |         |
| rs17883901 | chr6 | 53544972 | 53545379 | Transcription Factor  | Egr1   | GM12878 |
| rs17883901 | chr6 | 53545040 | 53548040 | Histone H3K4me1       | NHEK   |         |
| rs17883901 | chr6 | 53545060 | 53548020 | Histone H3K4me1       | HMEC   |         |
| rs17883901 | chr6 | 53545060 | 53548040 | Histone H3K4me1       | HepG2  |         |
| rs17883901 | chr6 | 53545123 | 53548003 | Histone H3K4me2       | A549   |         |
| rs17883901 | chr6 | 53545137 | 53545611 | Histone H3K4me2       | H1ESC  |         |
| rs17883901 | chr6 | 53545140 | 53545680 | Histone H3K4me1       | HUVEC  |         |
| rs17883901 | chr6 | 53545140 | 53549040 | Histone H3K4me1       | DND-41 |         |
| rs17883901 | chr6 | 53545142 | 53545629 | Histone H3K4me2       | K562   |         |
| rs17883901 | chr6 | 53545191 | 53545570 | Histone H3K27ac       | DND-41 |         |

#### Roadmap Epigenomics

| SNP        | Chromosome | Region Start | Region End | Feature Type Class    | Feature Type              | Epigenome |
|------------|------------|--------------|------------|-----------------------|---------------------------|-----------|
| rs17883901 | chr6       | 53541860     | 53546340   | Histone H3K4me1       | T cells (PB) Roadmap      |           |
| rs17883901 | chr6       | 53541860     | 53546340   | Histone H3K4me1       | T cells (PB) Roadmap      |           |
| rs17883901 | chr6       | 53542488     | 53545611   | Histone H3K4me3       | IMR90                     |           |
| rs17883901 | chr6       | 53542925     | 53545680   | Histone H3K4me3       | iPS-20b                   |           |
| rs17883901 | chr6       | 53543361     | 53545572   | Histone H3K4me3       | Fetal Stomach             |           |
| rs17883901 | chr6       | 53543361     | 53545572   | Histone H3K4me3       | Fetal Stomach             |           |
| rs17883901 | chr6       | 53543458     | 53545574   | Histone H3K4me3       | Fetal Intestine Large     |           |
| rs17883901 | chr6       | 53543458     | 53545574   | Histone H3K4me3       | Fetal Intestine Large     |           |
| rs17883901 | chr6       | 53543471     | 53545602   | Histone H3K27ac       | IMR90                     |           |
| rs17883901 | chr6       | 53543491     | 53545615   | Histone H3K4me3       | Right Atrium              |           |
| rs17883901 | chr6       | 53543491     | 53545615   | Histone H3K4me3       | Right Atrium              |           |
| rs17883901 | chr6       | 53543542     | 53545564   | Histone H3K4me3       | Fetal Adrenal Gland       |           |
| rs17883901 | chr6       | 53543542     | 53545564   | Histone H3K4me3       | Fetal Adrenal Gland       |           |
| rs17883901 | chr6       | 53543548     | 53545434   | Histone H3K4me3       | Ovary                     |           |
| rs17883901 | chr6       | 53543548     | 53545434   | Histone H3K4me3       | Ovary                     |           |
| rs17883901 | chr6       | 53543559     | 53545547   | Histone H3K4me3       | Thymus                    |           |
| rs17883901 | chr6       | 53543559     | 53545547   | Histone H3K4me3       | Thymus                    |           |
| rs17883901 | chr6       | 53543571     | 53545575   | Histone H3K4me3       | Psoas Muscle              |           |
| rs17883901 | chr6       | 53543654     | 53545521   | Histone H3K4me3       | Fetal Thymus              |           |
| rs17883901 | chr6       | 53543654     | 53545521   | Histone H3K4me3       | Fetal Thymus              |           |
| rs17883901 | chr6       | 53543697     | 53545399   | Histone H3K4me3       | iPS DF 19.11              |           |
| rs17883901 | chr6       | 53543697     | 53545399   | Histone H3K4me3       | iPS DF 19.11              |           |
| rs17883901 | chr6       | 53543852     | 53545477   | Histone H3K4me3       | Fetal Muscle Leg          |           |
| rs17883901 | chr6       | 53543852     | 53545477   | Histone H3K4me3       | Fetal Muscle Leg          |           |
| rs17883901 | chr6       | 53543880     | 53546540   | Histone H3K27me3      | Fetal Thymus              |           |
| rs17883901 | chr6       | 53543880     | 53546540   | Histone H3K27me3      | Fetal Thymus              |           |
| rs17883901 | chr6       | 53543885     | 53545415   | Histone H3K4me3       | Pancreas                  |           |
| rs17883901 | chr6       | 53543885     | 53545415   | Histone H3K4me3       | Pancreas                  |           |
| rs17883901 | chr6       | 53543982     | 53545517   | Histone H3K4me3       | B cells (PB) Roadmap      |           |
| rs17883901 | chr6       | 53543982     | 53545517   | Histone H3K4me3       | B cells (PB) Roadmap      |           |
| rs17883901 | chr6       | 53544077     | 53545393   | Histone H3K4me3       | H1-mesenchymal            |           |
| rs17883901 | chr6       | 53544077     | 53545393   | Histone H3K4me3       | H1-mesenchymal            |           |
| rs17883901 | chr6       | 53544534     | 53545401   | Open Chromatin DNase1 | IMR90                     |           |
| rs17883901 | chr6       | 53544700     | 53545560   | Histone H3K4me1       | Fetal Muscle Trunk        |           |
| rs17883901 | chr6       | 53544700     | 53545560   | Histone H3K4me1       | Fetal Muscle Trunk        |           |
| rs17883901 | chr6       | 53544759     | 53545607   | Histone H3K4me3       | Fetal Intestine Small     |           |
| rs17883901 | chr6       | 53544759     | 53545607   | Histone H3K4me3       | Fetal Intestine Small     |           |
| rs17883901 | chr6       | 53544760     | 53547000   | Histone H2AK5ac       | IMR90                     |           |
| rs17883901 | chr6       | 53544764     | 53545618   | Histone H3K4me2       | IMR90                     |           |
| rs17883901 | chr6       | 53544766     | 53545537   | Histone H3K4me3       | Natural Killer cells (PB) |           |
| rs17883901 | chr6       | 53544766     | 53545537   | Histone H3K4me3       | Natural Killer cells (PB) |           |

|            |      |          |          |                  |                              |
|------------|------|----------|----------|------------------|------------------------------|
| rs17883901 | chr6 | 53544772 | 53545528 | Histone H3K4me3  | Monocytes-CD14+ (PB) Roadmap |
| rs17883901 | chr6 | 53544772 | 53545528 | Histone H3K4me3  | Monocytes-CD14+ (PB) Roadmap |
| rs17883901 | chr6 | 53544792 | 53545502 | Histone H3K4me3  | T cells (PB) Roadmap         |
| rs17883901 | chr6 | 53544792 | 53545502 | Histone H3K4me3  | T cells (PB) Roadmap         |
| rs17883901 | chr6 | 53544909 | 53545559 | Histone H3K4me3  | Placenta                     |
| rs17883901 | chr6 | 53544909 | 53545559 | Histone H3K4me3  | Placenta                     |
| rs17883901 | chr6 | 53544960 | 53545740 | Histone H3K4me1  | Natural Killer cells (PB)    |
| rs17883901 | chr6 | 53544960 | 53545740 | Histone H3K4me1  | Natural Killer cells (PB)    |
| rs17883901 | chr6 | 53544960 | 53546200 | Histone H3K4me1  | Monocytes-CD14+ (PB) Roadmap |
| rs17883901 | chr6 | 53544960 | 53546200 | Histone H3K4me1  | Monocytes-CD14+ (PB) Roadmap |
| rs17883901 | chr6 | 53544960 | 53545960 | Histone H3K4me1  | Fetal Muscle Leg             |
| rs17883901 | chr6 | 53544960 | 53545960 | Histone H3K4me1  | Fetal Muscle Leg             |
| rs17883901 | chr6 | 53544960 | 53545320 | Histone H3K9me3  | Lung                         |
| rs17883901 | chr6 | 53544960 | 53545320 | Histone H3K9me3  | Lung                         |
| rs17883901 | chr6 | 53544980 | 53545580 | Histone H3K4me1  | Placenta                     |
| rs17883901 | chr6 | 53544980 | 53545580 | Histone H3K4me1  | Placenta                     |
| rs17883901 | chr6 | 53545000 | 53546000 | Histone H3K4me1  | B cells (PB) Roadmap         |
| rs17883901 | chr6 | 53545000 | 53546000 | Histone H3K4me1  | B cells (PB) Roadmap         |
| rs17883901 | chr6 | 53545000 | 53546780 | Histone H3K4me1  | Fetal Thymus                 |
| rs17883901 | chr6 | 53545000 | 53546780 | Histone H3K4me1  | Fetal Thymus                 |
| rs17883901 | chr6 | 53545020 | 53545360 | Histone H3K4me1  | H1-mesenchymal               |
| rs17883901 | chr6 | 53545020 | 53545360 | Histone H3K4me1  | H1-mesenchymal               |
| rs17883901 | chr6 | 53545100 | 53545820 | Histone H3K4me1  | Fetal Stomach                |
| rs17883901 | chr6 | 53545100 | 53545820 | Histone H3K4me1  | Fetal Stomach                |
| rs17883901 | chr6 | 53545120 | 53546480 | Histone H2BK12ac | IMR90                        |
| rs17883901 | chr6 | 53545160 | 53545320 | Histone H3K4me1  | H1-trophoblast               |
| rs17883901 | chr6 | 53545160 | 53545320 | Histone H3K4me1  | H1-trophoblast               |
| rs17883901 | chr6 | 53545160 | 53545640 | Histone H3K14ac  | IMR90                        |
| rs17883901 | chr6 | 53545180 | 53546140 | Histone H3K4me1  | Fetal Intestine Small        |
| rs17883901 | chr6 | 53545180 | 53546140 | Histone H3K4me1  | Fetal Intestine Small        |
| rs17883901 | chr6 | 53545193 | 53545544 | Histone H3K4me3  | Aorta                        |
| rs17883901 | chr6 | 53545193 | 53545544 | Histone H3K4me3  | Aorta                        |
| rs17883901 | chr6 | 53545203 | 53546422 | Histone H3K18ac  | IMR90                        |

#### Regulatory Build (Ensembl)

| SNP        | Chromosome | Region Start | Region End | Feature Type Class | Epigenome                | Activity |
|------------|------------|--------------|------------|--------------------|--------------------------|----------|
| rs17883901 | chr6       | 53543400     | 53545601   | Promoter A549      | POISED                   |          |
| rs17883901 | chr6       | 53543400     | 53545601   | Promoter Aorta     | ACTIVE                   |          |
| rs17883901 | chr6       | 53543400     | 53545601   | Promoter Aorta     | ACTIVE                   |          |
| rs17883901 | chr6       | 53543400     | 53545601   | Promoter           | B cells (PB) Roadmap     | ACTIVE   |
| rs17883901 | chr6       | 53543400     | 53545601   | Promoter           | B cells (PB) Roadmap     | ACTIVE   |
| rs17883901 | chr6       | 53543400     | 53545601   | Promoter           | CD14+CD16- monocyte (CB) | ACTIVE   |
| rs17883901 | chr6       | 53543400     | 53545601   | Promoter           | CD14+CD16- monocyte (VB) | ACTIVE   |
| rs17883901 | chr6       | 53543400     | 53545601   | Promoter           | CD4+ ab T cell (VB)      | ACTIVE   |
| rs17883901 | chr6       | 53543400     | 53545601   | Promoter           | CD8+ ab T cell (CB)      | ACTIVE   |
| rs17883901 | chr6       | 53543400     | 53545601   | Promoter           | CM CD4+ ab T cell (VB)   | ACTIVE   |
| rs17883901 | chr6       | 53543400     | 53545601   | Promoter           | DND-41                   | ACTIVE   |
| rs17883901 | chr6       | 53543400     | 53545601   | Promoter           | eosinophil (VB)          | ACTIVE   |
| rs17883901 | chr6       | 53543400     | 53545601   | Promoter           | EPC (VB)                 | ACTIVE   |
| rs17883901 | chr6       | 53543400     | 53545601   | Promoter           | erythroblast (CB)        | ACTIVE   |
| rs17883901 | chr6       | 53543400     | 53545601   | Promoter           | Fetal Adrenal Gland      | ACTIVE   |
| rs17883901 | chr6       | 53543400     | 53545601   | Promoter           | Fetal Adrenal Gland      | ACTIVE   |
| rs17883901 | chr6       | 53543400     | 53545601   | Promoter           | Fetal Intestine Large    | ACTIVE   |
| rs17883901 | chr6       | 53543400     | 53545601   | Promoter           | Fetal Intestine Large    | ACTIVE   |
| rs17883901 | chr6       | 53543400     | 53545601   | Promoter           | Fetal Intestine Small    | ACTIVE   |
| rs17883901 | chr6       | 53543400     | 53545601   | Promoter           | Fetal Intestine Small    | ACTIVE   |
| rs17883901 | chr6       | 53543400     | 53545601   | Promoter           | Fetal Muscle Leg         | ACTIVE   |
| rs17883901 | chr6       | 53543400     | 53545601   | Promoter           | Fetal Muscle Leg         | ACTIVE   |
| rs17883901 | chr6       | 53543400     | 53545601   | Promoter           | Fetal Muscle Trunk       | ACTIVE   |
| rs17883901 | chr6       | 53543400     | 53545601   | Promoter           | Fetal Muscle Trunk       | ACTIVE   |
| rs17883901 | chr6       | 53543400     | 53545601   | Promoter           | Fetal Stomach            | ACTIVE   |
| rs17883901 | chr6       | 53543400     | 53545601   | Promoter           | Fetal Stomach            | ACTIVE   |
| rs17883901 | chr6       | 53543400     | 53545601   | Promoter           | Fetal Thymus             | ACTIVE   |

|            |      |          |          |          |                              |        |
|------------|------|----------|----------|----------|------------------------------|--------|
| rs17883901 | chr6 | 53543400 | 53545601 | Promoter | Fetal Thymus                 | ACTIVE |
| rs17883901 | chr6 | 53543400 | 53545601 | Promoter | Gastric                      | ACTIVE |
| rs17883901 | chr6 | 53543400 | 53545601 | Promoter | Gastric                      | ACTIVE |
| rs17883901 | chr6 | 53543400 | 53545601 | Promoter | GM12878                      | ACTIVE |
| rs17883901 | chr6 | 53543400 | 53545601 | Promoter | H1-mesenchymal               | ACTIVE |
| rs17883901 | chr6 | 53543400 | 53545601 | Promoter | H1-mesenchymal               | ACTIVE |
| rs17883901 | chr6 | 53543400 | 53545601 | Promoter | H1-neuronal progenitor       | POISED |
| rs17883901 | chr6 | 53543400 | 53545601 | Promoter | H1-neuronal progenitor       | POISED |
| rs17883901 | chr6 | 53543400 | 53545601 | Promoter | H1-trophoblast               | ACTIVE |
| rs17883901 | chr6 | 53543400 | 53545601 | Promoter | H1-trophoblast               | ACTIVE |
| rs17883901 | chr6 | 53543400 | 53545601 | Promoter | H1ESC                        | POISED |
| rs17883901 | chr6 | 53543400 | 53545601 | Promoter | H9                           | POISED |
| rs17883901 | chr6 | 53543400 | 53545601 | Promoter | H9                           | POISED |
| rs17883901 | chr6 | 53543400 | 53545601 | Promoter | HeLa-S3                      | ACTIVE |
| rs17883901 | chr6 | 53543400 | 53545601 | Promoter | HepG2                        | ACTIVE |
| rs17883901 | chr6 | 53543400 | 53545601 | Promoter | HMEC                         | ACTIVE |
| rs17883901 | chr6 | 53543400 | 53545601 | Promoter | HSMM                         | ACTIVE |
| rs17883901 | chr6 | 53543400 | 53545601 | Promoter | HSMMtube                     | ACTIVE |
| rs17883901 | chr6 | 53543400 | 53545601 | Promoter | HUVEC                        | ACTIVE |
| rs17883901 | chr6 | 53543400 | 53545601 | Promoter | HUVEC prol (CB)              | ACTIVE |
| rs17883901 | chr6 | 53543400 | 53545601 | Promoter | IMR90                        | ACTIVE |
| rs17883901 | chr6 | 53543400 | 53545601 | Promoter | iPS-20b                      | POISED |
| rs17883901 | chr6 | 53543400 | 53545601 | Promoter | iPS DF 19.11                 | ACTIVE |
| rs17883901 | chr6 | 53543400 | 53545601 | Promoter | iPS DF 19.11                 | ACTIVE |
| rs17883901 | chr6 | 53543400 | 53545601 | Promoter | iPS DF 6.9                   | ACTIVE |
| rs17883901 | chr6 | 53543400 | 53545601 | Promoter | iPS DF 6.9                   | ACTIVE |
| rs17883901 | chr6 | 53543400 | 53545601 | Promoter | K562                         | ACTIVE |
| rs17883901 | chr6 | 53543400 | 53545601 | Promoter | Left Ventricle               | ACTIVE |
| rs17883901 | chr6 | 53543400 | 53545601 | Promoter | Left Ventricle               | ACTIVE |
| rs17883901 | chr6 | 53543400 | 53545601 | Promoter | Lung                         | ACTIVE |
| rs17883901 | chr6 | 53543400 | 53545601 | Promoter | Lung                         | ACTIVE |
| rs17883901 | chr6 | 53543400 | 53545601 | Promoter | M0 macrophage (CB)           | ACTIVE |
| rs17883901 | chr6 | 53543400 | 53545601 | Promoter | M0 macrophage (VB)           | ACTIVE |
| rs17883901 | chr6 | 53543400 | 53545601 | Promoter | M1 macrophage (CB)           | ACTIVE |
| rs17883901 | chr6 | 53543400 | 53545601 | Promoter | M1 macrophage (VB)           | ACTIVE |
| rs17883901 | chr6 | 53543400 | 53545601 | Promoter | M2 macrophage (CB)           | ACTIVE |
| rs17883901 | chr6 | 53543400 | 53545601 | Promoter | M2 macrophage (VB)           | ACTIVE |
| rs17883901 | chr6 | 53543400 | 53545601 | Promoter | Monocytes-CD14+              | POISED |
| rs17883901 | chr6 | 53543400 | 53545601 | Promoter | Monocytes-CD14+ (PB) Roadmap | ACTIVE |
| rs17883901 | chr6 | 53543400 | 53545601 | Promoter | Monocytes-CD14+ (PB) Roadmap | ACTIVE |
| rs17883901 | chr6 | 53543400 | 53545601 | Promoter | MSC (VB)                     | ACTIVE |
| rs17883901 | chr6 | 53543400 | 53545601 | Promoter | naive B cell (VB)            | ACTIVE |
| rs17883901 | chr6 | 53543400 | 53545601 | Promoter | Natural Killer cells (PB)    | ACTIVE |
| rs17883901 | chr6 | 53543400 | 53545601 | Promoter | Natural Killer cells (PB)    | ACTIVE |
| rs17883901 | chr6 | 53543400 | 53545601 | Promoter | neutrophil (CB)              | POISED |
| rs17883901 | chr6 | 53543400 | 53545601 | Promoter | neutrophil myelocyte (BM)    | ACTIVE |
| rs17883901 | chr6 | 53543400 | 53545601 | Promoter | neutrophil (VB)              | POISED |
| rs17883901 | chr6 | 53543400 | 53545601 | Promoter | NH-A                         | POISED |
| rs17883901 | chr6 | 53543400 | 53545601 | Promoter | NHDF-AD                      | ACTIVE |
| rs17883901 | chr6 | 53543400 | 53545601 | Promoter | NHEK                         | ACTIVE |
| rs17883901 | chr6 | 53543400 | 53545601 | Promoter | NHLF                         | ACTIVE |
| rs17883901 | chr6 | 53543400 | 53545601 | Promoter | Osteobl                      | POISED |
| rs17883901 | chr6 | 53543400 | 53545601 | Promoter | Ovary                        | ACTIVE |
| rs17883901 | chr6 | 53543400 | 53545601 | Promoter | Ovary                        | ACTIVE |
| rs17883901 | chr6 | 53543400 | 53545601 | Promoter | Pancreas                     | ACTIVE |
| rs17883901 | chr6 | 53543400 | 53545601 | Promoter | Pancreas                     | ACTIVE |
| rs17883901 | chr6 | 53543400 | 53545601 | Promoter | Placenta                     | ACTIVE |
| rs17883901 | chr6 | 53543400 | 53545601 | Promoter | Placenta                     | ACTIVE |
| rs17883901 | chr6 | 53543400 | 53545601 | Promoter | Psoas Muscle                 | ACTIVE |
| rs17883901 | chr6 | 53543400 | 53545601 | Promoter | Right Atrium                 | ACTIVE |
| rs17883901 | chr6 | 53543400 | 53545601 | Promoter | Right Atrium                 | ACTIVE |
| rs17883901 | chr6 | 53543400 | 53545601 | Promoter | Small Intestine              | ACTIVE |
| rs17883901 | chr6 | 53543400 | 53545601 | Promoter | Small Intestine              | ACTIVE |



|            |      |          |          |          |                      |        |
|------------|------|----------|----------|----------|----------------------|--------|
| rs17883901 | chr6 | 53543400 | 53545601 | Promoter | Spleen               | ACTIVE |
| rs17883901 | chr6 | 53543400 | 53545601 | Promoter | Spleen               | ACTIVE |
| rs17883901 | chr6 | 53543400 | 53545601 | Promoter | T cells (PB) Roadmap | ACTIVE |
| rs17883901 | chr6 | 53543400 | 53545601 | Promoter | T cells (PB) Roadmap | ACTIVE |
| rs17883901 | chr6 | 53543400 | 53545601 | Promoter | Thymus               | ACTIVE |
| rs17883901 | chr6 | 53543400 | 53545601 | Promoter | Thymus               | ACTIVE |

### rs606548

#### ENCODE

| SNP      | Chromosome | Region Start | Region End | Feature Type Class | Feature Type    | Epigenome |
|----------|------------|--------------|------------|--------------------|-----------------|-----------|
| rs606548 | chr6       | 53521880     | 53544680   | Histone H3K79me2   | HepG2           |           |
| rs606548 | chr6       | 53532340     | 53544820   | Histone H3K79me2   | GM12878         |           |
| rs606548 | chr6       | 53536380     | 53544020   | Histone H3K4me1    | HepG2           |           |
| rs606548 | chr6       | 53536700     | 53538460   | Histone H3K4me1    | NHEK            |           |
| rs606548 | chr6       | 53537600     | 53544540   | Histone H4K20me1   | Monocytes-CD14+ |           |
| rs606548 | chr6       | 53537660     | 53538120   | Histone H3K79me2   | HeLa-S3         |           |
| rs606548 | chr6       | 53537700     | 53538060   | Histone H4K20me1   | HepG2           |           |
| rs606548 | chr6       | 53537740     | 53538060   | Histone H3K4me1    | A549            |           |
| rs606548 | chr6       | 53537840     | 53538060   | Histone H3K36me3   | HepG2           |           |
| rs606548 | chr6       | 53537860     | 53538080   | Histone H4K20me1   | A549            |           |
| rs606548 | chr6       | 53537880     | 53538160   | Histone H3K79me2   | HSMMtube        |           |

#### Roadmap Epigenomics

| SNP      | Chromosome | Region Start | Region End | Feature Type Class | Feature Type | Epigenome |
|----------|------------|--------------|------------|--------------------|--------------|-----------|
| rs606548 | chr6       | 53537720     | 53537980   | Histone H3K4me1    | iPS-20b      |           |

### rs636933

#### ENCODE

| SNP      | Chromosome | Region Start | Region End | Feature Type Class | Feature Type    | Epigenome |
|----------|------------|--------------|------------|--------------------|-----------------|-----------|
| rs636933 | chr6       | 53511880     | 53517920   | Histone H3K4me1    | HepG2           |           |
| rs636933 | chr6       | 53511940     | 53517280   | Histone H3K36me3   | Monocytes-CD14+ |           |
| rs636933 | chr6       | 53511940     | 53517080   | Histone H3K4me1    | A549            |           |
| rs636933 | chr6       | 53512040     | 53517960   | Histone H3K36me3   | DND-41          |           |
| rs636933 | chr6       | 53512080     | 53514320   | Histone H3K36me3   | A549            |           |
| rs636933 | chr6       | 53512400     | 53515700   | Histone H3K36me3   | HMEC            |           |
| rs636933 | chr6       | 53512420     | 53514360   | Histone H3K36me3   | HepG2           |           |
| rs636933 | chr6       | 53513020     | 53517100   | Histone H3K36me3   | NHEK            |           |
| rs636933 | chr6       | 53513080     | 53513680   | Histone H3K36me3   | GM12878         |           |
| rs636933 | chr6       | 53513120     | 53513400   | Histone H4K20me1   | A549            |           |
| rs636933 | chr6       | 53513200     | 53513740   | Histone H3K36me3   | HUVEC           |           |

#### Roadmap Epigenomics

| SNP      | Chromosome | Region Start | Region End | Feature Type Class | Feature Type                 | Epigenome |
|----------|------------|--------------|------------|--------------------|------------------------------|-----------|
| rs636933 | chr6       | 53511900     | 53517980   | Histone H3K36me3   | Monocytes-CD14+ (PB) Roadmap |           |
| rs636933 | chr6       | 53511900     | 53517980   | Histone H3K36me3   | Monocytes-CD14+ (PB) Roadmap |           |
| rs636933 | chr6       | 53511900     | 53517140   | Histone H3K4me1    | Fetal Intestine Small        |           |
| rs636933 | chr6       | 53511900     | 53517140   | Histone H3K4me1    | Fetal Intestine Small        |           |
| rs636933 | chr6       | 53511939     | 53513891   | Histone H3K27ac    | Fetal Intestine Small        |           |
| rs636933 | chr6       | 53511939     | 53513891   | Histone H3K27ac    | Fetal Intestine Small        |           |
| rs636933 | chr6       | 53511940     | 53515020   | Histone H3K36me3   | T cells (PB) Roadmap         |           |
| rs636933 | chr6       | 53511940     | 53515020   | Histone H3K36me3   | T cells (PB) Roadmap         |           |
| rs636933 | chr6       | 53511940     | 53517700   | Histone H3K4me1    | Fetal Intestine Large        |           |
| rs636933 | chr6       | 53511940     | 53517700   | Histone H3K4me1    | Fetal Intestine Large        |           |
| rs636933 | chr6       | 53512010     | 53514327   | Histone H3K27ac    | Fetal Intestine Large        |           |
| rs636933 | chr6       | 53512010     | 53514327   | Histone H3K27ac    | Fetal Intestine Large        |           |
| rs636933 | chr6       | 53512020     | 53517100   | Histone H3K36me3   | iPS-20b                      |           |
| rs636933 | chr6       | 53512060     | 53517100   | Histone H3K36me3   | B cells (PB) Roadmap         |           |

|          |      |          |          |                  |                           |
|----------|------|----------|----------|------------------|---------------------------|
| rs636933 | chr6 | 53512060 | 53517100 | Histone H3K36me3 | B cells (PB) Roadmap      |
| rs636933 | chr6 | 53512080 | 53515720 | Histone H3K36me3 | Natural Killer cells (PB) |
| rs636933 | chr6 | 53512080 | 53515720 | Histone H3K36me3 | Natural Killer cells (PB) |
| rs636933 | chr6 | 53512120 | 53514900 | Histone H3K36me3 | Placenta                  |
| rs636933 | chr6 | 53512120 | 53514900 | Histone H3K36me3 | Placenta                  |
| rs636933 | chr6 | 53512380 | 53517340 | Histone H3K36me3 | Fetal Adrenal Gland       |
| rs636933 | chr6 | 53512380 | 53517340 | Histone H3K36me3 | Fetal Adrenal Gland       |
| rs636933 | chr6 | 53512380 | 53514680 | Histone H3K36me3 | Fetal Thymus              |
| rs636933 | chr6 | 53512380 | 53514680 | Histone H3K36me3 | Fetal Thymus              |
| rs636933 | chr6 | 53513020 | 53515080 | Histone H3K4me1  | Fetal Stomach             |
| rs636933 | chr6 | 53513020 | 53515080 | Histone H3K4me1  | Fetal Stomach             |
| rs636933 | chr6 | 53513020 | 53513800 | Histone H3K36me3 | Fetal Muscle Trunk        |
| rs636933 | chr6 | 53513020 | 53513800 | Histone H3K36me3 | Fetal Muscle Trunk        |
| rs636933 | chr6 | 53513020 | 53513840 | Histone H2AK5ac  | IMR90                     |
| rs636933 | chr6 | 53513040 | 53513980 | Histone H3K36me3 | Fetal Muscle Leg          |
| rs636933 | chr6 | 53513040 | 53513980 | Histone H3K36me3 | Fetal Muscle Leg          |
| rs636933 | chr6 | 53513040 | 53513440 | Histone H3K4me1  | H1-mesenchymal            |
| rs636933 | chr6 | 53513040 | 53513440 | Histone H3K4me1  | H1-mesenchymal            |
| rs636933 | chr6 | 53513060 | 53513880 | Histone H3K36me3 | Thymus                    |
| rs636933 | chr6 | 53513060 | 53513880 | Histone H3K36me3 | Thymus                    |
| rs636933 | chr6 | 53513060 | 53513380 | Histone H3K4me1  | IMR90                     |
| rs636933 | chr6 | 53513080 | 53513740 | Histone H3K36me3 | Spleen                    |
| rs636933 | chr6 | 53513080 | 53513740 | Histone H3K36me3 | Spleen                    |
| rs636933 | chr6 | 53513080 | 53513700 | Histone H3K4me1  | Pancreas                  |
| rs636933 | chr6 | 53513080 | 53513700 | Histone H3K4me1  | Pancreas                  |
| rs636933 | chr6 | 53513080 | 53513780 | Histone H3K36me3 | Fetal Intestine Small     |
| rs636933 | chr6 | 53513080 | 53513780 | Histone H3K36me3 | Fetal Intestine Small     |
| rs636933 | chr6 | 53513100 | 53513840 | Histone H3K36me3 | Fetal Stomach             |
| rs636933 | chr6 | 53513100 | 53513840 | Histone H3K36me3 | Fetal Stomach             |
| rs636933 | chr6 | 53513100 | 53513400 | Histone H3K36me3 | H1-mesenchymal            |
| rs636933 | chr6 | 53513100 | 53513400 | Histone H3K36me3 | H1-mesenchymal            |
| rs636933 | chr6 | 53513140 | 53513400 | Histone H3K36me3 | H1-trophoblast            |
| rs636933 | chr6 | 53513140 | 53513400 | Histone H3K36me3 | H1-trophoblast            |
| rs636933 | chr6 | 53513140 | 53513640 | Histone H2BK12ac | IMR90                     |
| rs636933 | chr6 | 53513160 | 53513420 | Histone H3K4me1  | Gastric                   |
| rs636933 | chr6 | 53513160 | 53513420 | Histone H3K4me1  | Gastric                   |
| rs636933 | chr6 | 53513180 | 53513420 | Histone H4K8ac   | IMR90                     |
| rs636933 | chr6 | 53513220 | 53513820 | Histone H3K36me3 | Fetal Intestine Large     |
| rs636933 | chr6 | 53513220 | 53513820 | Histone H3K36me3 | Fetal Intestine Large     |
| rs636933 | chr6 | 53513240 | 53513680 | Histone H3K14ac  | IMR90                     |

## rs648595

### ENCODE

| SNP      | Chromosome | Region Start | Region End | Feature Type Class   | Feature Type    | Epigenome |
|----------|------------|--------------|------------|----------------------|-----------------|-----------|
| rs648595 | chr6       | 53511880     | 53517920   | Histone H3K4me1      | HepG2           |           |
| rs648595 | chr6       | 53511940     | 53517280   | Histone H3K36me3     | Monocytes-CD14+ |           |
| rs648595 | chr6       | 53511940     | 53517080   | Histone H3K4me1      | A549            |           |
| rs648595 | chr6       | 53512040     | 53517960   | Histone H3K36me3     | DND-41          |           |
| rs648595 | chr6       | 53512080     | 53514320   | Histone H3K36me3     | A549            |           |
| rs648595 | chr6       | 53512400     | 53515700   | Histone H3K36me3     | HMEC            |           |
| rs648595 | chr6       | 53512420     | 53514360   | Histone H3K36me3     | HepG2           |           |
| rs648595 | chr6       | 53513020     | 53517100   | Histone H3K36me3     | NHEK            |           |
| rs648595 | chr6       | 53513080     | 53513680   | Histone H3K36me3     | GM12878         |           |
| rs648595 | chr6       | 53513200     | 53513740   | Histone H3K36me3     | HUVEC           |           |
| rs648595 | chr6       | 53513478     | 53513892   | Transcription Factor | FOXA1 HepG2     |           |

### Roadmap Epigenomics

| SNP      | Chromosome | Region Start | Region End | Feature Type Class | Feature Type                 | Epigenome |
|----------|------------|--------------|------------|--------------------|------------------------------|-----------|
| rs648595 | chr6       | 53511900     | 53517980   | Histone H3K36me3   | Monocytes-CD14+ (PB) Roadmap |           |
| rs648595 | chr6       | 53511900     | 53517980   | Histone H3K36me3   | Monocytes-CD14+ (PB) Roadmap |           |

|          |      |          |          |                  |                           |
|----------|------|----------|----------|------------------|---------------------------|
| rs648595 | chr6 | 53511900 | 53517140 | Histone H3K4me1  | Fetal Intestine Small     |
| rs648595 | chr6 | 53511900 | 53517140 | Histone H3K4me1  | Fetal Intestine Small     |
| rs648595 | chr6 | 53511939 | 53513891 | Histone H3K27ac  | Fetal Intestine Small     |
| rs648595 | chr6 | 53511939 | 53513891 | Histone H3K27ac  | Fetal Intestine Small     |
| rs648595 | chr6 | 53511940 | 53515020 | Histone H3K36me3 | T cells (PB) Roadmap      |
| rs648595 | chr6 | 53511940 | 53515020 | Histone H3K36me3 | T cells (PB) Roadmap      |
| rs648595 | chr6 | 53511940 | 53517700 | Histone H3K4me1  | Fetal Intestine Large     |
| rs648595 | chr6 | 53511940 | 53517700 | Histone H3K4me1  | Fetal Intestine Large     |
| rs648595 | chr6 | 53512010 | 53514327 | Histone H3K27ac  | Fetal Intestine Large     |
| rs648595 | chr6 | 53512010 | 53514327 | Histone H3K27ac  | Fetal Intestine Large     |
| rs648595 | chr6 | 53512020 | 53517100 | Histone H3K36me3 | iPS-20b                   |
| rs648595 | chr6 | 53512060 | 53517100 | Histone H3K36me3 | B cells (PB) Roadmap      |
| rs648595 | chr6 | 53512060 | 53517100 | Histone H3K36me3 | B cells (PB) Roadmap      |
| rs648595 | chr6 | 53512080 | 53515720 | Histone H3K36me3 | Natural Killer cells (PB) |
| rs648595 | chr6 | 53512080 | 53515720 | Histone H3K36me3 | Natural Killer cells (PB) |
| rs648595 | chr6 | 53512120 | 53514900 | Histone H3K36me3 | Placenta                  |
| rs648595 | chr6 | 53512120 | 53514900 | Histone H3K36me3 | Placenta                  |
| rs648595 | chr6 | 53512380 | 53517340 | Histone H3K36me3 | Fetal Adrenal Gland       |
| rs648595 | chr6 | 53512380 | 53517340 | Histone H3K36me3 | Fetal Adrenal Gland       |
| rs648595 | chr6 | 53512380 | 53514680 | Histone H3K36me3 | Fetal Thymus              |
| rs648595 | chr6 | 53512380 | 53514680 | Histone H3K36me3 | Fetal Thymus              |
| rs648595 | chr6 | 53513020 | 53515080 | Histone H3K4me1  | Fetal Stomach             |
| rs648595 | chr6 | 53513020 | 53515080 | Histone H3K4me1  | Fetal Stomach             |
| rs648595 | chr6 | 53513020 | 53513800 | Histone H3K36me3 | Fetal Muscle Trunk        |
| rs648595 | chr6 | 53513020 | 53513800 | Histone H3K36me3 | Fetal Muscle Trunk        |
| rs648595 | chr6 | 53513020 | 53513840 | Histone H2AK5ac  | IMR90                     |
| rs648595 | chr6 | 53513040 | 53513980 | Histone H3K36me3 | Fetal Muscle Leg          |
| rs648595 | chr6 | 53513040 | 53513980 | Histone H3K36me3 | Fetal Muscle Leg          |
| rs648595 | chr6 | 53513060 | 53513880 | Histone H3K36me3 | Thymus                    |
| rs648595 | chr6 | 53513060 | 53513880 | Histone H3K36me3 | Thymus                    |
| rs648595 | chr6 | 53513080 | 53513740 | Histone H3K36me3 | Spleen                    |
| rs648595 | chr6 | 53513080 | 53513740 | Histone H3K36me3 | Spleen                    |
| rs648595 | chr6 | 53513080 | 53513700 | Histone H3K4me1  | Pancreas                  |
| rs648595 | chr6 | 53513080 | 53513700 | Histone H3K4me1  | Pancreas                  |
| rs648595 | chr6 | 53513080 | 53513780 | Histone H3K36me3 | Fetal Intestine Small     |
| rs648595 | chr6 | 53513080 | 53513780 | Histone H3K36me3 | Fetal Intestine Small     |
| rs648595 | chr6 | 53513100 | 53513840 | Histone H3K36me3 | Fetal Stomach             |
| rs648595 | chr6 | 53513100 | 53513840 | Histone H3K36me3 | Fetal Stomach             |
| rs648595 | chr6 | 53513140 | 53513640 | Histone H2BK12ac | IMR90                     |
| rs648595 | chr6 | 53513220 | 53513820 | Histone H3K36me3 | Fetal Intestine Large     |
| rs648595 | chr6 | 53513220 | 53513820 | Histone H3K36me3 | Fetal Intestine Large     |
| rs648595 | chr6 | 53513240 | 53513680 | Histone H3K14ac  | IMR90                     |
| rs648595 | chr6 | 53513480 | 53513700 | Histone H3K4me1  | Gastric                   |
| rs648595 | chr6 | 53513480 | 53513700 | Histone H3K4me1  | Gastric                   |
| rs648595 | chr6 | 53513480 | 53513800 | Histone H3K36me3 | Left Ventricle            |
| rs648595 | chr6 | 53513480 | 53513800 | Histone H3K36me3 | Left Ventricle            |
| rs648595 | chr6 | 53513480 | 53513680 | Histone H3K36me3 | H1-mesenchymal            |
| rs648595 | chr6 | 53513480 | 53513680 | Histone H3K36me3 | H1-mesenchymal            |
| rs648595 | chr6 | 53513520 | 53513680 | Histone H3K36me3 | H1-trophoblast            |
| rs648595 | chr6 | 53513520 | 53513680 | Histone H3K36me3 | H1-trophoblast            |

## rs761142

### ENCODE

| SNP      | Chromosome | Region Start | Region End | Feature Type Class | Feature Type    | Epigenome |
|----------|------------|--------------|------------|--------------------|-----------------|-----------|
| rs761142 | chr6       | 53521880     | 53544680   | Histone H3K79me2   | HepG2           |           |
| rs761142 | chr6       | 53522220     | 53528440   | Histone H3K4me1    | NHEK            |           |
| rs761142 | chr6       | 53522440     | 53528560   | Histone H3K4me1    | HepG2           |           |
| rs761142 | chr6       | 53523863     | 53528261   | Histone H3K4me2    | A549            |           |
| rs761142 | chr6       | 53525520     | 53527840   | Histone H3K4me1    | HMEC            |           |
| rs761142 | chr6       | 53525960     | 53528020   | Histone H3K4me1    | Monocytes-CD14+ |           |
| rs761142 | chr6       | 53526720     | 53528480   | Histone H4K20me1   | Monocytes-CD14+ |           |



|          |      |          |          |                  |         |
|----------|------|----------|----------|------------------|---------|
| rs761142 | chr6 | 53526720 | 53528440 | Histone H3K4me1  | A549    |
| rs761142 | chr6 | 53526800 | 53527940 | Histone H3K79me2 | GM12878 |
| rs761142 | chr6 | 53526820 | 53528100 | Histone H3K79me2 | HeLa-S3 |
| rs761142 | chr6 | 53526980 | 53528020 | Histone H4K20me1 | DND-41  |
| rs761142 | chr6 | 53527000 | 53528040 | Histone H4K20me1 | A549    |
| rs761142 | chr6 | 53527080 | 53527680 | Histone H3K36me3 | NHEK    |
| rs761142 | chr6 | 53527100 | 53527340 | Histone H4K20me1 | NH-A    |

#### Roadmap Epigenomics

| SNP      | Chromosome | Region Start | Region End | Feature Type Class | Feature Type                 | Epigenome |
|----------|------------|--------------|------------|--------------------|------------------------------|-----------|
| rs761142 | chr6       | 53523140     | 53527420   | Histone H3K4me1    | Fetal Adrenal Gland          |           |
| rs761142 | chr6       | 53523140     | 53527420   | Histone H3K4me1    | Fetal Adrenal Gland          |           |
| rs761142 | chr6       | 53525660     | 53528080   | Histone H2AK5ac    | IMR90                        |           |
| rs761142 | chr6       | 53526080     | 53527940   | Histone H3K4me1    | Monocytes-CD14+ (PB) Roadmap |           |
| rs761142 | chr6       | 53526080     | 53527940   | Histone H3K4me1    | Monocytes-CD14+ (PB) Roadmap |           |
| rs761142 | chr6       | 53526720     | 53528420   | Histone H3K4me1    | iPS-20b                      |           |
| rs761142 | chr6       | 53526800     | 53527520   | Histone H3K4me1    | Fetal Intestine Small        |           |
| rs761142 | chr6       | 53526800     | 53527520   | Histone H3K4me1    | Fetal Intestine Small        |           |
| rs761142 | chr6       | 53526920     | 53528120   | Histone H3K79me2   | IMR90                        |           |
| rs761142 | chr6       | 53526940     | 53528040   | Histone H3K4me1    | iPS DF 19.11                 |           |
| rs761142 | chr6       | 53526940     | 53528040   | Histone H3K4me1    | iPS DF 19.11                 |           |
| rs761142 | chr6       | 53526940     | 53527340   | Histone H2BK12ac   | IMR90                        |           |
| rs761142 | chr6       | 53526960     | 53528180   | Histone H3K4me1    | H9                           |           |
| rs761142 | chr6       | 53526960     | 53528180   | Histone H3K4me1    | H9                           |           |
| rs761142 | chr6       | 53526960     | 53528080   | Histone H3K4me1    | H1-neuronal progenitor       |           |
| rs761142 | chr6       | 53526960     | 53528080   | Histone H3K4me1    | H1-neuronal progenitor       |           |
| rs761142 | chr6       | 53526960     | 53528060   | Histone H3K14ac    | IMR90                        |           |
| rs761142 | chr6       | 53526980     | 53527420   | Histone H4K8ac     | IMR90                        |           |
| rs761142 | chr6       | 53527000     | 53528060   | Histone H3K4me1    | Right Atrium                 |           |
| rs761142 | chr6       | 53527000     | 53528060   | Histone H3K4me1    | Right Atrium                 |           |
| rs761142 | chr6       | 53527000     | 53527360   | Histone H3K4me1    | H1-mesenchymal               |           |
| rs761142 | chr6       | 53527000     | 53527360   | Histone H3K4me1    | H1-mesenchymal               |           |
| rs761142 | chr6       | 53527000     | 53528020   | Histone H3K4me1    | Psoas Muscle                 |           |
| rs761142 | chr6       | 53527000     | 53527380   | Histone H3K4me1    | H1-trophoblast               |           |
| rs761142 | chr6       | 53527000     | 53527380   | Histone H3K4me1    | H1-trophoblast               |           |
| rs761142 | chr6       | 53527020     | 53527960   | Histone H3K4me1    | Pancreas                     |           |
| rs761142 | chr6       | 53527020     | 53527960   | Histone H3K4me1    | Pancreas                     |           |
| rs761142 | chr6       | 53527020     | 53527660   | Histone H3K4me1    | Gastric                      |           |
| rs761142 | chr6       | 53527020     | 53527660   | Histone H3K4me1    | Gastric                      |           |
| rs761142 | chr6       | 53527040     | 53527360   | Histone H3K4me1    | iPS DF 6.9                   |           |
| rs761142 | chr6       | 53527040     | 53527360   | Histone H3K4me1    | iPS DF 6.9                   |           |
| rs761142 | chr6       | 53527060     | 53527860   | Histone H3K4me1    | IMR90                        |           |
| rs761142 | chr6       | 53527100     | 53528020   | Histone H3K4me1    | Left Ventricle               |           |
| rs761142 | chr6       | 53527100     | 53528020   | Histone H3K4me1    | Left Ventricle               |           |
| rs761142 | chr6       | 53527120     | 53527360   | Histone H3K9me3    | H9                           |           |
| rs761142 | chr6       | 53527120     | 53527360   | Histone H3K9me3    | H9                           |           |

#### rs2301022

#### ENCODE

| SNP       | Chromosome | Region Start | Region End | Feature Type Class | Feature Type | Epigenome |
|-----------|------------|--------------|------------|--------------------|--------------|-----------|
| rs2301022 | chr1       | 93901500     | 93909200   | Histone H3K79me2   | HSMMtube     |           |
| rs2301022 | chr1       | 93902480     | 93909540   | Histone H3K79me2   | K562         |           |
| rs2301022 | chr1       | 93903040     | 93909080   | Histone H3K79me2   | HeLa-S3      |           |
| rs2301022 | chr1       | 93903360     | 93909100   | Histone H3K79me2   | HSMM         |           |
| rs2301022 | chr1       | 93903540     | 93909560   | Histone H3K79me2   | GM12878      |           |
| rs2301022 | chr1       | 93903660     | 93908920   | Histone H3K79me2   | HepG2        |           |
| rs2301022 | chr1       | 93903780     | 93909060   | Histone H3K4me1    | DND-41       |           |
| rs2301022 | chr1       | 93903800     | 93908800   | Histone H3K4me1    | HUVEC        |           |
| rs2301022 | chr1       | 93903800     | 93908900   | Histone H3K4me1    | HepG2        |           |
| rs2301022 | chr1       | 93903847     | 93908853   | Histone H3K4me2    | A549         |           |

|           |      |          |          |                  |         |
|-----------|------|----------|----------|------------------|---------|
| rs2301022 | chr1 | 93904000 | 93908660 | Histone H3K4me1  | HeLa-S3 |
| rs2301022 | chr1 | 93904100 | 93908880 | Histone H3K4me1  | Osteobl |
| rs2301022 | chr1 | 93904160 | 93908900 | Histone H3K4me1  | NHEK    |
| rs2301022 | chr1 | 93904675 | 93909591 | Histone H3K4me2  | HMEC    |
| rs2301022 | chr1 | 93904920 | 93907380 | Histone H3K4me1  | NHDF-AD |
| rs2301022 | chr1 | 93905003 | 93909485 | Histone H3K4me3  | A549    |
| rs2301022 | chr1 | 93905195 | 93909175 | Histone H3K4me2  | HUVEC   |
| rs2301022 | chr1 | 93905485 | 93908978 | Histone H3K4me2  | HeLa-S3 |
| rs2301022 | chr1 | 93905729 | 93910151 | Histone H3K4me3  | HMEC    |
| rs2301022 | chr1 | 93905729 | 93909488 | Histone H3K9ac   | A549    |
| rs2301022 | chr1 | 93906027 | 93909512 | Histone H3K27ac  | HMEC    |
| rs2301022 | chr1 | 93906136 | 93910658 | Histone H3K4me2  | DND-41  |
| rs2301022 | chr1 | 93906200 | 93908200 | Histone H4K20me1 | NH-A    |
| rs2301022 | chr1 | 93906219 | 93909606 | Histone H3K27ac  | A549    |
| rs2301022 | chr1 | 93906238 | 93910361 | Histone H3K4me2  | NH-A    |
| rs2301022 | chr1 | 93906648 | 93909504 | Histone H3K4me2  | HSMM    |
| rs2301022 | chr1 | 93906680 | 93909561 | Histone H3K4me2  | HepG2   |
| rs2301022 | chr1 | 93906700 | 93908340 | Histone H4K20me1 | Osteobl |
| rs2301022 | chr1 | 93906746 | 93909213 | Histone H3K4me2  | NHEK    |
| rs2301022 | chr1 | 93906797 | 93909178 | Histone H3K4me2  | Osteobl |
| rs2301022 | chr1 | 93906840 | 93907560 | Histone H3K36me3 | HSMM    |
| rs2301022 | chr1 | 93906960 | 93908420 | Histone H3K4me1  | NH-A    |
| rs2301022 | chr1 | 93906960 | 93907400 | Histone H3K36me3 | A549    |
| rs2301022 | chr1 | 93906972 | 93910335 | Histone H3K4me3  | K562    |
| rs2301022 | chr1 | 93907020 | 93907460 | Histone H3K4me1  | NHLF    |
| rs2301022 | chr1 | 93907025 | 93909163 | Histone H3K4me2  | NHDF-AD |
| rs2301022 | chr1 | 93907044 | 93909639 | Histone H3K4me3  | GM12878 |
| rs2301022 | chr1 | 93907112 | 93910196 | Histone H3K4me3  | Osteobl |
| rs2301022 | chr1 | 93907171 | 93910515 | Histone H3K4me3  | DND-41  |
| rs2301022 | chr1 | 93907283 | 93909538 | Histone H3K4me2  | K562    |

#### Roadmap Epigenomics

| SNP       | Chromosome | Region Start | Region End | Feature Type Class | Feature Type | Epigenome |
|-----------|------------|--------------|------------|--------------------|--------------|-----------|
| rs2301022 | chr1       | 93906769     | 93910261   | Histone H3K4me2    | IMR90        |           |
| rs2301022 | chr1       | 93906951     | 93910116   | Histone H3K4me3    | IMR90        |           |
| rs2301022 | chr1       | 93907020     | 93907400   | Histone H3K14ac    | IMR90        |           |
| rs2301022 | chr1       | 93907180     | 93908320   | Histone H3K4me1    | iPS-20b      |           |

#### rs3827715

#### ENCODE

| SNP       | Chromosome | Region Start | Region End | Feature Type Class | Feature Type    | Epigenome |
|-----------|------------|--------------|------------|--------------------|-----------------|-----------|
| rs3827715 | chr1       | 93901500     | 93909200   | Histone H3K79me2   | HSMMtube        |           |
| rs3827715 | chr1       | 93902480     | 93909540   | Histone H3K79me2   | K562            |           |
| rs3827715 | chr1       | 93903040     | 93909080   | Histone H3K79me2   | HeLa-S3         |           |
| rs3827715 | chr1       | 93903360     | 93909100   | Histone H3K79me2   | HSMM            |           |
| rs3827715 | chr1       | 93903400     | 93905820   | Histone H3K4me1    | Monocytes-CD14+ |           |
| rs3827715 | chr1       | 93903400     | 93904700   | Histone H3K36me3   | DND-41          |           |
| rs3827715 | chr1       | 93903440     | 93905580   | Histone H3K4me1    | A549            |           |
| rs3827715 | chr1       | 93903500     | 93904480   | Histone H3K36me3   | HMEC            |           |
| rs3827715 | chr1       | 93903540     | 93909560   | Histone H3K79me2   | GM12878         |           |
| rs3827715 | chr1       | 93903580     | 93904100   | Histone H3K36me3   | Osteobl         |           |
| rs3827715 | chr1       | 93903660     | 93908920   | Histone H3K79me2   | HepG2           |           |
| rs3827715 | chr1       | 93903700     | 93906580   | Histone H3K4me1    | HMEC            |           |
| rs3827715 | chr1       | 93903700     | 93904540   | Histone H3K36me3   | NHEK            |           |
| rs3827715 | chr1       | 93903718     | 93904844   | Histone H2AZ       | GM12878         |           |
| rs3827715 | chr1       | 93903760     | 93904900   | Histone H3K36me3   | A549            |           |
| rs3827715 | chr1       | 93903780     | 93909060   | Histone H3K4me1    | DND-41          |           |
| rs3827715 | chr1       | 93903780     | 93904380   | Histone H4K20me1   | NH-A            |           |
| rs3827715 | chr1       | 93903800     | 93908800   | Histone H3K4me1    | HUVEC           |           |
| rs3827715 | chr1       | 93903800     | 93908900   | Histone H3K4me1    | HepG2           |           |

|           |      |          |          |                  |                 |
|-----------|------|----------|----------|------------------|-----------------|
| rs3827715 | chr1 | 93903800 | 93904480 | Histone H4K20me1 | A549            |
| rs3827715 | chr1 | 93903847 | 93908853 | Histone H3K4me2  | A549            |
| rs3827715 | chr1 | 93903899 | 93904381 | Histone H3K27ac  | Monocytes-CD14+ |
| rs3827715 | chr1 | 93903900 | 93904580 | Histone H3K36me3 | HSMM            |
| rs3827715 | chr1 | 93903900 | 93904360 | Histone H3K4me1  | GM12878         |
| rs3827715 | chr1 | 93904000 | 93908660 | Histone H3K4me1  | HeLa-S3         |

#### Roadmap Epigenomics

| SNP       | Chromosome | Region Start | Region End | Feature Type Class | Feature Type                 | Epigenome |
|-----------|------------|--------------|------------|--------------------|------------------------------|-----------|
| rs3827715 | chr1       | 93903300     | 93905340   | Histone H3K4me1    | Natural Killer cells (PB)    |           |
| rs3827715 | chr1       | 93903300     | 93905340   | Histone H3K4me1    | Natural Killer cells (PB)    |           |
| rs3827715 | chr1       | 93903420     | 93905640   | Histone H3K4me1    | Fetal Adrenal Gland          |           |
| rs3827715 | chr1       | 93903420     | 93905640   | Histone H3K4me1    | Fetal Adrenal Gland          |           |
| rs3827715 | chr1       | 93903540     | 93905560   | Histone H3K4me1    | B cells (PB) Roadmap         |           |
| rs3827715 | chr1       | 93903540     | 93905560   | Histone H3K4me1    | B cells (PB) Roadmap         |           |
| rs3827715 | chr1       | 93903660     | 93905620   | Histone H3K4me1    | Monocytes-CD14+ (PB) Roadmap |           |
| rs3827715 | chr1       | 93903660     | 93905620   | Histone H3K4me1    | Monocytes-CD14+ (PB) Roadmap |           |
| rs3827715 | chr1       | 93903780     | 93904860   | Histone H3K36me3   | iPS-20b                      |           |
| rs3827715 | chr1       | 93903798     | 93904922   | Histone H3K27ac    | T cells (PB) Roadmap         |           |
| rs3827715 | chr1       | 93903798     | 93904922   | Histone H3K27ac    | T cells (PB) Roadmap         |           |
| rs3827715 | chr1       | 93903845     | 93905338   | Histone H3K27ac    | Natural Killer cells (PB)    |           |
| rs3827715 | chr1       | 93903845     | 93905338   | Histone H3K27ac    | Natural Killer cells (PB)    |           |
| rs3827715 | chr1       | 93903860     | 93904620   | Histone H3K14ac    | IMR90                        |           |

#### Regulatory Build (Ensembl)

| SNP       | Chromosome | Region Start | Region End | Feature Type Class       | Epigenome                | Activity |
|-----------|------------|--------------|------------|--------------------------|--------------------------|----------|
| rs3827715 | chr1       | 93904001     | 93905200   | Promoter Flanking Region | A549                     | POISED   |
| rs3827715 | chr1       | 93904001     | 93905200   | Promoter Flanking Region | Aorta                    | INACTIVE |
| rs3827715 | chr1       | 93904001     | 93905200   | Promoter Flanking Region | Aorta                    | INACTIVE |
| rs3827715 | chr1       | 93904001     | 93905200   | Promoter Flanking Region | B cells (PB) Roadmap     | INACTIVE |
| rs3827715 | chr1       | 93904001     | 93905200   | Promoter Flanking Region | B cells (PB) Roadmap     | INACTIVE |
| rs3827715 | chr1       | 93904001     | 93905200   | Promoter Flanking Region | CD14+CD16- monocyte (CB) | ACTIVE   |
| rs3827715 | chr1       | 93904001     | 93905200   | Promoter Flanking Region | CD14+CD16- monocyte (VB) | INACTIVE |
| rs3827715 | chr1       | 93904001     | 93905200   | Promoter Flanking Region | CD4+ ab T cell (VB)      | INACTIVE |
| rs3827715 | chr1       | 93904001     | 93905200   | Promoter Flanking Region | CD8+ ab T cell (CB)      | INACTIVE |
| rs3827715 | chr1       | 93904001     | 93905200   | Promoter Flanking Region | CM CD4+ ab T cell (VB)   | INACTIVE |
| rs3827715 | chr1       | 93904001     | 93905200   | Promoter Flanking Region | DND-41                   | ACTIVE   |
| rs3827715 | chr1       | 93904001     | 93905200   | Promoter Flanking Region | eosinophil (VB)          | INACTIVE |
| rs3827715 | chr1       | 93904001     | 93905200   | Promoter Flanking Region | EPC (VB)                 | INACTIVE |
| rs3827715 | chr1       | 93904001     | 93905200   | Promoter Flanking Region | erythroblast (CB)        | INACTIVE |
| rs3827715 | chr1       | 93904001     | 93905200   | Promoter Flanking Region | Fetal Adrenal Gland      | INACTIVE |
| rs3827715 | chr1       | 93904001     | 93905200   | Promoter Flanking Region | Fetal Adrenal Gland      | INACTIVE |
| rs3827715 | chr1       | 93904001     | 93905200   | Promoter Flanking Region | Fetal Intestine Large    | INACTIVE |
| rs3827715 | chr1       | 93904001     | 93905200   | Promoter Flanking Region | Fetal Intestine Large    | INACTIVE |
| rs3827715 | chr1       | 93904001     | 93905200   | Promoter Flanking Region | Fetal Intestine Small    | INACTIVE |
| rs3827715 | chr1       | 93904001     | 93905200   | Promoter Flanking Region | Fetal Intestine Small    | INACTIVE |
| rs3827715 | chr1       | 93904001     | 93905200   | Promoter Flanking Region | Fetal Muscle Leg         | INACTIVE |
| rs3827715 | chr1       | 93904001     | 93905200   | Promoter Flanking Region | Fetal Muscle Leg         | INACTIVE |
| rs3827715 | chr1       | 93904001     | 93905200   | Promoter Flanking Region | Fetal Muscle Trunk       | INACTIVE |
| rs3827715 | chr1       | 93904001     | 93905200   | Promoter Flanking Region | Fetal Muscle Trunk       | INACTIVE |
| rs3827715 | chr1       | 93904001     | 93905200   | Promoter Flanking Region | Fetal Stomach            | INACTIVE |
| rs3827715 | chr1       | 93904001     | 93905200   | Promoter Flanking Region | Fetal Stomach            | INACTIVE |
| rs3827715 | chr1       | 93904001     | 93905200   | Promoter Flanking Region | Fetal Thymus             | INACTIVE |
| rs3827715 | chr1       | 93904001     | 93905200   | Promoter Flanking Region | Fetal Thymus             | INACTIVE |
| rs3827715 | chr1       | 93904001     | 93905200   | Promoter Flanking Region | Gastric                  | INACTIVE |
| rs3827715 | chr1       | 93904001     | 93905200   | Promoter Flanking Region | Gastric                  | INACTIVE |
| rs3827715 | chr1       | 93904001     | 93905200   | Promoter Flanking Region | GM12878                  | ACTIVE   |
| rs3827715 | chr1       | 93904001     | 93905200   | Promoter Flanking Region | H1-mesenchymal           | INACTIVE |
| rs3827715 | chr1       | 93904001     | 93905200   | Promoter Flanking Region | H1-mesenchymal           | INACTIVE |
| rs3827715 | chr1       | 93904001     | 93905200   | Promoter Flanking Region | H1-neuronal progenitor   | INACTIVE |
| rs3827715 | chr1       | 93904001     | 93905200   | Promoter Flanking Region | H1-neuronal progenitor   | INACTIVE |
| rs3827715 | chr1       | 93904001     | 93905200   | Promoter Flanking Region | H1-trophoblast           | INACTIVE |
| rs3827715 | chr1       | 93904001     | 93905200   | Promoter Flanking Region | H1-trophoblast           | INACTIVE |
| rs3827715 | chr1       | 93904001     | 93905200   | Promoter Flanking Region | H1ESC                    | INACTIVE |

|           |      |          |          |                          |                              |           |
|-----------|------|----------|----------|--------------------------|------------------------------|-----------|
| rs3827715 | chr1 | 93904001 | 93905200 | Promoter Flanking Region | H9                           | INACTIVE  |
| rs3827715 | chr1 | 93904001 | 93905200 | Promoter Flanking Region | H9                           | INACTIVE  |
| rs3827715 | chr1 | 93904001 | 93905200 | Promoter Flanking Region | HeLa-S3                      | INACTIVE  |
| rs3827715 | chr1 | 93904001 | 93905200 | Promoter Flanking Region | HepG2                        | INACTIVE  |
| rs3827715 | chr1 | 93904001 | 93905200 | Promoter Flanking Region | HMEC                         | ACTIVE    |
| rs3827715 | chr1 | 93904001 | 93905200 | Promoter Flanking Region | HSMM                         | INACTIVE  |
| rs3827715 | chr1 | 93904001 | 93905200 | Promoter Flanking Region | HSMMtube                     | INACTIVE  |
| rs3827715 | chr1 | 93904001 | 93905200 | Promoter Flanking Region | HUVEC                        | ACTIVE    |
| rs3827715 | chr1 | 93904001 | 93905200 | Promoter Flanking Region | HUVEC prol (CB)              | INACTIVE  |
| rs3827715 | chr1 | 93904001 | 93905200 | Promoter Flanking Region | IMR90                        | POISED    |
| rs3827715 | chr1 | 93904001 | 93905200 | Promoter Flanking Region | iPS-20b                      | INACTIVE  |
| rs3827715 | chr1 | 93904001 | 93905200 | Promoter Flanking Region | iPS DF 19.11                 | INACTIVE  |
| rs3827715 | chr1 | 93904001 | 93905200 | Promoter Flanking Region | iPS DF 19.11                 | INACTIVE  |
| rs3827715 | chr1 | 93904001 | 93905200 | Promoter Flanking Region | iPS DF 6.9                   | INACTIVE  |
| rs3827715 | chr1 | 93904001 | 93905200 | Promoter Flanking Region | iPS DF 6.9                   | INACTIVE  |
| rs3827715 | chr1 | 93904001 | 93905200 | Promoter Flanking Region | K562                         | REPRESSED |
| rs3827715 | chr1 | 93904001 | 93905200 | Promoter Flanking Region | Left Ventricle               | INACTIVE  |
| rs3827715 | chr1 | 93904001 | 93905200 | Promoter Flanking Region | Left Ventricle               | INACTIVE  |
| rs3827715 | chr1 | 93904001 | 93905200 | Promoter Flanking Region | Lung                         | INACTIVE  |
| rs3827715 | chr1 | 93904001 | 93905200 | Promoter Flanking Region | Lung                         | INACTIVE  |
| rs3827715 | chr1 | 93904001 | 93905200 | Promoter Flanking Region | M0 macrophage (CB)           | INACTIVE  |
| rs3827715 | chr1 | 93904001 | 93905200 | Promoter Flanking Region | M0 macrophage (VB)           | ACTIVE    |
| rs3827715 | chr1 | 93904001 | 93905200 | Promoter Flanking Region | M1 macrophage (CB)           | INACTIVE  |
| rs3827715 | chr1 | 93904001 | 93905200 | Promoter Flanking Region | M1 macrophage (VB)           | ACTIVE    |
| rs3827715 | chr1 | 93904001 | 93905200 | Promoter Flanking Region | M2 macrophage (CB)           | INACTIVE  |
| rs3827715 | chr1 | 93904001 | 93905200 | Promoter Flanking Region | M2 macrophage (VB)           | INACTIVE  |
| rs3827715 | chr1 | 93904001 | 93905200 | Promoter Flanking Region | Monocytes-CD14+              | ACTIVE    |
| rs3827715 | chr1 | 93904001 | 93905200 | Promoter Flanking Region | Monocytes-CD14+ (PB) Roadmap | INACTIVE  |
| rs3827715 | chr1 | 93904001 | 93905200 | Promoter Flanking Region | Monocytes-CD14+ (PB) Roadmap | INACTIVE  |
| rs3827715 | chr1 | 93904001 | 93905200 | Promoter Flanking Region | MSC (VB)                     | INACTIVE  |
| rs3827715 | chr1 | 93904001 | 93905200 | Promoter Flanking Region | naive B cell (VB)            | ACTIVE    |
| rs3827715 | chr1 | 93904001 | 93905200 | Promoter Flanking Region | Natural Killer cells (PB)    | INACTIVE  |
| rs3827715 | chr1 | 93904001 | 93905200 | Promoter Flanking Region | Natural Killer cells (PB)    | INACTIVE  |
| rs3827715 | chr1 | 93904001 | 93905200 | Promoter Flanking Region | neutrophil (CB)              | INACTIVE  |
| rs3827715 | chr1 | 93904001 | 93905200 | Promoter Flanking Region | neutrophil myelocyte (BM)    | INACTIVE  |
| rs3827715 | chr1 | 93904001 | 93905200 | Promoter Flanking Region | neutrophil (VB)              | ACTIVE    |
| rs3827715 | chr1 | 93904001 | 93905200 | Promoter Flanking Region | NH-A                         | REPRESSED |
| rs3827715 | chr1 | 93904001 | 93905200 | Promoter Flanking Region | NHDF-AD                      | INACTIVE  |
| rs3827715 | chr1 | 93904001 | 93905200 | Promoter Flanking Region | NHEK                         | INACTIVE  |
| rs3827715 | chr1 | 93904001 | 93905200 | Promoter Flanking Region | NHLF                         | INACTIVE  |
| rs3827715 | chr1 | 93904001 | 93905200 | Promoter Flanking Region | Osteobl                      | INACTIVE  |
| rs3827715 | chr1 | 93904001 | 93905200 | Promoter Flanking Region | Ovary                        | INACTIVE  |
| rs3827715 | chr1 | 93904001 | 93905200 | Promoter Flanking Region | Ovary                        | INACTIVE  |
| rs3827715 | chr1 | 93904001 | 93905200 | Promoter Flanking Region | Pancreas                     | INACTIVE  |
| rs3827715 | chr1 | 93904001 | 93905200 | Promoter Flanking Region | Pancreas                     | INACTIVE  |
| rs3827715 | chr1 | 93904001 | 93905200 | Promoter Flanking Region | Placenta                     | INACTIVE  |
| rs3827715 | chr1 | 93904001 | 93905200 | Promoter Flanking Region | Placenta                     | INACTIVE  |
| rs3827715 | chr1 | 93904001 | 93905200 | Promoter Flanking Region | Psoas Muscle                 | INACTIVE  |
| rs3827715 | chr1 | 93904001 | 93905200 | Promoter Flanking Region | Right Atrium                 | INACTIVE  |
| rs3827715 | chr1 | 93904001 | 93905200 | Promoter Flanking Region | Right Atrium                 | INACTIVE  |
| rs3827715 | chr1 | 93904001 | 93905200 | Promoter Flanking Region | Small Intestine              | INACTIVE  |
| rs3827715 | chr1 | 93904001 | 93905200 | Promoter Flanking Region | Small Intestine              | INACTIVE  |
| rs3827715 | chr1 | 93904001 | 93905200 | Promoter Flanking Region | Spleen                       | INACTIVE  |
| rs3827715 | chr1 | 93904001 | 93905200 | Promoter Flanking Region | Spleen                       | INACTIVE  |
| rs3827715 | chr1 | 93904001 | 93905200 | Promoter Flanking Region | T cells (PB) Roadmap         | INACTIVE  |
| rs3827715 | chr1 | 93904001 | 93905200 | Promoter Flanking Region | T cells (PB) Roadmap         | INACTIVE  |
| rs3827715 | chr1 | 93904001 | 93905200 | Promoter Flanking Region | Thymus                       | INACTIVE  |
| rs3827715 | chr1 | 93904001 | 93905200 | Promoter Flanking Region | Thymus                       | INACTIVE  |

## rs7517826

### ENCODE

| SNP       | Chromosome | Region Start | Region End | Feature Type Class | Feature Type | Epigenome |
|-----------|------------|--------------|------------|--------------------|--------------|-----------|
| rs7517826 | chr1       | 93892080     | 93901680   | Histone H3K36me3   | Osteobl      |           |
| rs7517826 | chr1       | 93898500     | 93902040   | Histone H3K36me3   | DND-41       |           |
| rs7517826 | chr1       | 93898500     | 93901700   | Histone H3K36me3   | A549         |           |
| rs7517826 | chr1       | 93899200     | 93899900   | Histone H3K36me3   | HMEC         |           |
| rs7517826 | chr1       | 93899720     | 93900260   | Histone H3K36me3   | HepG2        |           |

## Roadmap Epigenomics

| SNP       | Chromosome | Region Start | Region End | Feature Type | Class    | Feature Type        | Epigenome |
|-----------|------------|--------------|------------|--------------|----------|---------------------|-----------|
| rs7517826 | chr1       | 93898420     | 93899820   | Histone      | H3K36me3 | Fetal Adrenal Gland |           |
| rs7517826 | chr1       | 93898420     | 93899820   | Histone      | H3K36me3 | Fetal Adrenal Gland |           |
| rs7517826 | chr1       | 93899280     | 93899920   | Histone      | H3K36me3 | iPS-20b             |           |
| rs7517826 | chr1       | 93899500     | 93901940   | Histone      | H3K36me3 | Placenta            |           |
| rs7517826 | chr1       | 93899500     | 93901940   | Histone      | H3K36me3 | Placenta            |           |

\* NH-A normal human astrocytes

Epigenetic signatures in brain tissues or aorta are highlighted by yellow
