# Supplementary material for: The Impact of Genetic Polymorphisms in Glutamate-Cysteine Ligase, a Key Enzyme of Glutathione Biosynthesis, on Ischemic Stroke Risk and Brain Infarct Size
Source: MDPI journal article supplement (doi:10.3390/life12040602), 2022-04-18
Supplement: s1 [file s1]

**Statistics for all *mbmdr*-models of G×G and G×E interactions associated with the risk of  
ischemic stroke\***

| Risk factors/SNPs     | Number of <i>n</i> -order models, n (%) |      |          |      |           |      |           |      |
|-----------------------|-----------------------------------------|------|----------|------|-----------|------|-----------|------|
|                       | 2n (75)                                 | %    | 3n (492) | %    | 4n (1999) | %    | 5n (8541) | %    |
| Smoking               | 19                                      | 12,7 | 154      | 10,4 | 709       | 8,9  | 2949      | 6,9  |
| Alcohol               | 15                                      | 10,0 | 69       | 4,7  | 270       | 3,4  | 1657      | 3,9  |
| Fruit/Vegetable       | 7                                       | 4,7  | 73       | 4,9  | 293       | 3,7  | 1747      | 4,1  |
| rs12524494            | 4                                       | 2,7  | 56       | 3,8  | 294       | 3,7  | 2195      | 5,1  |
| rs17883901            | 5                                       | 3,3  | 69       | 4,7  | 387       | 4,8  | 2152      | 5,0  |
| rs606548              | 5                                       | 3,3  | 66       | 4,5  | 372       | 4,7  | 2203      | 5,2  |
| rs636933              | 3                                       | 2,0  | 51       | 3,5  | 328       | 4,1  | 1849      | 4,3  |
| rs648595              | 7                                       | 4,7  | 71       | 4,8  | 412       | 5,2  | 2188      | 5,1  |
| rs761142              | 4                                       | 2,7  | 55       | 3,7  | 345       | 4,3  | 1912      | 4,5  |
| rs2301022             | 19                                      | 12,7 | 147      | 10,0 | 723       | 9,0  | 2853      | 6,7  |
| rs3827715             | 5                                       | 3,3  | 65       | 4,4  | 368       | 4,6  | 1983      | 4,6  |
| rs7517826             | 5                                       | 3,3  | 56       | 3,8  | 351       | 4,4  | 1920      | 4,5  |
| rs11556924            | 6                                       | 4,0  | 68       | 4,6  | 416       | 5,2  | 2123      | 5,0  |
| rs12449964            | 5                                       | 3,3  | 46       | 3,1  | 317       | 4,0  | 1900      | 4,4  |
| rs12646447            | 4                                       | 2,7  | 56       | 3,8  | 378       | 4,7  | 2212      | 5,2  |
| rs2417957             | 4                                       | 2,7  | 55       | 3,7  | 265       | 3,3  | 1865      | 4,4  |
| rs4322086             | 19                                      | 12,7 | 155      | 10,5 | 761       | 9,5  | 3159      | 7,4  |
| rs6511720             | 6                                       | 4,0  | 61       | 4,1  | 375       | 4,7  | 2219      | 5,2  |
| rs783396              | 4                                       | 2,7  | 53       | 3,6  | 326       | 4,1  | 1839      | 4,3  |
| rs899997              | 4                                       | 2,7  | 50       | 3,4  | 306       | 3,8  | 1787      | 4,2  |
| Summary statistics:   |                                         |      |          |      |           |      |           |      |
| Risk factors          | 41                                      | 27,3 | 296      | 20,1 | 1272      | 15,9 | 6353      | 14,9 |
| <i>GCLM/GCLC</i> SNPs | 57                                      | 38,0 | 636      | 43,1 | 3580      | 44,8 | 19255     | 45,1 |
| GWAS SNPs             | 52                                      | 34,7 | 544      | 36,9 | 3144      | 39,3 | 17104     | 40,0 |

\*G×G (SNP×SNP) and G×E (SNP×risk factor) interactions were analyzed by the model-based multifactor dimensionality reduction (*mbmdr*) method (Calle et al, 2010).
