# Supplementary material for: The Impact of Genetic Polymorphisms in Glutamate-Cysteine Ligase, a Key Enzyme of Glutathione Biosynthesis, on Ischemic Stroke Risk and Brain Infarct Size
Source: MDPI journal article supplement (doi:10.3390/life12040602), 2022-04-18
Supplement: s1 [file s1]

**Statistics for the best *mbmdr*-models of G×G and G×E interactions associated with  
brain infarct size\***

| Risk factors/SNPs     | Number of <i>n</i> -order models, n (%) |      |         |      |          |      |          |      |
|-----------------------|-----------------------------------------|------|---------|------|----------|------|----------|------|
|                       | 2n (7)                                  | %    | 3n (27) | %    | 4n (131) | %    | 5n (536) | %    |
| Smoking               | 2                                       | 14,3 | 7       | 8,6  | 26       | 5,0  | 565      | 5,3  |
| Alcohol               | 0                                       | 0,0  | 3       | 3,7  | 13       | 2,5  | 380      | 3,5  |
| Fruit/Vegetable       | 0                                       | 0,0  | 2       | 2,5  | 16       | 3,1  | 369      | 3,4  |
| rs12524494            | 0                                       | 0,0  | 0       | 0,0  | 12       | 2,3  | 315      | 2,9  |
| rs17883901            | 0                                       | 0,0  | 4       | 4,9  | 33       | 6,3  | 828      | 7,7  |
| rs606548              | 1                                       | 7,1  | 1       | 1,2  | 26       | 5,0  | 562      | 5,2  |
| rs636933              | 0                                       | 0,0  | 5       | 6,2  | 30       | 5,7  | 612      | 5,7  |
| rs648595              | 1                                       | 7,1  | 9       | 11,1 | 36       | 6,9  | 565      | 5,3  |
| rs761142              | 0                                       | 0,0  | 2       | 2,5  | 18       | 3,4  | 433      | 4,0  |
| rs2301022             | 1                                       | 7,1  | 4       | 4,9  | 35       | 6,7  | 727      | 6,8  |
| rs3827715             | 0                                       | 0,0  | 4       | 4,9  | 33       | 6,3  | 581      | 5,4  |
| rs7517826             | 0                                       | 0,0  | 1       | 1,2  | 16       | 3,1  | 444      | 4,1  |
| rs11556924            | 1                                       | 7,1  | 5       | 6,2  | 52       | 9,9  | 898      | 8,4  |
| rs12449964            | 0                                       | 0,0  | 4       | 4,9  | 27       | 5,2  | 536      | 5,0  |
| rs12646447            | 2                                       | 14,3 | 17      | 21,0 | 63       | 12,0 | 815      | 7,6  |
| rs2417957             | 2                                       | 14,3 | 9       | 11,1 | 46       | 8,8  | 830      | 7,7  |
| rs4322086             | 4                                       | 28,6 | 3       | 3,7  | 19       | 3,6  | 265      | 2,5  |
| rs6511720             | 0                                       | 0,0  | 1       | 1,2  | 8        | 1,5  | 306      | 2,9  |
| rs783396              | 0                                       | 0,0  | 0       | 0,0  | 5        | 1,0  | 353      | 3,3  |
| rs899997              | 0                                       | 0,0  | 0       | 0,0  | 10       | 1,9  | 331      | 3,1  |
| Summary statistics:   |                                         |      |         |      |          |      |          |      |
| Risk factors          | 2                                       | 14,3 | 12      | 14,8 | 55       | 10,5 | 1314     | 12,3 |
| <i>GCLM/GCLC</i> SNPs | 3                                       | 21,4 | 30      | 37,0 | 239      | 45,6 | 5067     | 47,3 |
| GWAS SNPs             | 9                                       | 64,3 | 39      | 48,1 | 230      | 43,9 | 4334     | 40,4 |

\*G×G (SNP×SNP) and G×E (SNP×risk factor) interactions were analyzed by the model-based multifactor dimensionality reduction (*mbmdr*) method (Calle et al, 2010).

The best *mbmdr*-models include the 25% of models with the lowest permutation *P*-values.
