# Supplementary material for: The Impact of Genetic Polymorphisms in Glutamate-Cysteine Ligase, a Key Enzyme of Glutathione Biosynthesis, on Ischemic Stroke Risk and Brain Infarct Size
Source: MDPI journal article supplement (doi:10.3390/life12040602), 2022-04-18
Supplement: s1 [file s1]

Supplementary table S5

**The results of *cis* eQTL data analysis for SNPs of *GCLC* and *GCLM* genes**

| SNP ID     | Effective Allele | Effect size | Z-score | P-value    | FDR      | Tissue                          | Database |
|------------|------------------|-------------|---------|------------|----------|---------------------------------|----------|
| rs12524494 | G                | NA          | -8.59   | 8.5023e-18 | 0        | Blood                           | eQTLGen  |
| rs12524494 | NA               | -0.14       | NA      | 2.100e-6   | 2.640e-4 | Blood                           | QTLbase  |
| rs17883901 | A                | 0.24        | NA      | 0.000001   | NA       | Adipose - Visceral              | GTEEx    |
| rs17883901 | A                | 0.21        | NA      | 0.000009   | NA       | Adipose - Subcutaneous          | GTEEx    |
| rs17883901 | G                | -1.07       | NA      | 3.840e-26  | NA       | Adipose-Subcutaneous            | QTLbase  |
| rs606548   | T                | NA          | -8.04   | 8.7809e-16 | 0        | Blood                           | eQTLGen  |
| rs606548   | T                | NA          | NA      | 8.780e-16  | 0        | Blood                           | QTLbase  |
| rs636933   | NA               | -0.10       | NA      | 1.020e-7   | 1.620e-5 | Blood                           | QTLbase  |
| rs636933   | A                | -0.16       | NA      | 2.3e-7     | NA       | Testis                          | GTEEx    |
| rs636933   | A                | -0.23       | NA      | 9.5e-7     | NA       | Skin - Not Sun Exposed          | GTEEx    |
| rs636933   | A                | -0.32       | NA      | 0.0000016  | NA       | Adrenal Gland                   | GTEEx    |
| rs636933   | A                | 0.24        | NA      | 0.000036   | NA       | Pancreas                        | GTEEx    |
| rs636933   | A                | -0.25       | NA      | 0.000051   | NA       | Brain - Caudate (basal ganglia) | GTEEx    |
| rs636933   | A                | NA          | -10.63  | 2.1381e-26 | 0        | Blood                           | eQTLGen  |
| rs648595   | G                | NA          | NA      | 1.160e-70  | NA       | Blood                           | QTLbase  |
| rs648595   | NA               | NA          | NA      | 2.960e-31  | NA       | Brain-Prefrontal Cortex         | QTLbase  |
| rs648595   | G                | -0.43       | NA      | 6.020e-14  | NA       | Adrenal Gland                   | QTLbase  |
| rs648595   | NA               | 0.04        | NA      | 1.280e-7   | 9.580e-6 | Brain-Prefrontal Cortex         | QTLbase  |
| rs648595   | NA               | 0.36        | NA      | 1.360e-7   | 9.510e-5 | Liver                           | QTLbase  |
| rs648595   | G                | -0.09       | NA      | 8.720e-7   | 0.0058   | Blood                           | QTLbase  |
| rs648595   | G                | -0.21       | NA      | 4.210e-6   | NA       | Brain-Hippocampus               | QTLbase  |
| rs648595   | G                | -0.43       | NA      | 1.6e-15    | NA       | Adrenal Gland                   | GTEEx    |
| rs648595   | G                | -0.18       | NA      | 1.1e-12    | NA       | Testis                          | GTEEx    |
| rs648595   | G                | -0.23       | NA      | 4.3e-9     | NA       | Skin - Not Sun Exposed          | GTEEx    |
| rs648595   | G                | -0.21       | NA      | 1.1e-7     | NA       | Nerve - Tibial                  | GTEEx    |
| rs648595   | G                | 0.23        | NA      | 2.5e-7     | NA       | Pancreas                        | GTEEx    |
| rs648595   | G                | -0.18       | NA      | 2.8e-7     | NA       | Brain - Hippocampus             | GTEEx    |
| rs648595   | G                | -0.21       | NA      | 0.0000013  | NA       | Brain - Cortex                  | GTEEx    |
| rs648595   | G                | -0.11       | NA      | 0.000010   | NA       | Adipose - Subcutaneous          | GTEEx    |
| rs648595   | G                | -0.24       | NA      | 0.000016   | NA       | Brain - Caudate (basal ganglia) | GTEEx    |
| rs648595   | G                | -0.10       | NA      | 0.000020   | NA       | Thyroid                         | GTEEx    |
| rs648595   | G                | -0.15       | NA      | 0.000035   | NA       | Skin - Sun Exposed              | GTEEx    |
| rs648595   | G                | -0.13       | NA      | 0.00012    | NA       | Lung                            | GTEEx    |
| rs648595   | G                | NA          | -17.80  | 1.1646e-70 | 0        | Blood                           | eQTLGen  |
| rs761142   | C                | NA          | -15.04  | 4.2399e-51 | 0        | Blood                           | eQTLGen  |
| rs761142   | C                | NA          | NA      | 4.240e-51  | NA       | Blood                           | QTLbase  |
| rs761142   | NA               | NA          | NA      | 5.440e-18  | NA       | Brain-Prefrontal Cortex         | QTLbase  |
| rs761142   | NA               | 0.19        | NA      | 2.040e-9   | NA       | Liver                           | QTLbase  |
| rs761142   | C                | -0.35       | NA      | 3.970e-8   | NA       | Adrenal Gland                   | QTLbase  |
| rs761142   | C                | -0.10       | NA      | 5.210e-7   | 0.0038   | Blood                           | QTLbase  |
| rs761142   | NA               | -0.60       | NA      | 5.600e-5   | NA       | Blood-Monocyte                  | QTLbase  |
| rs761142   | NA               | -0.59       | NA      | 6.440e-5   | NA       | Blood-T cell CD8+ naive         | QTLbase  |
| rs761142   | NA               | 0.03        | NA      | 5.010e-4   | 0.0155   | Brain-Prefrontal Cortex         | QTLbase  |
| rs761142   | C                | -0.15       | NA      | 5.620e-4   | NA       | Brain                           | QTLbase  |
| rs761142   | C                | -0.37       | NA      | 9.8e-10    | NA       | Adrenal Gland                   | GTEEx    |
| rs761142   | C                | -0.20       | NA      | 8.8e-7     | NA       | Skin - Not Sun Exposed          | GTEEx    |
| rs761142   | C                | -0.14       | NA      | 0.0000012  | NA       | Testis                          | GTEEx    |
| rs761142   | C                | -0.27       | NA      | 0.0000019  | NA       | Brain - Caudate (basal ganglia) | GTEEx    |
| rs761142   | C                | -0.19       | NA      | 0.0000022  | NA       | Brain - Hippocampus             | GTEEx    |
| rs761142   | C                | -0.23       | NA      | 0.0000043  | NA       | Brain - Cortex                  | GTEEx    |
| rs761142   | C                | -0.23       | NA      | 0.000033   | NA       | Brain - Putamen (basal ganglia) | GTEEx    |
| rs2301022  | C                | -0.20       | NA      | 2.000e-6   | NA       | Lymphocyte                      | QTLbase  |

|           |    |       |      |            |          |                                 |         |
|-----------|----|-------|------|------------|----------|---------------------------------|---------|
| rs2301022 | NA | NA    | NA   | 2.590e-5   | NA       | Brain-Prefrontal Cortex         | QTLbase |
| rs2301022 | T  | NA    | NA   | 1.950e-4   | NA       | Blood                           | QTLbase |
| rs2301022 | NA | -0.39 | NA   | 2.120e-4   | 0.0019   | Blood-Neutrophils CD16+         | QTLbase |
| rs2301022 | G  | NA    | NA   | 4.990e-4   | NA       | Blood                           | QTLbase |
| rs2301022 | T  | NA    | NA   | 8.350e-4   | NA       | Blood                           | QTLbase |
| rs2301022 | C  | 0.20  | NA   | 2.1e-7     | NA       | Esophagus - Mucosa              | GTEEx   |
| rs2301022 | C  | -0.15 | NA   | 5.9e-7     | NA       | Cells - Cultured fibroblasts    | GTEEx   |
| rs2301022 | C  | 0.11  | NA   | 0.00012    | NA       | Skin - Sun Exposed              | GTEEx   |
| rs3827715 | C  | -0.25 | NA   | 1.7e-20    | NA       | Cells - Cultured fibroblasts    | GTEEx   |
| rs3827715 | C  | -0.17 | NA   | 6.2e-11    | NA       | Adipose - Subcutaneous          | GTEEx   |
| rs3827715 | C  | -0.21 | NA   | 1.3e-10    | NA       | Testis                          | GTEEx   |
| rs3827715 | C  | -0.14 | NA   | 1.1e-9     | NA       | Thyroid                         | GTEEx   |
| rs3827715 | C  | -0.19 | NA   | 1.8e-9     | NA       | Nerve - Tibial                  | GTEEx   |
| rs3827715 | C  | -0.15 | NA   | 0.0000016  | NA       | Muscle - Skeletal               | GTEEx   |
| rs3827715 | C  | -0.15 | NA   | 0.0000021  | NA       | Artery - Tibial                 | GTEEx   |
| rs3827715 | C  | -0.12 | NA   | 0.000014   | NA       | Adipose - Visceral              | GTEEx   |
| rs3827715 | C  | 0.16  | NA   | 0.000022   | NA       | Esophagus - Mucosa              | GTEEx   |
| rs3827715 | C  | -0.16 | NA   | 0.000033   | NA       | Heart - Atrial Appendage        | GTEEx   |
| rs3827715 | C  | -0.19 | NA   | 0.000044   | NA       | Pancreas                        | GTEEx   |
| rs3827715 | C  | -0.22 | NA   | 0.000050   | NA       | Brain - Nucleus accumbens       | GTEEx   |
| rs3827715 | C  | -0.16 | NA   | 0.00011    | NA       | Artery - Aorta                  | GTEEx   |
| rs3827715 | C  | -0.12 | NA   | 0.00018    | NA       | Esophagus - Muscularis          | GTEEx   |
| rs3827715 | C  | NA    | 5.37 | 8.0057e-8  | 0.0003   | Blood                           | eQTLGen |
| rs3827715 | G  | NA    | NA   | 4.68E-06   | NA       | Blood                           | QTLbase |
| rs3827715 | NA | 0.26  | NA   | 2E-07      | NA       | Blood                           | QTLbase |
| rs3827715 | C  | NA    | NA   | 2.32E-08   | NA       | Blood                           | QTLbase |
| rs3827715 | NA | 0.52  | NA   | 1.71E-17   | NA       | Blood                           | QTLbase |
| rs3827715 | NA | 0.14  | NA   | 2.04E-08   | 6.09E-06 | Brain-Prefrontal Cortex         | QTLbase |
| rs3827715 | NA | 0.14  | NA   | 5.73E-22   | 3.27E-19 | Brain-Prefrontal Cortex         | QTLbase |
| rs3827715 | NA | -0.19 | NA   | 0.0869     | NA       | Kidney                          | QTLbase |
| rs3827715 | NA | 0.27  | NA   | 5.88E-05   | NA       | Skin                            | QTLbase |
| rs3827715 | NA | 0.48  | NA   | 6.75E-11   | NA       | Skin                            | QTLbase |
| rs3827715 | T  | 0.25  | NA   | 1.67E-08   | NA       | Lymphocyte                      | QTLbase |
| rs3827715 | T  | 0.41  | NA   | 9.42E-17   | NA       | Lymphocyte                      | QTLbase |
| rs7517826 | A  | -0.24 | NA   | 5.5e-20    | NA       | Cells - Cultured fibroblasts    | GTEEx   |
| rs7517826 | A  | -0.17 | NA   | 5.3e-12    | NA       | Adipose - Subcutaneous          | GTEEx   |
| rs7517826 | A  | -0.19 | NA   | 1.7e-10    | NA       | Nerve - Tibial                  | GTEEx   |
| rs7517826 | A  | -0.12 | NA   | 1.7e-8     | NA       | Thyroid                         | GTEEx   |
| rs7517826 | A  | -0.17 | NA   | 3.4e-8     | NA       | Artery - Tibial                 | GTEEx   |
| rs7517826 | A  | -0.16 | NA   | 5.3e-8     | NA       | Muscle - Skeletal               | GTEEx   |
| rs7517826 | A  | -0.13 | NA   | 1.3e-7     | NA       | Adipose - Visceral              | GTEEx   |
| rs7517826 | A  | -0.22 | NA   | 1.3e-7     | NA       | Pancreas                        | GTEEx   |
| rs7517826 | A  | -0.20 | NA   | 1.9e-7     | NA       | Heart - Atrial Appendage        | GTEEx   |
| rs7517826 | A  | -0.26 | NA   | 2.8e-7     | NA       | Brain - Nucleus accumbens       | GTEEx   |
| rs7517826 | A  | -0.15 | NA   | 6.7e-7     | NA       | Esophagus - Muscularis          | GTEEx   |
| rs7517826 | A  | -0.15 | NA   | 6.8e-7     | NA       | Testis                          | GTEEx   |
| rs7517826 | A  | -0.18 | NA   | 0.0000086  | NA       | Artery - Aorta                  | GTEEx   |
| rs7517826 | A  | -0.24 | NA   | 0.000029   | NA       | Brain - Putamen (basal ganglia) | GTEEx   |
| rs7517826 | A  | -0.19 | NA   | 0.000031   | NA       | Pituitary                       | GTEEx   |
| rs7517826 | A  | -0.23 | NA   | 0.00004    | NA       | Brain - Cerebellum              | GTEEx   |
| rs7517826 | A  | 0.14  | NA   | 0.00012    | NA       | Esophagus - Mucosa              | GTEEx   |
| rs7517826 | A  | NA    | 9.18 | 4.2711e-20 | 0        | Blood                           | eQTLGen |
| rs7517826 | C  | 0.49  | NA   | 2.240e-29  | NA       | Lymphocyte                      | QTLbase |
| rs7517826 | NA | NA    | NA   | 1.890e-26  | NA       | Brain-Prefrontal Cortex         | QTLbase |
| rs7517826 | NA | 0.55  | NA   | 5.550e-24  | NA       | Blood                           | QTLbase |

|           |    |       |    |           |           |                           |         |
|-----------|----|-------|----|-----------|-----------|---------------------------|---------|
| rs7517826 | NA | 0.13  | NA | 7.610e-23 | 4.610e-20 | Brain-Prefrontal Cortex   | QTLbase |
| rs7517826 | A  | NA    | NA | 4.270e-20 | NA        | Blood                     | QTLbase |
| rs7517826 | A  | NA    | NA | 2.170e-19 | NA        | Blood                     | QTLbase |
| rs7517826 | NA | 0.54  | NA | 1.090e-13 | NA        | Skin                      | QTLbase |
| rs7517826 | C  | 0.28  | NA | 5.320e-12 | NA        | Lymphocyte                | QTLbase |
| rs7517826 | A  | -0.23 | NA | 2.120e-11 | NA        | Fibroblast                | QTLbase |
| rs7517826 | NA | 0.28  | NA | 4.360e-10 | NA        | Blood                     | QTLbase |
| rs7517826 | NA | 0.14  | NA | 7.940e-10 | 2.990e-7  | Brain-Prefrontal Cortex   | QTLbase |
| rs7517826 | NA | -0.63 | NA | 8.830e-10 | 1.200e-7  | Blood-Neutrophils CD16+   | QTLbase |
| rs7517826 | A  | -0.19 | NA | 2.230e-8  | NA        | Peripheral Nervous System | QTLbase |
| rs7517826 | A  | 0.15  | NA | 4.900e-8  | NA        | Blood                     | QTLbase |
| rs7517826 | A  | -0.26 | NA | 2.180e-7  | NA        | Artery-Aorta              | QTLbase |
| rs7517826 | A  | -0.14 | NA | 2.640e-7  | NA        | Thyroid Gland             | QTLbase |
| rs7517826 | A  | -0.14 | NA | 4.550e-7  | NA        | Adipose-Subcutaneous      | QTLbase |
| rs7517826 | NA | 0.34  | NA | 4.590e-7  | NA        | Skin                      | QTLbase |
| rs7517826 | A  | -0.39 | NA | 6.340e-7  | NA        | Brain-Nucleus Accumbens   | QTLbase |
| rs7517826 | NA | -0.23 | NA | 7.200e-7  | NA        | Blood                     | QTLbase |
| rs7517826 | A  | -0.15 | NA | 1.220e-6  | NA        | Adipose-Visceral          | QTLbase |
| rs7517826 | A  | -0.23 | NA | 2.720e-6  | NA        | Heart-Atrial Appendage    | QTLbase |
| rs7517826 | A  | -0.17 | NA | 4.610e-6  | NA        | Muscle-Skeletal           | QTLbase |
| rs7517826 | A  | -0.18 | NA | 9.760e-6  | NA        | Testis                    | QTLbase |
| rs7517826 | NA | 3.41  | NA | 7.310e-4  | 0.0326    | Blood-Monocyte            | QTLbase |
| rs7517826 | C  | -0.11 | NA | 8.440e-4  | NA        | Lymphocyte                | QTLbase |

NA, not available. eQTL in brain tissues and arteries are highlighted in yellow.
