# Supplementary material for: The Impact of Genetic Polymorphisms in Glutamate-Cysteine Ligase, a Key Enzyme of Glutathione Biosynthesis, on Ischemic Stroke Risk and Brain Infarct Size
Source: MDPI journal article supplement (doi:10.3390/life12040602), 2022-04-18
Supplement: s1 [file s1]

Supplementary table S6

The results of various molecular trait QTL data analysis for SNPs of *GCLC* and *GCLM* genes

| SNP ID     | QTL type | Molecular trait | Effective Allele | Effect size | P-value  | FDR      | Tissue                |
|------------|----------|-----------------|------------------|-------------|----------|----------|-----------------------|
| rs12524494 | sQTL     | GCLC            | NA               | -0.20       | 0.0024   | NA       | Kidney                |
| rs17883901 | mQTL     | cg12013321      | NA               | 0.48        | 4.120e-9 | 0.002    | Blood                 |
| rs17883901 | mQTL     | cg12013321      | NA               | 0.47        | 1.130e-8 | 0.004    | Blood                 |
| rs636933   | mQTL     | cg02868790      | A                | -0.82       | 8.66E-33 | NA       | Prostate              |
| rs636933   | mQTL     | cg02868790      | A                | -0.63       | 2.16E-17 | NA       | Large Intestine-Colon |
| rs636933   | mQTL     | cg02868790      | NA               | NA          | 1.96E-06 | NA       | Fibroblast            |
| rs636933   | sQTL     | GCLC            | NA               | NA          | 3.7E-19  | 6.19E-17 | Brain                 |
| rs636933   | sQTL     | GCLC            | NA               | -0.18       | 1.67E-07 | NA       | Breast                |
| rs636933   | sQTL     | GCLC            | NA               | -0.32       | 2.28E-06 | NA       | Stomach               |
| rs636933   | sQTL     | GCLC            | NA               | -0.21       | 4.16E-06 | NA       | Lung                  |
| rs636933   | sQTL     | GCLC            | NA               | -0.3        | 1.82E-05 | NA       | Esophagus             |
| rs636933   | sQTL     | GCLC            | NA               | -0.25       | 6.44E-05 | NA       | Large Intestine-Colon |
| rs636933   | sQTL     | GCLC            | NA               | -0.22       | 0.000194 | NA       | Ovary                 |
| rs636933   | sQTL     | GCLC            | NA               | -0.17       | 0.000617 | NA       | Thyroid Gland         |
| rs636933   | sQTL     | GCLC            | NA               | -0.14       | 0.000842 | NA       | Kidney                |
| rs648595   | mQTL     | cg02868790      | G                | -0.84       | 6.35E-50 | NA       | Prostate              |
| rs648595   | mQTL     | cg02868790      | G                | -0.46       | 8.92E-13 | NA       | Large Intestine-Colon |
| rs648595   | mQTL     | cg02868790      | G                | -0.3        | 1.63E-09 | NA       | Liver                 |
| rs648595   | sQTL     | GCLC            | NA               | -0.25       | 6.43E-19 | NA       | Breast                |
| rs648595   | sQTL     | GCLC            | NA               | -0.25       | 1.44E-11 | NA       | Lung                  |
| rs648595   | sQTL     | GCLC            | NA               | -0.23       | 7.1E-11  | NA       | Kidney                |
| rs648595   | sQTL     | GCLC            | NA               | -0.2        | 1.11E-09 | NA       | Lung                  |
| rs648595   | sQTL     | GCLC            | NA               | -0.29       | 2.43E-08 | NA       | Stomach               |
| rs648595   | sQTL     | GCLC            | NA               | -0.21       | 3E-08    | NA       | Brain                 |
| rs648595   | sQTL     | GCLC            | NA               | -0.22       | 3.52E-08 | NA       | Thyroid Gland         |
| rs648595   | sQTL     | GCLC            | NA               | -0.36       | 3.85E-07 | NA       | Pancreas              |
| rs648595   | sQTL     | GCLC            | NA               | -0.28       | 2.06E-06 | NA       | Esophagus             |
| rs648595   | sQTL     | GCLC            | NA               | -0.22       | 7.62E-06 | NA       | Ovary                 |
| rs648595   | sQTL     | GCLC            | NA               | -0.28       | 4.39E-05 | NA       | Adrenal Gland         |
| rs761142   | mQTL     | cg02868790      | C                | -0.73       | 6.2E-28  | NA       | Prostate              |
| rs761142   | mQTL     | cg02868790      | C                | -0.46       | 7.89E-11 | NA       | Large Intestine-Colon |
| rs761142   | sQTL     | GCLC            | NA               | -0.19       | 2.08E-09 | NA       | Breast                |
| rs761142   | sQTL     | GCLC            | NA               | -0.32       | 3.08E-07 | NA       | Esophagus             |
| rs761142   | sQTL     | GCLC            | NA               | -0.3        | 4.45E-07 | NA       | Stomach               |
| rs761142   | sQTL     | GCLC            | NA               | -0.2        | 2.24E-06 | NA       | Thyroid Gland         |
| rs761142   | sQTL     | GCLC            | NA               | -0.19       | 3.04E-06 | NA       | Kidney                |
| rs761142   | sQTL     | GCLC            | NA               | -0.17       | 7.56E-05 | NA       | Lung                  |
| rs2301022  | mQTL     | cg16731318      | C                | 0.77        | 6.63E-25 | NA       | Liver                 |
| rs2301022  | mQTL     | cg16731318      | C                | 0.63        | 5.37E-22 | NA       | Thyroid Gland         |
| rs2301022  | mQTL     | cg26688893      | NA               | 0.285673    | 3.73E-13 | 2.75E-07 | Blood                 |
| rs2301022  | mQTL     | cg16731318      | C                | 0.49        | 5.2E-13  | NA       | Brain                 |
| rs2301022  | mQTL     | cg16731318      | C                | 0.47        | 7.28E-11 | NA       | Stomach               |
| rs2301022  | mQTL     | cg26688893      | NA               | 0.238405    | 4.06E-09 | 0.00176  | Blood                 |
| rs2301022  | mQTL     | cg16731318      | C                | 0.53        | 4.76E-09 | NA       | Skin                  |
| rs2301022  | mQTL     | cg16731318      | C                | 0.47        | 1.45E-08 | NA       | Kidney                |
| rs2301022  | mQTL     | cg16731318      | C                | 0.45        | 1.72E-07 | NA       | Cervix                |
| rs2301022  | mQTL     | cg08237401      | NA               | 0.5356      | 2.65E-07 | 3.39E-06 | Blood-Monocytes CD14+ |
| rs2301022  | mQTL     | cg16731318      | C                | 0.64        | 7.91E-07 | NA       | Pancreas              |
| rs2301022  | mQTL     | cg16731318      | C                | 0.61        | 1.31E-06 | NA       | Esophagus             |
| rs2301022  | mQTL     | cg16731318      | C                | 0.65        | 6.6E-06  | NA       | Thymus                |
| rs2301022  | mQTL     | cg22807700      | NA               | -0.4165     | 8.19E-05 | 0.00422  | Blood-Monocytes CD14+ |
| rs2301022  | mQTL     | cg16731318      | NA               | 0.77        | 6.63E-25 | NA       | Liver                 |

|           |      |            |    |       |          |          |                         |
|-----------|------|------------|----|-------|----------|----------|-------------------------|
| rs3827715 | mQTL | cg16731318 | C  | -0.61 | 1.12E-27 | NA       | Breast                  |
| rs3827715 | mQTL | cg16731318 | C  | -0.71 | 3.8E-23  | NA       | Prostate                |
| rs3827715 | mQTL | cg16731318 | C  | -0.58 | 2.05E-16 | NA       | Thyroid Gland           |
| rs3827715 | mQTL | cg16731318 | C  | -0.54 | 1.63E-15 | NA       | Brain                   |
| rs3827715 | mQTL | cg16731318 | C  | -0.64 | 3.03E-15 | NA       | Stomach                 |
| rs3827715 | mQTL | cg16731318 | C  | -0.70 | 8.26E-14 | NA       | Kidney                  |
| rs3827715 | mQTL | cg16731318 | C  | -0.63 | 1.02E-12 | NA       | Kidney                  |
| rs3827715 | mQTL | cg16731318 | C  | -0.55 | 2.17E-12 | NA       | Bladder                 |
| rs3827715 | mQTL | cg13856647 | C  | 0.01  | 5.77E-12 | NA       | Brain                   |
| rs3827715 | mQTL | cg16731318 | C  | -0.59 | 1.03E-11 | NA       | Cervix                  |
| rs3827715 | mQTL | cg16731318 | C  | -0.54 | 1.98E-11 | NA       | Lung                    |
| rs3827715 | mQTL | cg16731318 | C  | -0.65 | 9.35E-11 | NA       | Skin                    |
| rs3827715 | mQTL | cg13856647 | C  | 0.44  | 1.06E-10 | NA       | Prostate                |
| rs3827715 | mQTL | cg15925478 | NA | -0.29 | 1.93E-10 | 0.000101 | Blood                   |
| rs3827715 | mQTL | cg08237401 | NA | 0.31  | 2.47E-10 | 0.000111 | Blood                   |
| rs3827715 | mQTL | cg16731318 | C  | -0.56 | 3.5E-10  | NA       | Liver                   |
| rs3827715 | mQTL | cg22807700 | NA | -0.06 | 6.46E-10 | NA       | Brain-Cerebellum        |
| rs3827715 | mQTL | cg08237401 | NA | 0.32  | 2.38E-09 | 0.00109  | Blood                   |
| rs3827715 | mQTL | cg15925478 | NA | -0.25 | 4.36E-09 | 0.00162  | Blood                   |
| rs3827715 | mQTL | cg16731318 | C  | -0.67 | 1.85E-08 | NA       | Pancreas                |
| rs3827715 | mQTL | cg08237401 | NA | 0.30  | 2.73E-08 | 0.0104   | Blood                   |
| rs3827715 | mQTL | cg22807700 | NA | NA    | 3.71E-08 | NA       | Brain-Cerebellum        |
| rs3827715 | mQTL | cg16731318 | C  | -0.67 | 4.19E-08 | NA       | Esophagus               |
| rs3827715 | mQTL | cg15925478 | NA | -0.22 | 7.78E-08 | 0.0245   | Blood                   |
| rs3827715 | mQTL | cg16731318 | C  | -0.72 | 8.25E-08 | NA       | Uterus                  |
| rs3827715 | mQTL | cg08237401 | NA | 0.26  | 9.86E-08 | 0.0304   | Blood                   |
| rs3827715 | mQTL | cg16731318 | C  | -0.66 | 3.33E-07 | NA       | Blood                   |
| rs3827715 | mQTL | cg15925478 | NA | -0.55 | 1.69E-06 | 1.94E-05 | Blood-Monocytes CD14+   |
| rs3827715 | mQTL | cg22807700 | NA | NA    | 5.25E-06 | 0.006    | Brain-Hippocampus       |
| rs3827715 | mQTL | cg08237401 | NA | 0.51  | 1.03E-05 | 0.000105 | Blood-Monocytes CD14+   |
| rs3827715 | mQTL | cg13856647 | NA | 0.50  | 1.93E-05 | 0.00209  | Blood-Monocytes CD14+   |
| rs3827715 | mQTL | cg08237401 | C  | 0.10  | 2.38E-05 | NA       | Blood                   |
| rs3827715 | mQTL | cg26688893 | C  | 0.05  | 0.000202 | NA       | Blood                   |
| rs3827715 | mQTL | cg22807700 | NA | NA    | 0.000237 | NA       | Brain-Temporal Cortex   |
| rs3827715 | mQTL | cg13856647 | C  | 0.06  | 0.000308 | NA       | Blood                   |
| rs3827715 | mQTL | cg22807700 | NA | NA    | 0.00035  | NA       | Brain-Pons              |
| rs3827715 | mQTL | cg22807700 | NA | -0.40 | 0.000703 | 0.02     | Blood-Monocytes CD14+   |
| rs3827715 | mQTL | cg26829310 | NA | -0.39 | 0.000835 | 0.0461   | Blood-Monocytes CD14+   |
| rs3827715 | mQTL | cg16731318 | C  | -0.61 | 1.12E-27 | NA       | Breast                  |
| rs7517826 | mQTL | cg22807700 | NA | -0.07 | 2.4E-15  | NA       | Brain-Cerebellum        |
| rs7517826 | mQTL | cg22807700 | A  | -0.02 | 5.15E-15 | 3.65E-13 | Brain-Prefrontal Cortex |
| rs7517826 | mQTL | cg22807700 | A  | -0.10 | 5.5E-15  | NA       | Blood                   |
| rs7517826 | mQTL | cg22807700 | NA | NA    | 1.15E-14 | NA       | Brain-Cerebellum        |
| rs7517826 | mQTL | cg26829310 | NA | -0.27 | 1.41E-11 | 7.48E-06 | Blood                   |
| rs7517826 | mQTL | cg26688893 | NA | 0.24  | 7.14E-10 | 0.000316 | Blood                   |
| rs7517826 | mQTL | cg26688893 | A  | 0.06  | 7.3E-10  | NA       | Blood                   |
| rs7517826 | mQTL | cg13856647 | A  | 0.41  | 8.56E-10 | NA       | Bladder                 |
| rs7517826 | mQTL | cg08237401 | NA | 0.29  | 3.49E-09 | 0.00159  | Blood                   |
| rs7517826 | mQTL | cg22807700 | NA | -0.26 | 4.29E-09 | 0.00159  | Blood                   |
| rs7517826 | mQTL | cg26688893 | NA | 0.24  | 8.25E-09 | 0.00404  | Blood                   |
| rs7517826 | mQTL | cg26829310 | NA | -0.27 | 1.12E-08 | 0.00455  | Blood                   |
| rs7517826 | mQTL | cg22807700 | NA | -0.30 | 1.2E-08  | 0.00574  | Blood                   |
| rs7517826 | mQTL | cg26829310 | NA | -0.25 | 1.64E-08 | 0.00694  | Blood                   |
| rs7517826 | mQTL | cg26829310 | A  | -0.09 | 4.97E-08 | NA       | Blood                   |
| rs7517826 | mQTL | cg26829310 | NA | -0.22 | 6.2E-08  | 0.0201   | Blood                   |
| rs7517826 | mQTL | cg26688893 | NA | 0.21  | 9.03E-08 | 0.0335   | Blood                   |
| rs7517826 | mQTL | cg22807700 | NA | NA    | 4E-07    | NA       | Brain-Temporal Cortex   |

|           |      |            |    |       |          |          |                       |
|-----------|------|------------|----|-------|----------|----------|-----------------------|
| rs7517826 | mQTL | cg16731318 | A  | -0.67 | 7.46E-07 | NA       | Thymus                |
| rs7517826 | mQTL | cg22807700 | NA | -0.51 | 8.57E-07 | 0.00022  | Blood-Monocytes CD14+ |
| rs7517826 | mQTL | cg22807700 | NA | NA    | 2.84E-06 | NA       | Brain-Frontal Cortex  |
| rs7517826 | mQTL | cg08237401 | A  | 0.08  | 5.36E-06 | NA       | Blood                 |
| rs7517826 | mQTL | cg22807700 | NA | NA    | 8.15E-05 | NA       | Brain-Pons            |
| rs7517826 | mQTL | cg21201500 | A  | -0.05 | 0.000103 | NA       | Blood                 |
| rs7517826 | mQTL | cg15925478 | NA | -0.41 | 0.000111 | 0.000744 | Blood-Monocytes CD14+ |
| rs7517826 | mQTL | cg08237401 | NA | 0.40  | 0.000127 | 0.000821 | Blood-Monocytes CD14+ |
| rs7517826 | mQTL | cg26829310 | NA | -0.38 | 0.000336 | 0.0431   | Blood-Monocytes CD14+ |
| rs7517826 | mQTL | cg13502903 | A  | -0.06 | 0.000347 | NA       | Blood                 |

mQTL - methylation quantitative trait locus, sQTL - splicing quantitative trait locus.

NA, not available
