# Supplementary material for: The Impact of Genetic Polymorphisms in Glutamate-Cysteine Ligase, a Key Enzyme of Glutathione Biosynthesis, on Ischemic Stroke Risk and Brain Infarct Size
Source: MDPI journal article supplement (doi:10.3390/life12040602), 2022-04-18
Supplement: s1 [file s1]

**A list of transcription factors predicted by atSNP Search whose binding sites are located in the regions around SNPs of *GCLM* and *GCLC* genes**

| Rs ID                         | Alleles | TFBS   | P-value for<br>SNP impact on<br>TF binding | Transcription factor/protein name        | Effect on<br>transcription |
|-------------------------------|---------|--------|--------------------------------------------|------------------------------------------|----------------------------|
| A>G rs12524494 of <i>GCLC</i> |         |        |                                            |                                          |                            |
| rs12524494                    | A       | HOXC12 | 0,00688448                                 | homeobox C12                             | activator                  |
| rs12524494                    | A       | MYEF2  | 0,00754157                                 | myelin expression factor 2               | repressor                  |
| rs12524494                    | A       | FOXD3  | 0,00973114                                 | forkhead box D3                          | repressor                  |
| rs12524494                    | A       | RREB1  | 0,01310995                                 | ras responsive element binding protein 1 | activator                  |
| rs12524494                    | A       | HOXD12 | 0,0131632                                  | homeobox D12                             | unknown                    |
| rs12524494                    | A       | FOXD3  | 0,0154714                                  | forkhead box D3                          | repressor                  |
| rs12524494                    | A       | POU6F1 | 0,01690969                                 | POU class 6 homeobox 1                   | unknown                    |
| rs12524494                    | A       | PROP1  | 0,02243648                                 | PROP paired-like homeobox 1              | activator                  |
| rs12524494                    | A       | HOXC11 | 0,02277948                                 | homeobox C11                             | unknown                    |
| rs12524494                    | A       | HOXD11 | 0,02540463                                 | homeobox D11                             | unknown                    |
| rs12524494                    | A       | HOXC11 | 0,02617546                                 | homeobox C11                             | unknown                    |
| rs12524494                    | A       | HOXC10 | 0,02658399                                 | homeobox C10                             | unknown                    |
| rs12524494                    | A       | AP1    | 0,02963262                                 | adaptor related protein complex 1        | activator                  |
| rs12524494                    | A       | PROP1  | 0,03052568                                 | PROP paired-like homeobox 1              | activator                  |
| rs12524494                    | A       | HOXD11 | 0,03462219                                 | homeobox D11                             | unknown                    |
| rs12524494                    | A       | MEF2C  | 0,03470955                                 | myocyte enhancer factor 2D               | activator                  |
| rs12524494                    | A       | HOXA10 | 0,03523246                                 | homeobox A10                             | unknown                    |
| rs12524494                    | A       | HOXC10 | 0,03816001                                 | homeobox C10                             | unknown                    |
| rs12524494                    | A       | MEF2A  | 0,03998132                                 | myocyte enhancer factor 2D               | activator                  |
| rs12524494                    | A       | Hoxa9  | 0,04083132                                 | homeobox A9                              | unknown                    |
| rs12524494                    | A       | RREB1  | 0,04166861                                 | ras responsive element binding protein 1 | activator                  |
| rs12524494                    | A       | ALX4   | 0,04883897                                 | ALX homeobox 4                           | activator                  |

|                               |   |          |            |                                                                                                 |           |
|-------------------------------|---|----------|------------|-------------------------------------------------------------------------------------------------|-----------|
| rs12524494                    | A | MEF2D    | 0,04945944 | myocyte enhancer factor 2D                                                                      | activator |
| rs12524494                    | A | ARX      | 0,04988756 | aristaless related homeobox                                                                     | unknown   |
| rs12524494                    | G | SRY      | 0,00009106 | sex determining region Y                                                                        | activator |
| rs12524494                    | G | HSFY2    | 0,00122658 | heat shock transcription factor Y-linked 2                                                      | activator |
| rs12524494                    | G | SPDEF    | 0,00207513 | SAM pointed domain containing ETS transcription factor                                          | activator |
| rs12524494                    | G | PRDM1    | 0,00930715 | PR/SET domain 1                                                                                 | repressor |
| rs12524494                    | G | NFAT     | 0,00979334 | Nuclear factor of activated T-cells                                                             | activator |
| rs12524494                    | G | IRF1     | 0,00981276 | interferon regulatory factor 1                                                                  | activator |
| rs12524494                    | G | HSFY2    | 0,0117527  | heat shock transcription factor Y-linked 2                                                      | activator |
| rs12524494                    | G | IRF      | 0,0118172  | tripartite motif containing 63                                                                  | unknown   |
| rs12524494                    | G | PRDM1    | 0,01586607 | PR/SET domain 1                                                                                 | repressor |
| rs12524494                    | G | IRF8     | 0,02036629 | interferon regulatory factor 8                                                                  | dual      |
| rs12524494                    | G | MEF2A    | 0,02089385 | myocyte enhancer factor 2A                                                                      | activator |
| rs12524494                    | G | Spi1     | 0,0254237  | Spi-1 proto-oncogene                                                                            | activator |
| rs12524494                    | G | STAT5A   | 0,02677579 | signal transducer and activator of transcription 5A                                             | activator |
| rs12524494                    | G | FOXA     | 0,03034514 | Forkhead box protein A                                                                          | activator |
| rs12524494                    | G | AR       | 0,03196412 | androgen receptor                                                                               | dual      |
| rs12524494                    | G | MYC      | 0,03319387 | MYC proto-oncogene, bHLH transcription factor                                                   | dual      |
| rs12524494                    | G | SRF      | 0,03389341 | serum response factor                                                                           | activator |
| rs12524494                    | G | SPIC     | 0,03634069 | Spi-C transcription factor                                                                      | activator |
| rs12524494                    | G | REST     | 0,03803775 | RE1 silencing transcription factor                                                              | dual      |
| rs12524494                    | G | ARHGEF12 | 0,04307261 | Rho guanine nucleotide exchange factor 12                                                       | activator |
| rs12524494                    | G | GATA     | 0,04564428 | glutaminyl-tRNA amidotransferase subunit QRSL1                                                  | unknown   |
| rs12524494                    | G | AR       | 0,0475197  | androgen receptor                                                                               | dual      |
| G>A rs17883901 of <i>GCLC</i> |   |          |            |                                                                                                 |           |
| rs17883901                    | G | REST     | 0,00460551 | RE1 silencing transcription factor                                                              | dual      |
| rs17883901                    | G | SIX5     | 0,00885429 | SIX homeobox 5                                                                                  | activator |
| rs17883901                    | G | CTCF     | 0,01011891 | CCCTC-binding factor                                                                            | repressor |
| rs17883901                    | G | MYC      | 0,01122463 | MYC proto-oncogene, bHLH transcription factor                                                   | dual      |
| rs17883901                    | G | SMARCC1  | 0,01759352 | SWI/SNF related, matrix associated, actin dependent regulator of chromatin subfamily c member 1 | activator |

|            |   |             |            |                                                                            |           |
|------------|---|-------------|------------|----------------------------------------------------------------------------|-----------|
| rs17883901 | G | CENPB       | 0,01925176 | centromere protein B                                                       | repressor |
| rs17883901 | G | PAX5        | 0,02215997 | paired box 5                                                               | activator |
| rs17883901 | G | ZIC1        | 0,02436389 | Zic family member 1                                                        | repressor |
| rs17883901 | G | RAD21       | 0,03175998 | RAD21 cohesin complex component                                            | activator |
| rs17883901 | G | EGR4        | 0,03403306 | early growth response 4                                                    | unknown   |
| rs17883901 | G | RAD21       | 0,03594907 | RAD21 cohesin complex component                                            | activator |
| rs17883901 | G | NR1H        | 0,04649142 | nuclear receptor subfamily 1 group H                                       | activator |
| rs17883901 | A | PPARA       | 0,00000001 | peroxisome proliferator activated receptor alpha                           | dual      |
| rs17883901 | A | CEBPB       | 0,00000031 | CCAAT enhancer binding protein beta                                        | dual      |
| rs17883901 | A | ESR1        | 0,0000009  | estrogen receptor 1                                                        | activator |
| rs17883901 | A | API         | 0,00000122 | adaptor related protein complex 1                                          | activator |
| rs17883901 | A | NFE2L1      | 0,00000453 | nuclear factor, erythroid 2 like 1                                         | activator |
| rs17883901 | A | RARA        | 0,0004223  | retinoic acid receptor alpha                                               | dual      |
| rs17883901 | A | HNF4        | 0,00133245 | hepatocyte nuclear factor 4 alpha                                          | activator |
| rs17883901 | A | RXRG        | 0,00188399 | retinoid X receptor gamma                                                  | unknown   |
| rs17883901 | A | RORA        | 0,00352615 | RAR related orphan receptor A                                              | activator |
| rs17883901 | A | PPARG::RXRA | 0,00438426 | peroxisome proliferator activated receptor gamma_retinoid X receptor alpha | activator |
| rs17883901 | A | PPARG       | 0,00447461 | peroxisome proliferator activated receptor gamma                           | activator |
| rs17883901 | A | HNF4A       | 0,00470891 | hepatocyte nuclear factor 4 alpha                                          | activator |
| rs17883901 | A | CEBPG       | 0,00485005 | CCAAT enhancer binding protein gamma                                       | activator |
| rs17883901 | A | JUND        | 0,00597178 | JunB proto-oncogene, AP-1 transcription factor subunit                     | activator |
| rs17883901 | A | CEBPG       | 0,00668313 | CCAAT enhancer binding protein gamma                                       | activator |
| rs17883901 | A | VDR         | 0,00674023 | vitamin D receptor                                                         | activator |
| rs17883901 | A | JUN         | 0,00743989 | Jun proto-oncogene, AP-1 transcription factor subunit                      | activator |
| rs17883901 | A | HLF         | 0,00745564 | HLF transcription factor, PAR bZIP family member                           | activator |
| rs17883901 | A | CREB1       | 0,00748847 | cAMP responsive element binding protein 1                                  | dual      |
| rs17883901 | A | CEBPB       | 0,00755512 | CCAAT enhancer binding protein beta                                        | dual      |
| rs17883901 | A | CEBPE       | 0,00768707 | CCAAT enhancer binding protein epsilon                                     | activator |
| rs17883901 | A | API         | 0,00787946 | adaptor related protein complex 1                                          | activator |
| rs17883901 | A | CEBPD       | 0,00797456 | CCAAT enhancer binding protein delta                                       | activator |

|            |   |             |            |                                                                         |           |
|------------|---|-------------|------------|-------------------------------------------------------------------------|-----------|
| rs17883901 | A | FOSL2       | 0,00797862 | FOS like 2, AP-1 transcription factor subunit                           | unknown   |
| rs17883901 | A | HNF4A       | 0,00835495 | hepatocyte nuclear factor 4 alpha                                       | activator |
| rs17883901 | A | CREB1       | 0,00955513 | cAMP responsive element binding protein 1                               | dual      |
| rs17883901 | A | DBP         | 0,00993451 | D-box binding PAR bZIP transcription factor                             | unknown   |
| rs17883901 | A | CEBPB       | 0,01011265 | CCAAT enhancer binding protein beta                                     | dual      |
| rs17883901 | A | HLF         | 0,01033    | HLF transcription factor, PAR bZIP family member                        | activator |
| rs17883901 | A | RXRA        | 0,01071759 | retinoid X receptor alpha                                               | activator |
| rs17883901 | A | CREB1       | 0,01071957 | cAMP responsive element binding protein 1                               | dual      |
| rs17883901 | A | HNF4A       | 0,01138496 | hepatocyte nuclear factor 4 alpha                                       | activator |
| rs17883901 | A | ATF7        | 0,01159616 | activating transcription factor 7                                       | activator |
| rs17883901 | A | NANOG       | 0,01198007 | Nanog homeobox                                                          | dual      |
| rs17883901 | A | CEBPA       | 0,01212469 | CCAAT enhancer binding protein alpha                                    | activator |
| rs17883901 | A | ALX4        | 0,01213862 | ALX homeobox 4                                                          | activator |
| rs17883901 | A | NFIL3       | 0,01217346 | nuclear factor, interleukin 3 regulated                                 | repressor |
| rs17883901 | A | HNF4A       | 0,0125721  | hepatocyte nuclear factor 4 alpha                                       | activator |
| rs17883901 | A | NR4A2       | 0,01318777 | nuclear receptor subfamily 4 group A member 2                           | activator |
| rs17883901 | A | RXRA        | 0,01322997 | retinoid X receptor alpha                                               | activator |
| rs17883901 | A | CREB1       | 0,0147806  | cAMP responsive element binding protein 1                               | dual      |
| rs17883901 | A | CREB1       | 0,01562041 | cAMP responsive element binding protein 1                               | dual      |
| rs17883901 | A | NR2E1       | 0,01567254 | nuclear receptor subfamily 2 group E member 1                           | dual      |
| rs17883901 | A | HNF4A       | 0,01601905 | hepatocyte nuclear factor 4 alpha                                       | activator |
| rs17883901 | A | GATA        | 0,01622611 | glutaminyt-tRNA amidotransferase subunit QRSL1                          | unknown   |
| rs17883901 | A | JUN::FOS    | 0,0165114  | Jun proto-oncogene, AP-1 transcription factor subunit                   | activator |
| rs17883901 | A | CREB1       | 0,01658897 | cAMP responsive element binding protein 1                               | dual      |
| rs17883901 | A | NR1H2::RXRA | 0,01807333 | nuclear receptor subfamily 1 group H member 2:retinoid X receptor alpha | activator |
| rs17883901 | A | TRIM28      | 0,01824363 | tripartite motif containing 28                                          | activator |
| rs17883901 | A | JDP2        | 0,0190496  | Jun dimerization protein 2                                              | repressor |
| rs17883901 | A | RORA        | 0,0191615  | RAR related orphan receptor A                                           | activator |
| rs17883901 | A | HSF         | 0,02007655 | interleukin 6                                                           | activator |
| rs17883901 | A | USF         | 0,02165686 | Upstream stimulatory factors                                            | activator |

|            |   |              |            |                                                                            |           |
|------------|---|--------------|------------|----------------------------------------------------------------------------|-----------|
| rs17883901 | A | PAX6         | 0,02172257 | paired box 6                                                               | activator |
| rs17883901 | A | TBX21        | 0,02315743 | T-box transcription factor 21                                              | repressor |
| rs17883901 | A | PAX5         | 0,02409916 | paired box 5                                                               | activator |
| rs17883901 | A | JDP2         | 0,02453651 | Jun dimerization protein 2                                                 | repressor |
| rs17883901 | A | NFE2L1::MAFG | 0,02499941 | nuclear factor, erythroid 2 like 1:MAF bZIP transcription factor G         | activator |
| rs17883901 | A | FOXJ3        | 0,02539159 | forkhead box J3                                                            | activator |
| rs17883901 | A | MYC          | 0,02599091 | MYC proto-oncogene, bHLH transcription factor                              | dual      |
| rs17883901 | A | ARX          | 0,02700054 | aristaless related homeobox                                                | unknown   |
| rs17883901 | A | CEBPB        | 0,02702804 | CCAAT enhancer binding protein beta                                        | dual      |
| rs17883901 | A | BATF         | 0,02756623 | basic leucine zipper ATF-like transcription factor                         | activator |
| rs17883901 | A | HMGN3        | 0,02826825 | high mobility group nucleosomal binding domain 3                           | unknown   |
| rs17883901 | A | ATF1         | 0,02899337 | activating transcription factor 1 / glial cell derived neurotrophic factor | activator |
| rs17883901 | A | NR4A2        | 0,03043427 | nuclear receptor subfamily 4 group A member 2                              | activator |
| rs17883901 | A | PAX6         | 0,03096494 | paired box 6                                                               | activator |
| rs17883901 | A | PRDM1        | 0,03174036 | PR/SET domain 1                                                            | repressor |
| rs17883901 | A | CEBP         | 0,03206944 | CCAAT enhancer binding protein alpha                                       | activator |
| rs17883901 | A | Pax6         | 0,03213223 | paired box 6                                                               | activator |
| rs17883901 | A | EP300        | 0,03236763 | E1A binding protein p300                                                   | activator |
| rs17883901 | A | SOX17        | 0,03313213 | SRY-box transcription factor 17                                            | activator |
| rs17883901 | A | JUNB         | 0,03423789 | JunB proto-oncogene, AP-1 transcription factor subunit                     | activator |
| rs17883901 | A | JDP2         | 0,03428448 | Jun dimerization protein 2                                                 | repressor |
| rs17883901 | A | NR1H4        | 0,03589925 | nuclear receptor subfamily 1 group H member 4                              | repressor |
| rs17883901 | A | ZNF282       | 0,03594888 | zinc finger protein 282                                                    | repressor |
| rs17883901 | A | SREBF1       | 0,03654425 | sterol regulatory element binding transcription factor 1                   | activator |
| rs17883901 | A | TEF          | 0,03717118 | TEF transcription factor, PAR bZIP family member                           | activator |
| rs17883901 | A | TCF7L2       | 0,04198696 | transcription factor 7 like 2                                              | dual      |
| rs17883901 | A | FOSL1        | 0,04299858 | FOS like 1, AP-1 transcription factor subunit                              | unknown   |
| rs17883901 | A | BATF::JUN    | 0,04409598 | basic leucine zipper ATF-like transcription factor                         | activator |
| rs17883901 | A | NR2F1        | 0,04463238 | nuclear receptor subfamily 2 group F member 1                              | dual      |
| rs17883901 | A | NFE2L1::MafG | 0,04604332 | nuclear factor, erythroid 2 like 1                                         | activator |

|                             |   |         |            |                                                                            |           |
|-----------------------------|---|---------|------------|----------------------------------------------------------------------------|-----------|
| rs17883901                  | A | SREBF2  | 0,04733187 | sterol regulatory element binding transcription factor 2                   | activator |
| rs17883901                  | A | ATF1    | 0,04748018 | activating transcription factor 1 / glial cell derived neurotrophic factor | activator |
| rs17883901                  | A | ESR2    | 0,04834271 | estrogen receptor 2                                                        | activator |
| rs17883901                  | A | JDP2    | 0,04934466 | Jun dimerization protein 2                                                 | repressor |
| rs17883901                  | A | FOS     | 0,04988163 | Fos proto-oncogene, AP-1 transcription factor subunit                      | unknown   |
| C>T rs606548 of <i>GCLC</i> |   |         |            |                                                                            |           |
| rs606548                    | C | WT1     | 0,00000038 | WT1 transcription factor                                                   | unknown   |
| rs606548                    | C | YY1     | 0,00000115 | YY1 transcription factor                                                   | dual      |
| rs606548                    | C | ATF3    | 0,00002455 | activating transcription factor 3                                          | dual      |
| rs606548                    | C | MYC     | 0,00003182 | MYC proto-oncogene, bHLH transcription factor                              | dual      |
| rs606548                    | C | TCF3    | 0,00015253 | transcription factor 3 / transcription factor 7 like 1                     | dual      |
| rs606548                    | C | TCF3    | 0,00083532 | transcription factor 3 / transcription factor 7 like 1                     | dual      |
| rs606548                    | C | TCF4    | 0,00108915 | transcription factor 4 / transcription factor 7 like 2                     | activator |
| rs606548                    | C | MESP1   | 0,00168894 | mesoderm posterior bHLH transcription factor 1                             | activator |
| rs606548                    | C | BHLHE41 | 0,00196477 | basic helix-loop-helix family member e41                                   | repressor |
| rs606548                    | C | BHLHE40 | 0,00237336 | basic helix-loop-helix family member e40                                   | dual      |
| rs606548                    | C | TFCP2   | 0,00262335 | transcription factor CP2                                                   | activator |
| rs606548                    | C | USF2    | 0,00323042 | upstream transcription factor 2, c-fos interacting                         | activator |
| rs606548                    | C | REST    | 0,00323336 | RE1 silencing transcription factor                                         | dual      |
| rs606548                    | C | ASCL2   | 0,00337564 | achaete-scute family bHLH transcription factor 2                           | unknown   |
| rs606548                    | C | BHLHE40 | 0,00348578 | basic helix-loop-helix family member e40                                   | dual      |
| rs606548                    | C | MYCN    | 0,00368425 | MYCN proto-oncogene, bHLH transcription factor                             | activator |
| rs606548                    | C | Mycn    | 0,00392639 | MYCN proto-oncogene, bHLH transcription factor                             | activator |
| rs606548                    | C | TCF3    | 0,00399713 | transcription factor 3 / transcription factor 7 like 1                     | dual      |
| rs606548                    | C | MNT     | 0,00405737 | MAX network transcriptional repressor                                      | dual      |
| rs606548                    | C | MYC     | 0,00421842 | MYC proto-oncogene, bHLH transcription factor                              | dual      |
| rs606548                    | C | TFAP2   | 0,00472683 | transcription factor AP-2 alpha                                            | activator |
| rs606548                    | C | API1    | 0,00479182 | adaptor related protein complex 1                                          | activator |
| rs606548                    | C | EGR3    | 0,00484729 | early growth response 3                                                    | unknown   |
| rs606548                    | C | MYOD1   | 0,00485676 | myogenic differentiation 1                                                 | activator |

|          |   |          |            |                                                                         |           |
|----------|---|----------|------------|-------------------------------------------------------------------------|-----------|
| rs606548 | C | USF      | 0,00503902 | Upstream stimulatory factors                                            | activator |
| rs606548 | C | REST     | 0,00558022 | RE1 silencing transcription factor                                      | dual      |
| rs606548 | C | EGR1     | 0,00558286 | early growth response 1                                                 | activator |
| rs606548 | C | ARNTL    | 0,00571248 | aryl hydrocarbon receptor nuclear translocator like                     | repressor |
| rs606548 | C | SIN3A    | 0,00576975 | SIN3 transcription regulator family member A                            | dual      |
| rs606548 | C | Myog     | 0,00579294 | myogenin                                                                | activator |
| rs606548 | C | Tcf12    | 0,00594296 | transcription factor 12                                                 | activator |
| rs606548 | C | EBOX     | 0,00598713 | enhancer box                                                            | activator |
| rs606548 | C | MXI1     | 0,00609672 | MAX interactor 1, dimerization protein                                  | repressor |
| rs606548 | C | TFCP2    | 0,00633846 | transcription factor CP2                                                | activator |
| rs606548 | C | BHLHE41  | 0,00660087 | basic helix-loop-helix family member e41                                | repressor |
| rs606548 | C | MYC      | 0,00665261 | MYC proto-oncogene, bHLH transcription factor                           | dual      |
| rs606548 | C | ZEB1     | 0,00666924 | zinc finger E-box binding homeobox 1                                    | dual      |
| rs606548 | C | MYC::MAX | 0,00667017 | MYC proto-oncogene, bHLH transcription factor _ MYC associated factor X | dual      |
| rs606548 | C | Myod1    | 0,00669435 | myogenic differentiation 1                                              | activator |
| rs606548 | C | EGR4     | 0,0067055  | early growth response 4                                                 | unknown   |
| rs606548 | C | MYC      | 0,00711481 | MYC proto-oncogene, bHLH transcription factor                           | dual      |
| rs606548 | C | ARNT     | 0,00724873 | aryl hydrocarbon receptor nuclear translocator                          | activator |
| rs606548 | C | MLXIPL   | 0,00759103 | MLX interacting protein like                                            | repressor |
| rs606548 | C | MAX      | 0,00823346 | MYC associated factor X                                                 | dual      |
| rs606548 | C | E2F1     | 0,00840379 | E2F transcription factor 1                                              | repressor |
| rs606548 | C | TBX5     | 0,00863614 | T-box transcription factor 5                                            | activator |
| rs606548 | C | TAL1     | 0,00882408 | TAL bHLH transcription factor 1, erythroid differentiation factor       | activator |
| rs606548 | C | HES5     | 0,00907627 | hes family bHLH transcription factor 5                                  | repressor |
| rs606548 | C | Arnt     | 0,00908941 | aryl hydrocarbon receptor nuclear translocator                          | activator |
| rs606548 | C | ARNT     | 0,00928532 | aryl hydrocarbon receptor nuclear translocator                          | activator |
| rs606548 | C | EGR1     | 0,00935062 | early growth response 1                                                 | activator |
| rs606548 | C | NR2C2    | 0,00960724 | nuclear receptor subfamily 2 group C member 2                           | activator |
| rs606548 | C | NRF1     | 0,00969985 | nuclear respiratory factor 1_nuclear factor, erythroid 2 like 1         | activator |
| rs606548 | C | MYC      | 0,0104547  | MYC proto-oncogene, bHLH transcription factor                           | dual      |

|          |   |         |            |                                                                   |           |
|----------|---|---------|------------|-------------------------------------------------------------------|-----------|
| rs606548 | C | MYF6    | 0,01058168 | myogenic factor 6                                                 | activator |
| rs606548 | C | MLX     | 0,01145177 | MAX dimerization protein MLX                                      | repressor |
| rs606548 | C | MAX     | 0,01181282 | MYC associated factor X                                           | dual      |
| rs606548 | C | EGR1    | 0,01192492 | early growth response 1                                           | activator |
| rs606548 | C | HINFP   | 0,01199455 | histone H4 transcription factor                                   | activator |
| rs606548 | C | E2F1    | 0,01199655 | E2F transcription factor 1                                        | repressor |
| rs606548 | C | BHLHE40 | 0,01216586 | basic helix-loop-helix family member e40                          | dual      |
| rs606548 | C | TFE3    | 0,01254485 | transcription factor binding to IGHM enhancer 3                   | activator |
| rs606548 | C | RREB1   | 0,01293411 | ras responsive element binding protein 1                          | activator |
| rs606548 | C | ARNT    | 0,01298143 | aryl hydrocarbon receptor nuclear translocator                    | activator |
| rs606548 | C | TCF3    | 0,01331265 | transcription factor 3 / transcription factor 7 like 1            | dual      |
| rs606548 | C | E2F     | 0,01335948 | E2F transcription factors                                         | activator |
| rs606548 | C | POU2F2  | 0,01392187 | POU class 2 homeobox 2                                            | activator |
| rs606548 | C | TAL1    | 0,01446152 | TAL bHLH transcription factor 1, erythroid differentiation factor | activator |
| rs606548 | C | MYF     | 0,01471224 | Myogenic regulatory family                                        | activator |
| rs606548 | C | Myc     | 0,01515093 | MYC proto-oncogene, bHLH transcription factor                     | dual      |
| rs606548 | C | MAX     | 0,01614799 | MYC associated factor X                                           | dual      |
| rs606548 | C | YY1     | 0,01697466 | YY1 transcription factor                                          | dual      |
| rs606548 | C | EGR2    | 0,01728248 | early growth response 2                                           | activator |
| rs606548 | C | NRF1    | 0,01770854 | nuclear respiratory factor 1_nuclear factor, erythroid 2 like 1   | activator |
| rs606548 | C | TBX4    | 0,01780036 | T-box transcription factor 4                                      | activator |
| rs606548 | C | MEIS3   | 0,01785668 | Meis homeobox 3 pseudogene 1                                      | activator |
| rs606548 | C | NHLH1   | 0,01833971 | nescient helix-loop-helix 1                                       | activator |
| rs606548 | C | NHLH1   | 0,01840164 | nescient helix-loop-helix 1                                       | activator |
| rs606548 | C | TBX5    | 0,01858407 | T-box transcription factor 5                                      | activator |
| rs606548 | C | GLIS3   | 0,0189369  | GLIS family zinc finger 3                                         | dual      |
| rs606548 | C | TFE3    | 0,01926256 | transcription factor binding to IGHM enhancer 3                   | activator |
| rs606548 | C | GATA    | 0,01936247 | glutaminyt-tRNA amidotransferase subunit QRSL1                    | unknown   |
| rs606548 | C | E2F1    | 0,01953315 | E2F transcription factor 1                                        | repressor |
| rs606548 | C | MAX     | 0,02008856 | MYC associated factor X                                           | dual      |



|          |   |              |            |                                                                               |           |
|----------|---|--------------|------------|-------------------------------------------------------------------------------|-----------|
| rs606548 | C | USF1         | 0,02023199 | upstream transcription factor 1                                               | activator |
| rs606548 | C | SIN3A        | 0,02094519 | SIN3 transcription regulator family member A                                  | dual      |
| rs606548 | C | TGIF2        | 0,02108174 | TGFB induced factor homeobox 2                                                | repressor |
| rs606548 | C | MYOD1        | 0,02135359 | myogenic differentiation 1                                                    | activator |
| rs606548 | C | NR1H4        | 0,0213629  | nuclear receptor subfamily 1 group H member 4                                 | repressor |
| rs606548 | C | RREB1        | 0,02168069 | ras responsive element binding protein 1                                      | activator |
| rs606548 | C | SETDB1       | 0,02187887 | SET domain bifurcated histone lysine methyltransferase 1                      | repressor |
| rs606548 | C | USF          | 0,02286497 | Upstream stimulatory factors                                                  | activator |
| rs606548 | C | PTEN         | 0,02290576 | phosphatase and tensin homolog                                                | unknown   |
| rs606548 | C | MSC          | 0,02298758 | musculin                                                                      | unknown   |
| rs606548 | C | TCF3         | 0,02317515 | transcription factor 3 / transcription factor 7 like 1                        | dual      |
| rs606548 | C | TCF12        | 0,02334591 | transcription factor 12                                                       | activator |
| rs606548 | C | SMC3         | 0,02334965 | structural maintenance of chromosomes 3                                       | activator |
| rs606548 | C | EGR3         | 0,02373409 | early growth response 3                                                       | unknown   |
| rs606548 | C | MYC::MAX     | 0,0237419  | MYC proto-oncogene, bHLH transcription factor _ MYC associated factor X       | dual      |
| rs606548 | C | TFAP4        | 0,02406278 | transcription factor AP-4                                                     | activator |
| rs606548 | C | BHLHE40      | 0,02447855 | basic helix-loop-helix family member e40                                      | dual      |
| rs606548 | C | TFEB         | 0,02522784 | transcription factor EB                                                       | activator |
| rs606548 | C | MYC::MAX     | 0,0254963  | MYC proto-oncogene, bHLH transcription factor _ MYC associated factor X       | dual      |
| rs606548 | C | SPI1         | 0,02558332 | Spi-1 proto-oncogene                                                          | activator |
| rs606548 | C | RAD21        | 0,02579872 | RAD21 cohesin complex component                                               | activator |
| rs606548 | C | TFAP2A       | 0,02593552 | transcription factor AP-2 alpha                                               | dual      |
| rs606548 | C | GLIS2        | 0,02638018 | GLIS family zinc finger 2                                                     | dual      |
| rs606548 | C | E2F1         | 0,02786001 | E2F transcription factor 1                                                    | repressor |
| rs606548 | C | Atoh1        | 0,02806959 | atonal bHLH transcription factor 1                                            | dual      |
| rs606548 | C | ZBTB18       | 0,02815547 | zinc finger and BTB domain containing 18                                      | activator |
| rs606548 | C | E2F1         | 0,02819874 | E2F transcription factor 1                                                    | repressor |
| rs606548 | C | CLOCK::ARNTL | 0,02830329 | clock circadian regulator:aryl hydrocarbon receptor nuclear translocator like | dual      |
| rs606548 | C | TFAP2C       | 0,02855949 | transcription factor AP-2 gamma                                               | activator |
| rs606548 | C | EGR1         | 0,02857161 | early growth response 1                                                       | activator |

|          |   |          |            |                                                                         |           |
|----------|---|----------|------------|-------------------------------------------------------------------------|-----------|
| rs606548 | C | NFE2     | 0,02869241 | nuclear factor, erythroid 2                                             | activator |
| rs606548 | C | PKNOX2   | 0,02874821 | PBX/knotted 1 homeobox 2                                                | dual      |
| rs606548 | C | SIN3A    | 0,02988588 | SIN3 transcription regulator family member A                            | dual      |
| rs606548 | C | TAL1     | 0,0299515  | TAL bHLH transcription factor 1, erythroid differentiation factor       | activator |
| rs606548 | C | TGIF1    | 0,0312851  | TGFB induced factor homeobox 1                                          | repressor |
| rs606548 | C | TFAP4    | 0,0328394  | transcription factor AP-4                                               | activator |
| rs606548 | C | E2F1     | 0,03671325 | E2F transcription factor 1                                              | repressor |
| rs606548 | C | MYC::MAX | 0,03705931 | MYC proto-oncogene, bHLH transcription factor _ MYC associated factor X | dual      |
| rs606548 | C | ESRRA    | 0,03771439 | estrogen related receptor alpha                                         | activator |
| rs606548 | C | CTCF     | 0,03783071 | CCCTC-binding factor                                                    | repressor |
| rs606548 | C | TBX15    | 0,03793956 | T-box transcription factor 15                                           | repressor |
| rs606548 | C | EGR1     | 0,04012118 | early growth response 1                                                 | activator |
| rs606548 | C | VDR      | 0,04065613 | vitamin D receptor                                                      | activator |
| rs606548 | C | TFAP2    | 0,0412301  | transcription factor AP-2 alpha                                         | activator |
| rs606548 | C | MYF6     | 0,04190285 | myogenic factor 6                                                       | activator |
| rs606548 | C | ESRRA    | 0,04217532 | estrogen related receptor alpha                                         | activator |
| rs606548 | C | TFAP4    | 0,04327519 | transcription factor AP-4                                               | activator |
| rs606548 | C | SREBF1   | 0,04345022 | sterol regulatory element binding transcription factor 1                | activator |
| rs606548 | C | ZBTB7B   | 0,04459099 | zinc finger and BTB domain containing 7B                                | repressor |
| rs606548 | C | ZBTB18   | 0,04524501 | zinc finger and BTB domain containing 18                                | activator |
| rs606548 | C | MAX      | 0,04711606 | MYC associated factor X                                                 | dual      |
| rs606548 | C | MYOD1    | 0,04723757 | myogenic differentiation 1                                              | activator |
| rs606548 | C | TCF12    | 0,04744339 | transcription factor 12                                                 | activator |
| rs606548 | C | MEIS3    | 0,04828668 | Meis homeobox 3 pseudogene 1                                            | activator |
| rs606548 | C | TBX2     | 0,04971994 | T-box transcription factor 2                                            | repressor |
| rs606548 | T | CTCF     | 0,00655383 | CCCTC-binding factor                                                    | repressor |
| rs606548 | T | RAD21    | 0,00759339 | RAD21 cohesin complex component                                         | activator |
| rs606548 | T | ZBTB33   | 0,02007987 | zinc finger and BTB domain containing 33                                | activator |
| rs606548 | T | ZBTB7A   | 0,02410717 | zinc finger and BTB domain containing 7A                                | repressor |
| rs606548 | T | FOXC1    | 0,02563964 | forkhead box C1                                                         | activator |

|                             |   |        |            |                                                                |           |
|-----------------------------|---|--------|------------|----------------------------------------------------------------|-----------|
| rs606548                    | T | PAX1   | 0,0357732  | paired box 1                                                   | activator |
| rs606548                    | T | PPARG  | 0,04137177 | peroxisome proliferator activated receptor gamma               | activator |
| rs606548                    | T | NR2C2  | 0,04343217 | nuclear receptor subfamily 2 group C member 2                  | activator |
| rs606548                    | T | STAT5A | 0,04515471 | signal transducer and activator of transcription 5A            | activator |
| rs606548                    | T | HMBOX1 | 0,04902403 | homeobox containing 1                                          | unknown   |
| G>A rs636933 of <i>GCLC</i> |   |        |            |                                                                |           |
| rs636933                    | G | ESRRA  | 0          | estrogen related receptor alpha                                | activator |
| rs636933                    | G | REST   | 0,00000001 | RE1 silencing transcription factor                             | dual      |
| rs636933                    | G | EP300  | 0,00012083 | E1A binding protein p300                                       | activator |
| rs636933                    | G | RAD21  | 0,00065368 | RAD21 cohesin complex component                                | activator |
| rs636933                    | G | EGR1   | 0,00224434 | early growth response 1                                        | activator |
| rs636933                    | G | VDR    | 0,00315262 | vitamin D receptor                                             | activator |
| rs636933                    | G | SIN3A  | 0,00844079 | SIN3 transcription regulator family member A                   | dual      |
| rs636933                    | G | GLI2   | 0,00866745 | GLI family zinc finger 2                                       | dual      |
| rs636933                    | G | RARG   | 0,00954046 | retinoic acid receptor gamma                                   | activator |
| rs636933                    | G | SMAD   | 0,01291437 | SMAD family                                                    | activator |
| rs636933                    | G | RARA   | 0,01488799 | retinoic acid receptor alpha                                   | dual      |
| rs636933                    | G | NFKB   | 0,01612059 | nuclear factor kappa-light-chain-enhancer of activated B cells | activator |
| rs636933                    | G | SOX15  | 0,01677425 | SRY-box transcription factor 15                                | repressor |
| rs636933                    | G | PROX1  | 0,01885267 | prospero homeobox 1                                            | repressor |
| rs636933                    | G | ZIC2   | 0,02170427 | Zic family member 2                                            | activator |
| rs636933                    | G | RARG   | 0,02283718 | retinoic acid receptor gamma                                   | activator |
| rs636933                    | G | GLIS1  | 0,02399974 | GLIS family zinc finger 1                                      | dual      |
| rs636933                    | G | NR2C2  | 0,0250681  | nuclear receptor subfamily 2 group C member 2                  | activator |
| rs636933                    | G | RARG   | 0,0251907  | retinoic acid receptor gamma                                   | activator |
| rs636933                    | G | ZNF219 | 0,02747611 | zinc finger protein 219                                        | dual      |
| rs636933                    | G | VDR    | 0,02832608 | vitamin D receptor                                             | activator |
| rs636933                    | G | SREBF1 | 0,03057097 | sterol regulatory element binding transcription factor 1       | activator |
| rs636933                    | G | CHD2   | 0,03200899 | chromodomain helicase DNA binding protein 2                    | activator |
| rs636933                    | G | ZBTB7B | 0,03256491 | zinc finger and BTB domain containing 7B                       | repressor |

|          |   |        |            |                                                                |           |
|----------|---|--------|------------|----------------------------------------------------------------|-----------|
| rs636933 | G | RXRG   | 0,03287829 | retinoid X receptor gamma                                      | unknown   |
| rs636933 | G | TBX5   | 0,03376663 | T-box transcription factor 5                                   | activator |
| rs636933 | G | TBX21  | 0,03387379 | T-box transcription factor 21                                  | repressor |
| rs636933 | G | SOX14  | 0,03528567 | SRY-box transcription factor 14                                | repressor |
| rs636933 | G | GLIS2  | 0,0358471  | GLIS family zinc finger 2                                      | dual      |
| rs636933 | G | HINFP  | 0,03695242 | histone H4 transcription factor                                | activator |
| rs636933 | G | PPARA  | 0,03761804 | peroxisome proliferator activated receptor alpha               | dual      |
| rs636933 | G | HINFP  | 0,04393317 | histone H4 transcription factor                                | activator |
| rs636933 | G | TBR1   | 0,04599496 | T-box brain transcription factor 1                             | dual      |
| rs636933 | G | E2F3   | 0,04896531 | E2F transcription factor 3                                     | activator |
| rs636933 | A | PBX    | 0,0071141  | PBX homeobox                                                   | activator |
| rs636933 | A | RHOXF1 | 0,00795352 | Rhox homeobox family member 1                                  | repressor |
| rs636933 | A | CTCFL  | 0,00804316 | CCCTC-binding factor like                                      | activator |
| rs636933 | A | RHOXF1 | 0,00926763 | Rhox homeobox family member 1                                  | repressor |
| rs636933 | A | NFKB   | 0,00953596 | nuclear factor kappa-light-chain-enhancer of activated B cells | activator |
| rs636933 | A | ESR2   | 0,01347985 | estrogen receptor 2                                            | activator |
| rs636933 | A | NR3C1  | 0,01437735 | nuclear receptor subfamily 3 group C member 1                  | activator |
| rs636933 | A | HDAC2  | 0,01734651 | histone deacetylase 2                                          | dual      |
| rs636933 | A | IKZF2  | 0,01965367 | IKAROS family zinc finger 2                                    | dual      |
| rs636933 | A | SETDB1 | 0,02460507 | SET domain bifurcated histone lysine methyltransferase 1       | repressor |
| rs636933 | A | SIX6   | 0,030484   | SIX homeobox 6                                                 | unknown   |
| rs636933 | A | RFX1   | 0,03185975 | regulatory factor X1                                           | activator |
| rs636933 | A | SIX1   | 0,03257415 | SIX homeobox 1                                                 | repressor |
| rs636933 | A | ESR1   | 0,03292515 | estrogen receptor 1                                            | activator |
| rs636933 | A | SPI1   | 0,03640234 | Spi-1 proto-oncogene                                           | activator |
| rs636933 | A | ELK1   | 0,03768681 | ETS transcription factor ELK1                                  | activator |
| rs636933 | A | ESR1   | 0,03890678 | estrogen receptor 1                                            | activator |
| rs636933 | A | IKZF2  | 0,0432231  | IKAROS family zinc finger 2                                    | dual      |
| rs636933 | A | IKZF1  | 0,04506305 | IKAROS family zinc finger 1                                    | repressor |
| rs636933 | A | REST   | 0,04732747 | RE1 silencing transcription factor                             | dual      |

|                          |   |        |            |                                                                |           |
|--------------------------|---|--------|------------|----------------------------------------------------------------|-----------|
| rs636933                 | A | TEAD1  | 0,04818332 | TEA domain transcription factor 1                              | activator |
| T>G rs648595 <i>GCLC</i> |   |        |            |                                                                |           |
| rs648595                 | T | API    | 0,00061688 | adaptor related protein complex 1                              | activator |
| rs648595                 | T | NANOG  | 0,00439521 | Nanog homeobox                                                 | dual      |
| rs648595                 | T | CHD2   | 0,01014112 | chromodomain helicase DNA binding protein 2                    | activator |
| rs648595                 | T | OTX    | 0,01326595 | orthodenticle homeobox                                         | activator |
| rs648595                 | T | TFAP4  | 0,01521282 | transcription factor AP-4                                      | activator |
| rs648595                 | T | SOX9   | 0,01623398 | SRY-box transcription factor 9                                 | activator |
| rs648595                 | T | SOX10  | 0,01828762 | SRY-box transcription factor 10                                | activator |
| rs648595                 | T | Sox6   | 0,01985427 | SRY-box transcription factor 6                                 | dual      |
| rs648595                 | T | SOX4   | 0,0225504  | SRY-box transcription factor 4                                 | activator |
| rs648595                 | T | TCF12  | 0,02415139 | transcription factor 12                                        | activator |
| rs648595                 | T | SOX17  | 0,02745142 | SRY-box transcription factor 17                                | activator |
| rs648595                 | T | PAX2   | 0,02851283 | paired box 2                                                   | activator |
| rs648595                 | T | RHOXF1 | 0,02950364 | Rhox homeobox family member 1                                  | repressor |
| rs648595                 | T | NFKB   | 0,02962136 | nuclear factor kappa-light-chain-enhancer of activated B cells | activator |
| rs648595                 | T | SOX11  | 0,03307767 | SRY-box transcription factor 11                                | activator |
| rs648595                 | T | SRY    | 0,03319703 | sex determining region Y                                       | activator |
| rs648595                 | T | Sox2   | 0,03409888 | SRY-box transcription factor 2                                 | dual      |
| rs648595                 | T | SOX2   | 0,03636354 | SRY-box transcription factor 2                                 | dual      |
| rs648595                 | T | HOXD13 | 0,04241829 | homeobox D13                                                   | unknown   |
| rs648595                 | T | E2F2   | 0,0430016  | E2F transcription factor 2                                     | activator |
| rs648595                 | T | RFX5   | 0,04302185 | regulatory factor X5                                           | activator |
| rs648595                 | T | SRF    | 0,04317877 | serum response factor                                          | activator |
| rs648595                 | T | SOX9   | 0,04340642 | SRY-box transcription factor 9                                 | activator |
| rs648595                 | T | SREBF  | 0,04659847 | SREBF chaperone                                                | activator |
| rs648595                 | T | SOX9   | 0,04858002 | SRY-box transcription factor 9                                 | activator |
| rs648595                 | G | HES1   | 0,00177254 | hes family bHLH transcription factor 1                         | activator |
| rs648595                 | G | TFCP2  | 0,00298368 | transcription factor CP2                                       | activator |
| rs648595                 | G | Klf1   | 0,0039168  | Kruppel like factor 1                                          | activator |

|          |   |             |            |                                                                         |           |
|----------|---|-------------|------------|-------------------------------------------------------------------------|-----------|
| rs648595 | G | ZSCAN4      | 0,00468854 | zinc finger and SCAN domain containing 4                                | unknown   |
| rs648595 | G | KLF4        | 0,00762738 | Kruppel like factor 4                                                   | activator |
| rs648595 | G | Klf4        | 0,00837755 | Kruppel like factor 4                                                   | activator |
| rs648595 | G | SP3         | 0,00877507 | Sp3 transcription factor                                                | dual      |
| rs648595 | G | TP53        | 0,01500937 | tumor protein p53                                                       | activator |
| rs648595 | G | NRF1        | 0,01511558 | nuclear respiratory factor 1_nuclear factor, erythroid 2 like 1         | activator |
| rs648595 | G | KLF5        | 0,01706954 | Kruppel like factor 5                                                   | activator |
| rs648595 | G | MYC::MAX    | 0,01736381 | MYC proto-oncogene, bHLH transcription factor _ MYC associated factor X | dual      |
| rs648595 | G | HIF1A::ARNT | 0,01827785 | aryl hydrocarbon receptor nuclear translocator                          | activator |
| rs648595 | G | NRF1        | 0,01847777 | nuclear respiratory factor 1_nuclear factor, erythroid 2 like 1         | activator |
| rs648595 | G | SP4         | 0,01896841 | Sp4 transcription factor                                                | dual      |
| rs648595 | G | NANOG       | 0,0200426  | Nanog homeobox                                                          | dual      |
| rs648595 | G | EGR1        | 0,02101839 | early growth response 1                                                 | activator |
| rs648595 | G | TFE3        | 0,02163426 | transcription factor binding to IGHM enhancer 3                         | activator |
| rs648595 | G | GLIS2       | 0,02235389 | GLIS family zinc finger 2                                               | dual      |
| rs648595 | G | GATA        | 0,02246203 | glutaminyl-tRNA amidotransferase subunit QRSL1                          | unknown   |
| rs648595 | G | AHR::ARNT   | 0,02323213 | aryl hydrocarbon receptor nuclear translocator                          | activator |
| rs648595 | G | HES7        | 0,02436479 | hes family bHLH transcription factor 7                                  | repressor |
| rs648595 | G | ZNF143      | 0,02500005 | zinc finger protein 143                                                 | activator |
| rs648595 | G | EGR2        | 0,02500072 | early growth response 2                                                 | activator |
| rs648595 | G | TFEB        | 0,02552882 | transcription factor EB                                                 | activator |
| rs648595 | G | USF         | 0,02556531 | Upstream stimulatory factors                                            | activator |
| rs648595 | G | TP53        | 0,02566996 | tumor protein p53                                                       | activator |
| rs648595 | G | BHLHE41     | 0,02762474 | basic helix-loop-helix family member e41                                | repressor |
| rs648595 | G | TFEC        | 0,02823141 | transcription factor EC                                                 | activator |
| rs648595 | G | SP1         | 0,02830371 | Sp1 transcription factor                                                | repressor |
| rs648595 | G | Bhlhe40     | 0,02907825 | basic helix-loop-helix family member e40                                | dual      |
| rs648595 | G | MYC::MAX    | 0,03031536 | MYC proto-oncogene, bHLH transcription factor _ MYC associated factor X | dual      |
| rs648595 | G | MAX         | 0,03050051 | MYC associated factor X                                                 | dual      |
| rs648595 | G | WT1         | 0,03103435 | WT1 transcription factor                                                | unknown   |

|                             |   |              |            |                                                                        |           |
|-----------------------------|---|--------------|------------|------------------------------------------------------------------------|-----------|
| rs648595                    | G | BHLHE40      | 0,03197154 | basic helix-loop-helix family member e40                               | dual      |
| rs648595                    | G | MYC          | 0,03240011 | MYC proto-oncogene, bHLH transcription factor                          | dual      |
| rs648595                    | G | TP53         | 0,03347032 | tumor protein p53                                                      | activator |
| rs648595                    | G | FOXO6        | 0,03520702 | forkhead box O6                                                        | activator |
| rs648595                    | G | FOXJ3        | 0,0352405  | forkhead box J3                                                        | activator |
| rs648595                    | G | NKX2-1       | 0,03691174 | NK2 homeobox 1                                                         | activator |
| rs648595                    | G | PBX1         | 0,03835999 | PBX homeobox 1                                                         | activator |
| rs648595                    | G | KLF7         | 0,03836844 | Kruppel like factor 7                                                  | activator |
| rs648595                    | G | RBPJ         | 0,04418103 | recombination signal binding protein for immunoglobulin kappa J region | activator |
| A>C rs761142 of <i>GCLC</i> |   |              |            |                                                                        |           |
| rs761142                    | A | YY1          | 0,00234753 | YY1 transcription factor                                               | dual      |
| rs761142                    | A | HOXB6        | 0,00275678 | homeobox B6                                                            | unknown   |
| rs761142                    | A | Ddit3::Cebpa | 0,00851731 | _CCAAT enhancer binding protein alpha                                  | activator |
| rs761142                    | A | CEBPA        | 0,00881561 | CCAAT enhancer binding protein alpha                                   | activator |
| rs761142                    | A | STAT         | 0,00918312 | sterol O-acyltransferase 1                                             | unknown   |
| rs761142                    | A | MYB          | 0,0098942  | MYB proto-oncogene, transcription factor                               | activator |
| rs761142                    | A | RFX2         | 0,01074207 | regulatory factor X2                                                   | activator |
| rs761142                    | A | YY1          | 0,01097337 | YY1 transcription factor                                               | dual      |
| rs761142                    | A | AHR          | 0,01163674 | aryl hydrocarbon receptor                                              | dual      |
| rs761142                    | A | NR3C1        | 0,01245523 | nuclear receptor subfamily 3 group C member 1                          | activator |
| rs761142                    | A | E2F1         | 0,01432682 | E2F transcription factor 1                                             | repressor |
| rs761142                    | A | EN1          | 0,01620891 | engrailed homeobox 1                                                   | activator |
| rs761142                    | A | ATF4         | 0,01658051 | activating transcription factor 4                                      | activator |
| rs761142                    | A | CUX1         | 0,01952144 | cut like homeobox 1                                                    | activator |
| rs761142                    | A | CHD2         | 0,02006561 | chromodomain helicase DNA binding protein 2                            | activator |
| rs761142                    | A | NFY          | 0,02107803 | nuclear transcription factor Y subunit                                 | dual      |
| rs761142                    | A | HLF          | 0,02173271 | HLF transcription factor, PAR bZIP family member                       | activator |
| rs761142                    | A | BCL6B        | 0,0221881  | BCL6B transcription repressor                                          | dual      |
| rs761142                    | A | GBX2         | 0,02491298 | gastrulation brain homeobox 2                                          | unknown   |
| rs761142                    | A | YY2          | 0,02548136 | YY2 transcription factor                                               | dual      |

|          |   |        |            |                                                                 |           |
|----------|---|--------|------------|-----------------------------------------------------------------|-----------|
| rs761142 | A | CEBPB  | 0,02658066 | CCAAT enhancer binding protein beta                             | dual      |
| rs761142 | A | MEOX1  | 0,02813979 | mesenchyme homeobox 1                                           | dual      |
| rs761142 | A | TEAD1  | 0,02814403 | TEA domain transcription factor 1                               | activator |
| rs761142 | A | BARX1  | 0,02843163 | BARX homeobox 1                                                 | unknown   |
| rs761142 | A | BCL6B  | 0,03189653 | BCL6B transcription repressor                                   | dual      |
| rs761142 | A | ZBTB33 | 0,03205876 | zinc finger and BTB domain containing 33                        | activator |
| rs761142 | A | E2F4   | 0,03247437 | E2F transcription factor 4                                      | activator |
| rs761142 | A | MXI1   | 0,03331496 | MAX interactor 1, dimerization protein                          | repressor |
| rs761142 | A | EP300  | 0,03332363 | E1A binding protein p300                                        | activator |
| rs761142 | A | RFX5   | 0,03354332 | regulatory factor X5                                            | activator |
| rs761142 | A | HOXD3  | 0,03506551 | homeobox D3                                                     | unknown   |
| rs761142 | A | CEBP   | 0,03516007 | CCAAT enhancer binding protein alpha                            | activator |
| rs761142 | A | NKX6-1 | 0,04395918 | NK6 homeobox 1                                                  | dual      |
| rs761142 | A | NOBOX  | 0,04438225 | NOBOX oogenesis homeobox                                        | activator |
| rs761142 | A | SP1    | 0,04583886 | Sp1 transcription factor                                        | repressor |
| rs761142 | A | HOXA6  | 0,04814392 | homeobox A6                                                     | unknown   |
| rs761142 | A | YY1    | 0,04914022 | YY1 transcription factor                                        | dual      |
| rs761142 | A | MEOX1  | 0,0491462  | mesenchyme homeobox 1                                           | dual      |
| rs761142 | A | LHX8   | 0,04960732 | LIM homeobox 8                                                  | unknown   |
| rs761142 | A | MEOX2  | 0,0498538  | mesenchyme homeobox 2                                           | activator |
| rs761142 | C | HNF4A  | 0,00002893 | hepatocyte nuclear factor 4 alpha                               | activator |
| rs761142 | C | NRF1   | 0,00378918 | nuclear respiratory factor 1_nuclear factor, erythroid 2 like 1 | activator |
| rs761142 | C | SOX14  | 0,00608772 | SRY-box transcription factor 14                                 | repressor |
| rs761142 | C | REST   | 0,00635676 | RE1 silencing transcription factor                              | dual      |
| rs761142 | C | AR     | 0,00780215 | androgen receptor                                               | dual      |
| rs761142 | C | TP53   | 0,01129834 | tumor protein p53                                               | activator |
| rs761142 | C | HNF4   | 0,01226678 | hepatocyte nuclear factor 4 alpha                               | activator |
| rs761142 | C | NRF1   | 0,01515224 | nuclear respiratory factor 1_nuclear factor, erythroid 2 like 1 | activator |
| rs761142 | C | PRDM1  | 0,02163379 | PR/SET domain 1                                                 | repressor |
| rs761142 | C | NFY    | 0,02216072 | nuclear transcription factor Y subunit                          | dual      |



|                              |   |         |            |                                                                                                 |           |
|------------------------------|---|---------|------------|-------------------------------------------------------------------------------------------------|-----------|
| rs761142                     | C | EBF1    | 0,02326326 | EBF transcription factor 1                                                                      | activator |
| rs761142                     | C | VDR     | 0,02414417 | vitamin D receptor                                                                              | activator |
| rs761142                     | C | PBX3    | 0,0246509  | PBX homeobox 3                                                                                  | activator |
| rs761142                     | C | MYC     | 0,02533566 | MYC proto-oncogene, bHLH transcription factor                                                   | dual      |
| rs761142                     | C | EGR1    | 0,03049554 | early growth response 1                                                                         | activator |
| rs761142                     | C | HES7    | 0,03073847 | hes family bHLH transcription factor 7                                                          | repressor |
| rs761142                     | C | NR1H    | 0,03645429 | nuclear receptor subfamily 1 group H                                                            | activator |
| rs761142                     | C | TP53    | 0,04041564 | tumor protein p53                                                                               | activator |
| rs761142                     | C | TFCP2   | 0,04080412 | transcription factor CP2                                                                        | activator |
| rs761142                     | C | MYB     | 0,045021   | MYB proto-oncogene, transcription factor                                                        | activator |
| rs761142                     | C | ATF3    | 0,04750237 | activating transcription factor 3                                                               | dual      |
| rs761142                     | C | RFX5    | 0,04869586 | regulatory factor X5                                                                            | activator |
| rs761142                     | C | PTEN    | 0,04935093 | phosphatase and tensin homolog                                                                  | unknown   |
| rs761142                     | C | E2F1    | 0,0494137  | E2F transcription factor 1                                                                      | repressor |
| C>T rs2301022 of <i>GCLM</i> |   |         |            |                                                                                                 |           |
| rs2301022                    | T | PDX1    | 0,004476   | Pancreatic and duodenal homeobox 1                                                              | activator |
| rs2301022                    | T | ZSCAN26 | 0,0089533  | Zinc finger and SCAN domain containing 26                                                       | activator |
| rs2301022                    | T | ELF3    | 0,0090783  | E74 like ETS transcription factor 3                                                             | activator |
| rs2301022                    | T | ZNF652  | 0,00947956 | zinc finger protein 652                                                                         | repressor |
| rs2301022                    | T | PAX4    | 0,01151472 | paired box 4                                                                                    | repressor |
| rs2301022                    | T | SMARCC1 | 0,01393287 | SWI/SNF related, matrix associated, actin dependent regulator of chromatin subfamily c member 1 | activator |
| rs2301022                    | T | JDP2    | 0,01933904 | Jun dimerization protein 2                                                                      | repressor |
| rs2301022                    | T | FOXP3   | 0,01974083 | forkhead box P3                                                                                 | dual      |
| rs2301022                    | T | ZBTB33  | 0,02059947 | zinc finger and BTB domain containing 33                                                        | activator |
| rs2301022                    | T | PRRX2   | 0,02139004 | paired related homeobox 2                                                                       | unknown   |
| rs2301022                    | T | MEF2A   | 0,02506893 | myocyte enhancer factor 2A                                                                      | activator |
| rs2301022                    | T | OTX2    | 0,02549287 | orthodenticle homeobox 2                                                                        | activator |
| rs2301022                    | T | DMBX1   | 0,02724183 | diencephalon/mesencephalon homeobox 1                                                           | activator |
| rs2301022                    | T | RHOXF2  | 0,0277196  | Rhox homeobox family member 2                                                                   | unknown   |
| rs2301022                    | T | JUND    | 0,02883945 | JunB proto-oncogene, AP-1 transcription factor subunit                                          | activator |

|           |   |              |            |                                                        |           |
|-----------|---|--------------|------------|--------------------------------------------------------|-----------|
| rs2301022 | T | PITX1        | 0,03254459 | paired like homeodomain 1                              | activator |
| rs2301022 | T | JUNB         | 0,03254707 | JunB proto-oncogene, AP-1 transcription factor subunit | activator |
| rs2301022 | T | CUX1         | 0,03256081 | cut like homeobox 1                                    | activator |
| rs2301022 | T | HNF4A        | 0,03335128 | hepatocyte nuclear factor 4 alpha                      | activator |
| rs2301022 | T | UNCX         | 0,03362804 | UNC homeobox                                           | unknown   |
| rs2301022 | T | PAX5         | 0,03459243 | paired box 5                                           | activator |
| rs2301022 | T | FOSL2        | 0,03746132 | FOS like 2, AP-1 transcription factor subunit          | unknown   |
| rs2301022 | T | HOXB5        | 0,0396166  | homeobox B5                                            | unknown   |
| rs2301022 | T | BARX1        | 0,03988725 | BARX homeobox 1                                        | unknown   |
| rs2301022 | T | TFAP2A       | 0,04041147 | transcription factor AP-2 alpha                        | dual      |
| rs2301022 | T | SRF          | 0,04192369 | serum response factor                                  | activator |
| rs2301022 | T | VSX2         | 0,04753928 | visual system homeobox 2                               | dual      |
| rs2301022 | T | FOS          | 0,04858529 | Fos proto-oncogene, AP-1 transcription factor subunit  | unknown   |
| rs2301022 | T | POU6F2       | 0,04872158 | POU class 6 homeobox 2                                 | activator |
| rs2301022 | C | SPIC         | 0,00106353 | Spi-C transcription factor                             | activator |
| rs2301022 | C | TP53         | 0,00378427 | tumor protein p53                                      | activator |
| rs2301022 | C | STAT2::STAT1 | 0,00687506 | signal transducer and activator of transcription 2::1  | activator |
| rs2301022 | C | RUNX2        | 0,00954222 | RUNX family transcription factor 2                     | activator |
| rs2301022 | C | SPI1         | 0,01051148 | Spi-1 proto-oncogene                                   | activator |
| rs2301022 | C | IRF3         | 0,01250049 | interferon regulatory factor 3                         | activator |
| rs2301022 | C | SPI1         | 0,01390572 | Spi-1 proto-oncogene                                   | activator |
| rs2301022 | C | PAX3         | 0,01695678 | paired box 3                                           | activator |
| rs2301022 | C | GABPA        | 0,0175597  | GA binding protein transcription factor subunit alpha  | activator |
| rs2301022 | C | IRF1         | 0,01998595 | interferon regulatory factor 1                         | activator |
| rs2301022 | C | HDAC2        | 0,02096926 | histone deacetylase 2                                  | dual      |
| rs2301022 | C | IRF5         | 0,02496072 | interferon regulatory factor 5                         | activator |
| rs2301022 | C | MYB          | 0,02652524 | MYB proto-oncogene, transcription factor               | activator |
| rs2301022 | C | IRF1         | 0,0277301  | interferon regulatory factor 1                         | activator |
| rs2301022 | C | HDAC2        | 0,02775999 | histone deacetylase 2                                  | dual      |
| rs2301022 | C | IRF8         | 0,03824357 | interferon regulatory factor 8                         | dual      |

|                              |   |                  |            |                                                                   |           |
|------------------------------|---|------------------|------------|-------------------------------------------------------------------|-----------|
| rs2301022                    | C | HNF4A            | 0,03829104 | hepatocyte nuclear factor 4 alpha                                 | activator |
| rs2301022                    | C | TFCP2            | 0,03985543 | transcription factor CP2                                          | activator |
| rs2301022                    | C | SETDB1           | 0,04329857 | SET domain bifurcated histone lysine methyltransferase 1          | repressor |
| rs2301022                    | C | IRF5             | 0,04754444 | interferon regulatory factor 5                                    | activator |
| T>C rs3827715 of <i>GCLM</i> |   |                  |            |                                                                   |           |
| rs3827715                    | T | AP1              | 0,00335889 | adaptor related protein complex 1                                 | activator |
| rs3827715                    | T | NEUROD2          | 0,00927587 | neuronal differentiation 2                                        | activator |
| rs3827715                    | T | TAL1             | 0,00961019 | TAL bHLH transcription factor 1, erythroid differentiation factor | activator |
| rs3827715                    | T | ZBTB18           | 0,01034002 | zinc finger and BTB domain containing 18                          | activator |
| rs3827715                    | T | RUNX1            | 0,01313097 | RUNX family transcription factor 1                                | activator |
| rs3827715                    | T | FOXJ3            | 0,01791793 | forkhead box J3                                                   | activator |
| rs3827715                    | T | FOXM1            | 0,02014479 | forkhead box M1                                                   | repressor |
| rs3827715                    | T | SRY              | 0,02922733 | sex determining region Y                                          | activator |
| rs3827715                    | T | FOXH1            | 0,03090103 | forkhead box H1                                                   | activator |
| rs3827715                    | T | ZBTB18           | 0,03263217 | zinc finger and BTB domain containing 18                          | activator |
| rs3827715                    | T | SOX8             | 0,03353594 | SRY-box transcription factor 8                                    | unknown   |
| rs3827715                    | T | FOXO3            | 0,03447913 | forkhead box O3                                                   | activator |
| rs3827715                    | T | NR3C1            | 0,03476121 | nuclear receptor subfamily 3 group C member 1                     | activator |
| rs3827715                    | T | RUNX1            | 0,03556729 | RUNX family transcription factor 1                                | activator |
| rs3827715                    | T | RXRG             | 0,03721051 | retinoid X receptor gamma                                         | unknown   |
| rs3827715                    | T | TCF21            | 0,04100362 | transcription factor 21                                           | dual      |
| rs3827715                    | T | IRF7             | 0,0422366  | interferon regulatory factor 7                                    | activator |
| rs3827715                    | T | FOXO1            | 0,04366622 | forkhead box O1                                                   | activator |
| rs3827715                    | T | ATOH1            | 0,0489216  | atonal bHLH transcription factor 1                                | dual      |
| rs3827715                    | C | XBP1             | 0,00081675 | X-box binding protein 1 pseudogene 1                              | activator |
| rs3827715                    | C | MLX              | 0,00093065 | MAX dimerization protein MLX                                      | repressor |
| rs3827715                    | C | HIF1A::ARNT      | 0,00124462 | aryl hydrocarbon receptor nuclear translocator                    | activator |
| rs3827715                    | C | HIF1A            | 0,00137194 | hypoxia inducible factor 1 subunit alpha                          | activator |
| rs3827715                    | C | AHR::ARNT::HIF1A | 0,00148157 | aryl hydrocarbon receptor nuclear translocator                    | activator |
| rs3827715                    | C | GRHL1            | 0,00149854 | grainyhead like transcription factor 1                            | activator |

|           |   |              |            |                                                                               |           |
|-----------|---|--------------|------------|-------------------------------------------------------------------------------|-----------|
| rs3827715 | C | HEY1         | 0,00150794 | hes related family bHLH transcription factor with YRPW motif 1                |           |
| rs3827715 | C | XBP1         | 0,00201296 | X-box binding protein 1 pseudogene 1                                          | activator |
| rs3827715 | C | MYC          | 0,00234251 | MYC proto-oncogene, bHLH transcription factor                                 | dual      |
| rs3827715 | C | XBP1         | 0,00276718 | X-box binding protein 1 pseudogene 1                                          | activator |
| rs3827715 | C | GRHL1        | 0,00370821 | grainyhead like transcription factor 1                                        | activator |
| rs3827715 | C | MYC::MAX     | 0,00401597 | MYC proto-oncogene, bHLH transcription factor _ MYC associated factor X       | dual      |
| rs3827715 | C | MYC          | 0,00464712 | MYC proto-oncogene, bHLH transcription factor                                 | dual      |
| rs3827715 | C | CREB3L1      | 0,00548545 | cAMP responsive element binding protein 3 like 1                              | activator |
| rs3827715 | C | BHLHE40      | 0,00550655 | basic helix-loop-helix family member e40                                      | dual      |
| rs3827715 | C | CREB3L2      | 0,00561675 | cAMP responsive element binding protein 3 like 2                              | activator |
| rs3827715 | C | BHLHE40      | 0,00784495 | basic helix-loop-helix family member e40                                      | dual      |
| rs3827715 | C | MYC::MAX     | 0,00801343 | MYC proto-oncogene, bHLH transcription factor _ MYC associated factor X       | dual      |
| rs3827715 | C | SREBF2       | 0,00826871 | sterol regulatory element binding transcription factor 2                      | activator |
| rs3827715 | C | TP53         | 0,0092016  | tumor protein p53                                                             | activator |
| rs3827715 | C | HES7         | 0,00931655 | hes family bHLH transcription factor 7                                        | repressor |
| rs3827715 | C | CLOCK::ARNTL | 0,01058606 | clock circadian regulator:aryl hydrocarbon receptor nuclear translocator like | dual      |
| rs3827715 | C | GMEB2        | 0,01105621 | glucocorticoid modulatory element binding protein 2                           | activator |
| rs3827715 | C | PROX1        | 0,01110257 | prospero homeobox 1                                                           | repressor |
| rs3827715 | C | CREB3L1      | 0,0116786  | cAMP responsive element binding protein 3 like 1                              | activator |
| rs3827715 | C | TFCP2        | 0,01276672 | transcription factor CP2                                                      | activator |
| rs3827715 | C | ARNT         | 0,01283822 | aryl hydrocarbon receptor nuclear translocator                                | activator |
| rs3827715 | C | USF2         | 0,01468488 | upstream transcription factor 2, c-fos interacting                            | activator |
| rs3827715 | C | MYC::MAX     | 0,01471497 | MYC proto-oncogene, bHLH transcription factor _ MYC associated factor X       | dual      |
| rs3827715 | C | HIF1A        | 0,0155005  | hypoxia inducible factor 1 subunit alpha                                      | activator |
| rs3827715 | C | FOXN1        | 0,01588139 | forkhead box N1                                                               | activator |
| rs3827715 | C | MYC          | 0,01634499 | MYC proto-oncogene, bHLH transcription factor                                 | dual      |
| rs3827715 | C | ZEB1         | 0,01696481 | zinc finger E-box binding homeobox 1                                          | dual      |
| rs3827715 | C | CREB3        | 0,01931951 | cAMP responsive element binding protein 3 like 4                              | activator |
| rs3827715 | C | BRCA1        | 0,02090425 | BRCA1 DNA repair associated                                                   | activator |
| rs3827715 | C | ZBTB14       | 0,02388803 | zinc finger and BTB domain containing 14                                      | activator |

|                              |   |              |            |                                                        |           |
|------------------------------|---|--------------|------------|--------------------------------------------------------|-----------|
| rs3827715                    | C | BHLHE41      | 0,02417896 | basic helix-loop-helix family member e41               | repressor |
| rs3827715                    | C | BRCA1        | 0,02501203 | BRCA1 DNA repair associated                            | activator |
| rs3827715                    | C | XBP1         | 0,02642666 | X-box binding protein 1 pseudogene 1                   | activator |
| rs3827715                    | C | NANOG        | 0,0310723  | Nanog homeobox                                         | dual      |
| rs3827715                    | C | TCF3         | 0,03189894 | transcription factor 3 / transcription factor 7 like 1 | dual      |
| rs3827715                    | C | TP53         | 0,03215823 | tumor protein p53                                      | activator |
| rs3827715                    | C | MYB          | 0,03539749 | MYB proto-oncogene, transcription factor               | activator |
| rs3827715                    | C | VDR          | 0,03559699 | vitamin D receptor                                     | activator |
| rs3827715                    | C | BHLHE40      | 0,04000795 | basic helix-loop-helix family member e40               | dual      |
| rs3827715                    | C | GMEB2        | 0,04261066 | glucocorticoid modulatory element binding protein 2    | activator |
| C>A rs7517826 of <i>GCLM</i> |   |              |            |                                                        |           |
| rs7517826                    | C | NFE2L1       | 0,00000024 | nuclear factor, erythroid 2 like 1                     | activator |
| rs7517826                    | C | SOX17        | 0,00023461 | SRY-box transcription factor 17                        | activator |
| rs7517826                    | C | IRF          | 0,00068809 | tripartite motif containing 63                         | unknown   |
| rs7517826                    | C | TGIF1        | 0,00210978 | TGFB induced factor homeobox 1                         | repressor |
| rs7517826                    | C | CREB1        | 0,00319809 | cAMP responsive element binding protein 1              | dual      |
| rs7517826                    | C | MEIS1        | 0,00391969 | Meis homeobox 1                                        | activator |
| rs7517826                    | C | IRF          | 0,00435958 | tripartite motif containing 63                         | unknown   |
| rs7517826                    | C | STAT4        | 0,00438168 | signal transducer and activator of transcription 4     | activator |
| rs7517826                    | C | NFE2L1::MAFG | 0,00486267 | nuclear factor, erythroid 2 like 1                     | activator |
| rs7517826                    | C | TEAD1        | 0,00487045 | TEA domain transcription factor 1                      | activator |
| rs7517826                    | C | ESRRA        | 0,00508248 | estrogen related receptor alpha                        | activator |
| rs7517826                    | C | MEIS2        | 0,00566992 | Meis homeobox 2                                        | activator |
| rs7517826                    | C | MEIS3        | 0,00613075 | Meis homeobox 3 pseudogene 1                           | activator |
| rs7517826                    | C | Sox17        | 0,00616632 | SRY-box transcription factor 17                        | activator |
| rs7517826                    | C | NFE2L1::MafG | 0,00764634 | nuclear factor, erythroid 2 like 1                     | activator |
| rs7517826                    | C | PAX2         | 0,00796219 | paired box 2                                           | activator |
| rs7517826                    | C | Pax2         | 0,00814851 | paired box 2                                           | activator |
| rs7517826                    | C | IRF1         | 0,00889233 | interferon regulatory factor 1                         | activator |
| rs7517826                    | C | CREB1        | 0,00898061 | cAMP responsive element binding protein 1              | dual      |

|           |   |          |            |                                                  |           |
|-----------|---|----------|------------|--------------------------------------------------|-----------|
| rs7517826 | C | HESX1    | 0,01077647 | HESX homeobox 1                                  | unknown   |
| rs7517826 | C | MEIS3    | 0,0112138  | Meis homeobox 3 pseudogene 1                     | activator |
| rs7517826 | C | AP1      | 0,01288358 | adaptor related protein complex 1                | activator |
| rs7517826 | C | EP300    | 0,01335874 | E1A binding protein p300                         | activator |
| rs7517826 | C | VSX1     | 0,0147064  | visual system homeobox 1                         | unknown   |
| rs7517826 | C | RUNX1    | 0,01511712 | RUNX family transcription factor 1               | activator |
| rs7517826 | C | MEIS3    | 0,015509   | Meis homeobox 3 pseudogene 1                     | activator |
| rs7517826 | C | POU2F1   | 0,015944   | POU class 2 homeobox 1                           | activator |
| rs7517826 | C | NR4A2    | 0,01656418 | nuclear receptor subfamily 4 group A member 2    | activator |
| rs7517826 | C | TGIF2    | 0,01804187 | TGFB induced factor homeobox 2                   | repressor |
| rs7517826 | C | ARHGEF12 | 0,0184403  | Rho guanine nucleotide exchange factor 12        | activator |
| rs7517826 | C | Mecom    | 0,01870954 | MDS1 and EVI1 complex locus                      | unknown   |
| rs7517826 | C | CREB1    | 0,01906193 | cAMP responsive element binding protein 1        | dual      |
| rs7517826 | C | PKNOX1   | 0,02099474 | PBX/knotted 1 homeobox 1                         | unknown   |
| rs7517826 | C | LHX9     | 0,02257196 | LIM homeobox 9                                   | unknown   |
| rs7517826 | C | MEIS2    | 0,02277129 | Meis homeobox 2                                  | activator |
| rs7517826 | C | MEIS1    | 0,02299105 | Meis homeobox 1                                  | activator |
| rs7517826 | C | MEIS1    | 0,02539711 | Meis homeobox 1                                  | activator |
| rs7517826 | C | RUNX1    | 0,02706844 | RUNX family transcription factor 1               | activator |
| rs7517826 | C | PKNOX2   | 0,02816623 | PBX/knotted 1 homeobox 2                         | dual      |
| rs7517826 | C | MEIS1    | 0,02908212 | Meis homeobox 1                                  | activator |
| rs7517826 | C | TGIF1    | 0,0300918  | TGFB induced factor homeobox 1                   | repressor |
| rs7517826 | C | PAX5     | 0,03057097 | paired box 5                                     | activator |
| rs7517826 | C | AP1      | 0,03205362 | adaptor related protein complex 1                | activator |
| rs7517826 | C | Meis1    | 0,03400455 | Meis homeobox 1                                  | activator |
| rs7517826 | C | SRY      | 0,03409278 | sex determining region Y                         | activator |
| rs7517826 | C | YY1      | 0,03444788 | YY1 transcription factor                         | dual      |
| rs7517826 | C | SIX4     | 0,03490717 | SIX homeobox 4                                   | dual      |
| rs7517826 | C | CREB3    | 0,03516947 | cAMP responsive element binding protein 3 like 4 | activator |
| rs7517826 | C | HNF4     | 0,03588184 | hepatocyte nuclear factor 4 alpha                | activator |

|           |   |        |            |                                    |           |
|-----------|---|--------|------------|------------------------------------|-----------|
| rs7517826 | C | SPI1   | 0,03781513 | Spi-1 proto-oncogene               | activator |
| rs7517826 | C | STAT   | 0,03810443 | sterol O-acyltransferase 1         | unknown   |
| rs7517826 | C | TP53   | 0,04000995 | tumor protein p53                  | activator |
| rs7517826 | C | ESRRA  | 0,04481598 | estrogen related receptor alpha    | activator |
| rs7517826 | C | Sox3   | 0,04669724 | SRY-box transcription factor 3     | activator |
| rs7517826 | C | ZNF713 | 0,04730671 | zinc finger protein 713            | unknown   |
| rs7517826 | A | CCDC6  | 0,00000001 | coiled-coil domain containing 6    | unknown   |
| rs7517826 | A | POU2F1 | 0,00228069 | POU class 2 homeobox 1             | activator |
| rs7517826 | A | HMGA1  | 0,0033464  | high mobility group AT-hook 1      | unknown   |
| rs7517826 | A | SOX14  | 0,00406735 | SRY-box transcription factor 14    | repressor |
| rs7517826 | A | SOX21  | 0,00657245 | SRY-box transcription factor 21    | repressor |
| rs7517826 | A | SRY    | 0,01077225 | sex determining region Y           | activator |
| rs7517826 | A | EN1    | 0,01158819 | engrailed homeobox 1               | repressor |
| rs7517826 | A | TLX2   | 0,01277172 | T cell leukemia homeobox 2         | activator |
| rs7517826 | A | HMGA1  | 0,01862471 | high mobility group AT-hook 1      | unknown   |
| rs7517826 | A | DLX1   | 0,01995175 | distal-less homeobox 1             | dual      |
| rs7517826 | A | PDX1   | 0,02008051 | Pancreatic and duodenal homeobox 1 | activator |
| rs7517826 | A | DLX4   | 0,020445   | distal-less homeobox 4             | unknown   |
| rs7517826 | A | CENPB  | 0,02056078 | centromere protein B               | repressor |
| rs7517826 | A | FOXJ1  | 0,02101787 | forkhead box J1                    | activator |
| rs7517826 | A | PRRX2  | 0,02139004 | paired related homeobox 2          | unknown   |
| rs7517826 | A | HINFP  | 0,02140895 | histone H4 transcription factor    | activator |
| rs7517826 | A | DLX3   | 0,02151809 | distal-less homeobox 3             | unknown   |
| rs7517826 | A | DLX2   | 0,02151908 | distal-less homeobox 2             | unknown   |
| rs7517826 | A | DLX2   | 0,02222268 | distal-less homeobox 2             | unknown   |
| rs7517826 | A | POU3F3 | 0,02392953 | POU class 3 homeobox 3             | activator |
| rs7517826 | A | DLX5   | 0,02412036 | distal-less homeobox 5             | activator |
| rs7517826 | A | RELA   | 0,02493694 | RELA proto-oncogene, NF-kB subunit | dual      |
| rs7517826 | A | DLX6   | 0,0255299  | distal-less homeobox 6             | unknown   |
| rs7517826 | A | MSX2   | 0,02565044 | msh homeobox 2                     | repressor |

|           |   |              |            |                                                                |           |
|-----------|---|--------------|------------|----------------------------------------------------------------|-----------|
| rs7517826 | A | Prrx2        | 0,02727507 | paired related homeobox 2                                      | unknown   |
| rs7517826 | A | RELA         | 0,02898625 | RELA proto-oncogene, NF-kB subunit                             | dual      |
| rs7517826 | A | Pdx1         | 0,02975664 | Pancreatic and duodenal homeobox 1                             | activator |
| rs7517826 | A | DDIT3::CEBPA | 0,02985602 | _CCAAT enhancer binding protein alpha                          | activator |
| rs7517826 | A | MSX1         | 0,03064996 | msh homeobox 1                                                 | repressor |
| rs7517826 | A | POU3F1       | 0,03152657 | POU class 3 homeobox 1                                         | unknown   |
| rs7517826 | A | NFKB         | 0,03230733 | nuclear factor kappa-light-chain-enhancer of activated B cells | activator |
| rs7517826 | A | PROP1        | 0,03234605 | PROP paired-like homeobox 1                                    | activator |
| rs7517826 | A | SOX3         | 0,03529995 | SRY-box transcription factor 3                                 | activator |
| rs7517826 | A | ARID3A       | 0,03595632 | AT-rich interaction domain 3A                                  | activator |
| rs7517826 | A | BBX          | 0,03922261 | BBX high mobility group box domain containing                  | unknown   |
| rs7517826 | A | ALX4         | 0,03980972 | ALX homeobox 4                                                 | activator |
| rs7517826 | A | IRF7         | 0,04032572 | interferon regulatory factor 7                                 | activator |
| rs7517826 | A | BSX          | 0,04186821 | brain specific homeobox                                        | activator |
| rs7517826 | A | EP300        | 0,04276296 | E1A binding protein p300                                       | activator |
| rs7517826 | A | PHOX2B       | 0,04298898 | paired like homeobox 2B                                        | activator |
| rs7517826 | A | PDX1         | 0,04366881 | Pancreatic and duodenal homeobox 1                             | activator |
| rs7517826 | A | PHOX2B       | 0,04445184 | paired like homeobox 2B                                        | activator |
| rs7517826 | A | STAT         | 0,04843201 | sterol O-acyltransferase 1                                     | unknown   |
| rs7517826 | A | FOXD3        | 0,04900784 | forkhead box D3                                                | repressor |
