# Supplementary material for: The Impact of Genetic Polymorphisms in Glutamate-Cysteine Ligase, a Key Enzyme of Glutathione Biosynthesis, on Ischemic Stroke Risk and Brain Infarct Size
Source: MDPI journal article supplement (doi:10.3390/life12040602), 2022-04-18
Supplement: s1 [file s1]

**Statistics for the best *mbmdr*-models of G×G and G×E interactions associated with the risk of ischemic stroke\***

| Risk factors/SNPs     | Number of <i>n</i> -order models, n (%) |      |          |      |          |      |           |      |
|-----------------------|-----------------------------------------|------|----------|------|----------|------|-----------|------|
|                       | 2n (19)                                 | %    | 3n (123) | %    | 4n (499) | %    | 5n (2135) | %    |
| Smoking               | 7                                       | 18,4 | 62       | 16,8 | 233      | 11,7 | 752       | 7,0  |
| Alcohol               | 1                                       | 2,6  | 17       | 4,6  | 56       | 2,8  | 275       | 2,6  |
| Fruit/Vegetable       | 1                                       | 2,6  | 16       | 4,3  | 58       | 2,9  | 296       | 2,8  |
| rs12524494            | 0                                       | 0,0  | 7        | 1,9  | 47       | 2,4  | 462       | 4,3  |
| rs17883901            | 0                                       | 0,0  | 9        | 2,4  | 74       | 3,7  | 429       | 4,0  |
| rs606548              | 1                                       | 2,6  | 12       | 3,3  | 87       | 4,4  | 475       | 4,4  |
| rs636933              | 1                                       | 2,6  | 7        | 1,9  | 52       | 2,6  | 323       | 3,0  |
| rs648595              | 1                                       | 2,6  | 14       | 3,8  | 98       | 4,9  | 461       | 4,3  |
| rs761142              | 1                                       | 2,6  | 9        | 2,4  | 77       | 3,9  | 322       | 3,0  |
| rs2301022             | 8                                       | 21,1 | 47       | 12,7 | 222      | 11,1 | 844       | 7,9  |
| rs3827715             | 1                                       | 2,6  | 10       | 2,7  | 83       | 4,2  | 384       | 3,6  |
| rs7517826             | 0                                       | 0,0  | 11       | 3,0  | 95       | 4,8  | 349       | 3,3  |
| rs11556924            | 3                                       | 7,9  | 21       | 5,7  | 102      | 5,1  | 464       | 4,3  |
| rs12449964            | 1                                       | 2,6  | 13       | 3,5  | 80       | 4,0  | 397       | 3,7  |
| rs12646447            | 1                                       | 2,6  | 12       | 3,3  | 82       | 4,1  | 513       | 4,8  |
| rs2417957             | 1                                       | 2,6  | 5        | 1,4  | 37       | 1,9  | 397       | 3,7  |
| rs4322086             | 7                                       | 18,4 | 57       | 15,4 | 282      | 14,1 | 1034      | 9,7  |
| rs6511720             | 2                                       | 5,3  | 19       | 5,1  | 89       | 4,5  | 1042      | 9,8  |
| rs783396              | 1                                       | 2,6  | 16       | 4,3  | 74       | 3,7  | 794       | 7,4  |
| rs899997              | 0                                       | 0,0  | 5        | 1,4  | 68       | 3,4  | 662       | 6,2  |
| Summary statistics:   |                                         |      |          |      |          |      |           |      |
| Risk factors          | 9                                       | 23,7 | 95       | 25,7 | 347      | 17,4 | 1323      | 12,4 |
| <i>GCLM/GCLC</i> SNPs | 13                                      | 34,2 | 126      | 34,1 | 835      | 41,8 | 4049      | 37,9 |
| GWAS SNPs             | 16                                      | 42,1 | 148      | 40,1 | 814      | 40,8 | 5303      | 49,7 |

\*G×G (SNP×SNP) and G×E (SNP×risk factor) interactions were analyzed by the model-based multifactor dimensionality reduction (*mbmdr*) method (Calle et al, 2010).

The best *mbmdr*-models include the 25% of models with the lowest permutation *P*-values.
